# Supplementary material for: The weather diary of Georg Christoph Eimmart for Nuremberg, 1695–1704
Source: Copernicus journal article supplement (doi:10.5194/cp-2022-98), 2023-01-26
Supplement: Supplementary file 1 [file Eimmart_Diary.xlsx]

## Sheet: Data
Year_Jul	Month_Jul	Day_Jul	Year_Greg	Month_Greg	Day_Greg	Symbol_Col1	Text_Col1($ = illegible)	Symbol_Col2	Text_Col2($ = illegible)	Wind_Col3	Text_Col3($ = illegible)	Precipitation(1=Rain,2=Snow,3=Rain&Snow)	WeatherSymb_Col1(1=sunny,2=partly_sunny,3=cloudy)	WeatherSymb_Col2(1=sunny,2=partly_sunny,3=cloudy)	WeatherSymbText_Col1(1=sunny,2=partly_sunny,3=cloudy)	WeatherSymbText_Col2(1=sunny,2=partly_sunny,3=cloudy)
1695	1	1	1695	1	11	sue		1		O			1		1
1695	1	2	1695	1	12	sue		3		O			1		1
1695	1	3	1695	1	13	suh cl		par		O-S			2		2
1695	1	4	1695	1	14	suh cl		par		O-S			2		2
1695	1	5	1695	1	15	dots		par		SO		1			2
1695	1	6	1695	1	16	dots		par		SO		1			2
1695	1	7	1695	1	17	dots		par		S		1			2
1695	1	8	1695	1	18	diag		par		S		1			3
1695	1	9	1695	1	19	wave		par		SW		1			3
1695	1	10	1695	1	20	p dots		par		S-W		3			3
1695	1	11	1695	1	21	p		1		NW		2
1695	1	12	1695	1	22	suh cl		1		O			2		2
1695	1	13	1695	1	23	sue		2		O			1		1
1695	1	14	1695	1	24	sue		2		O			1		1
1695	1	15	1695	1	25	sue		2		O			1		1
1695	1	16	1695	1	26	suh p		par		W		2	2		2
1695	1	17	1695	1	27	suh cl		par		S			2		2
1695	1	18	1695	1	28	suh hor		par		O N			2		2
1695	1	19	1695	1	29	hor		par		NW			3		3
1695	1	20	1695	1	30	p		par		NW		2
1695	1	21	1695	1	31	p		par		SW		2
1695	1	22	1695	2	1	suh cl		1		S			2		2
1695	1	23	1695	2	2	dots sue		3		S		1	2		2
1695	1	24	1695	2	3	p		2		mixed		2
1695	1	25	1695	2	4	hor		1		mixed			3		3
1695	1	26	1695	2	5	hor		par		O			3		3
1695	1	27	1695	2	6	hor		par		O-S			3		3
1695	1	28	1695	2	7	suh dots		1		O		1	2		2
1695	1	29	1695	2	8	dots hor		1		mixed		1	3		3
1695	1	30	1695	2	9	dots hor		1		mixed NO		1	3		3
1695	1	31	1695	2	10	hor		par		SSO			3		3
1695	2	1	1695	2	11	hor suh hor		par		S W			2		2
1695	2	2	1695	2	12	hor		par		W			3		3
1695	2	3	1695	2	13	hor		c		W			3	3	3	3
1695	2	4	1695	2	14	hor		c		NW			3	3	3	3
1695	2	5	1695	2	15	dots suh		par		W		1	2		2
1695	2	6	1695	2	16	dots suh		par		SW		1	2		2
1695	2	7	1695	2	17	sue		par		S			1		1
1695	2	8	1695	2	18	sue		par		S			1		1
1695	2	9	1695	2	19	sue		par		S			1		1
1695	2	10	1695	2	20	hor		1		O			3		3
1695	2	11	1695	2	21	suh cl		par		S			2		2
1695	2	12	1695	2	22	hor dots		par		O mixed		1	3		3
1695	2	13	1695	2	23	dots suh		par		SO		1	2		2
1695	2	14	1695	2	24	hor c p		par		W		2	3		3
1695	2	15	1695	2	25	c p sue		1		W		2	2		2
1695	2	16	1695	2	26	suh cl		1		W			2		2
1695	2	17	1695	2	27	p suh cl		1		W		2	2		2
1695	2	18	1695	2	28	p		1		SW		2
1695	2	19	1695	3	1	p suh cl		1		NW		2	2		2
1695	2	20	1695	3	2	sue		2		O NW			1		1
1695	2	21	1695	3	3	sue p		3		S W		2	2		2
1695	2	22	1695	3	4	hor p		1		W		2	3		3
1695	2	23	1695	3	5	hor p		1		W		2	3		3
1695	2	24	1695	3	6	hor		par		W			3		3
1695	2	25	1695	3	7	dots sue		1		O		1	2		2
1695	2	26	1695	3	8	hor p		1		S		2	3		3
1695	2	27	1695	3	9	hor		par		S SW			3		3
1695	2	28	1695	3	10	hor p		par		W		2	3		3
1695	3	1	1695	3	11	cl sur		c		W			2	3	2	3
1695	3	2	1695	3	12	suh cl		par		S			2		2
1695	3	3	1695	3	13	cl suq hor dots		par		S O		1	2		2
1695	3	4	1695	3	14	hor suq		par		W NW			2		2
1695	3	5	1695	3	15	p suq		par		W NW		2	2		2
1695	3	6	1695	3	16	p suh cl		par		W		2	2		2
1695	3	7	1695	3	17	sue cl		par		S W			2		2
1695	3	8	1695	3	18	sue		par		O			1		1
1695	3	9	1695	3	19	sue		par		NO O			1		1
1695	3	10	1695	3	20	sur cl		par		O			2		2
1695	3	11	1695	3	21	suh cl		par		mixed			2		2
1695	3	12	1695	3	22	dots hor dots hor		par		S W		1	3		3
1695	3	13	1695	3	23	dots suh cl		par		SO		1	2		2
1695	3	14	1695	3	24	dots suq		par		SO S			2		2
1695	3	15	1695	3	25	hor		par		S			3		3
1695	3	16	1695	3	26	dots hor		par		SO		1	3		3
1695	3	17	1695	3	27	c cl sur		par		N O			2		2
1695	3	18	1695	3	28	c cl sur		par		W			2		2
1695	3	19	1695	3	29	sue		par		O			1		1
1695	3	20	1695	3	30	cl sur		par		O			2		2
1695	3	21	1695	3	31	hor p		1		O		2	3		3
1695	3	22	1695	4	1	hor		par		O			3		3
1695	3	23	1695	4	2	hor		par		mixed			3		3
1695	3	24	1695	4	3	hor		par		NO			3		3
1695	3	25	1695	4	4	suh		par		NO			2		2
1695	3	26	1695	4	5	cl sur		par		O			2		2
1695	3	27	1695	4	6	cl sur		par p		O		2	2	3	2	3
1695	3	28	1695	4	7	cl sur		1 p		O		2	2		2
1695	3	29	1695	4	8	cl sur		1		O			2		2
1695	3	30	1695	4	9	cl sur		1		O			2		2
1695	3	31	1695	4	10	hor		1		mixed NW			3		3
1695	4	1	1695	4	11	p		1		NW SO		2
1695	4	2	1695	4	12	su cl		par		O			2		2
1695	4	3	1695	4	13	su cl		par		O			2		2
1695	4	4	1695	4	14	su cl		par		O			2		2
1695	4	5	1695	4	15	cl sur		c		O			2	3	2	3
1695	4	6	1695	4	16	su cl		par		O			2		2
1695	4	7	1695	4	17	sue		1		O NO			1		1
1695	4	8	1695	4	18	su		par		O			1		1
1695	4	9	1695	4	19	suh cl		par		O			2		2
1695	4	10	1695	4	20	hor		par		O			3		3
1695	4	11	1695	4	21	hor sur cl		par		W			2		2
1695	4	12	1695	4	22	suh cl		par		SO			2		2
1695	4	13	1695	4	23	suh cl		par		SW			2		2
1695	4	14	1695	4	24	suh cl		par		SO SW			2		2
1695	4	15	1695	4	25	suh cl		par		SO SW			2		2
1695	4	16	1695	4	26	suh cl		par		SO W			2		2
1695	4	17	1695	4	27	suh cl		dotted	grando | tonitru	O		1	2		2	2
1695	4	18	1695	4	28	suh cl		dotted		O		1	2		2	2
1695	4	19	1695	4	29	suh cl				O			2		2
1695	4	20	1695	4	30	suh cl		dotted		O		1	2		2	2
1695	4	21	1695	5	1	suh cl		dotted		O W		1	2		2	2
1695	4	22	1695	5	2	cl suh				W			2		2
1695	4	23	1695	5	3	suh cl		dotted		O W		1	2		2	2
1695	4	24	1695	5	4	suh cl		dotted		S O		1	2		2	2
1695	4	25	1695	5	5	suh cl		dotted		mixed		1	2		2	2
1695	4	26	1695	5	6	suh cl		dotted dia		mixed		1	2		2	3
1695	4	27	1695	5	7	suh cl		dotted		NW		1	2		2	2
1695	4	28	1695	5	8	suq cl		dia c		mixed NW		1	2	3	2	3
1695	4	29	1695	5	9	wave		dotted c		NW		1		3	3	3
1695	4	30	1695	5	10	suh		dia		W		1	2	3	2	3
1695	5	1	1695	5	11	diag suh		wave		W			2	3	2	3
1695	5	2	1695	5	12	diag		par		W					3
1695	5	3	1695	5	13	diag		par		W					3
1695	5	4	1695	5	14	diag		par		W					3
1695	5	5	1695	5	15	hor suq		par		W SW			2		2
1695	5	6	1695	5	16	suh		c		O W			2	3	2	3
1695	5	7	1695	5	17	suh				S			2		2
1695	5	8	1695	5	18	suh		dia		S		1	2	3	2	3
1695	5	9	1695	5	19	suh cl				S			2		2
1695	5	10	1695	5	20	suh cl		dotted		SO		1	2		2	2
1695	5	11	1695	5	21	suh cl				O			2		2
1695	5	12	1695	5	22	hor		dia		W		1	3	3	3	3
1695	5	13	1695	5	23	diag		suh cl		W				2	3	2
1695	5	14	1695	5	24	suh cl		hor		O			2	3	2	3
1695	5	15	1695	5	25	suh		c		O			2	3	2	3
1695	5	16	1695	5	26	suh cl		c		O			2	3	2	3
1695	5	17	1695	5	27	suh cl		dotted		O W		1	2		2	2
1695	5	18	1695	5	28	suh cl				NW NO			2		2
1695	5	19	1695	5	29	suh cl				O N			2		2
1695	5	20	1695	5	30	suh cl				O			2		2
1695	5	21	1695	5	31	suh cl				W			2		2
1695	5	22	1695	6	1	suh cl				NO			2		2
1695	5	23	1695	6	2	suh cl				N			2		2
1695	5	24	1695	6	3	sue				O			1		1
1695	5	25	1695	6	4	sue				O			1		1
1695	5	26	1695	6	5	su				O			1		1
1695	5	27	1695	6	6	su				O			1		1
1695	5	28	1695	6	7	su				O			1		1
1695	5	29	1695	6	8	suh		cl dia		O W		1	2	3	2	3
1695	5	30	1695	6	9	diag		c suh		W				2	3	2
1695	5	31	1695	6	10	hor				W			3		3
1695	6	1	1695	6	11	diag		suq		W				2	3	2
1695	6	2	1695	6	12	diag				O N					3
1695	6	3	1695	6	13	su cl				N			2		2
1695	6	4	1695	6	14	e			frigy	N
1695	6	5	1695	6	15	hor		dotted		N NW		1	3		3	2
1695	6	6	1695	6	16	hor		dia		NS		1	3	3	3	3
1695	6	7	1695	6	17	hor suq		dia		W		1	2	3	2	3
1695	6	8	1695	6	18	suh		su		NO			2	1	2	1
1695	6	9	1695	6	19	suh cl				W			2		2
1695	6	10	1695	6	20	suh cl			frigy	N			2		2
1695	6	11	1695	6	21	su				NO			1		1
1695	6	12	1695	6	22	su cl				NO			2		2
1695	6	13	1695	6	23	suh cl				NW			2		2
1695	6	14	1695	6	24	suh cl			calid	W			2		2
1695	6	15	1695	6	25	suh		su	calid	W N			2	1	2	1
1695	6	16	1695	6	26	su			calid	N			1		1
1695	6	17	1695	6	27	diag		suh		W				2	3	2
1695	6	18	1695	6	28	su				NO			1		1
1695	6	19	1695	6	29	suh cl				O			2		2
1695	6	20	1695	6	30	dots		suh		W				2	2	2
1695	6	21	1695	7	1	dots		suq		W				2	2	2
1695	6	22	1695	7	2	suh		cl		NO			2	3	2	3
1695	6	23	1695	7	3	suh cl				OS			2		2
1695	6	24	1695	7	4	hor		suq		W W-S			3	2	3	2
1695	6	25	1695	7	5	suh				W-S			2		2
1695	6	26	1695	7	6	suh				W			2		2
1695	6	27	1695	7	7	hor		c		W			3	3	3	3
1695	6	28	1695	7	8	hor		dia		W		1	3	3	3	3
1695	6	29	1695	7	9	diag		c suh		NW				2	3	2
1695	6	30	1695	7	10	suh				N			2		2
1695	7	1	1695	7	11	hor		suq		mixed N			3	2	3	2
1695	7	2	1695	7	12	hor		dia		W		1	3	3	3	3
1695	7	3	1695	7	13	diag		suq		NW				2	3	2
1695	7	4	1695	7	14	hor			frigy	NW			3		3
1695	7	5	1695	7	15	hor suh			frigy	NW			2		2
1695	7	6	1695	7	16	suh cl				NW			2		2
1695	7	7	1695	7	17	suh cl			temperat	NW			2		2
1695	7	8	1695	7	18	suh cl dots			temper	N		1	2		2
1695	7	9	1695	7	19	suh cl			calid	O S			2		2
1695	7	10	1695	7	20	dots			imber | fulgmerat	S		1			2	2
1695	7	11	1695	7	21	suh			temperatus | tonitru | imber	SO O		1	2		2	2
1695	7	12	1695	7	22	suh			calid | tonitrus | amplus	NW		1	2		2	2
1695	7	13	1695	7	23	suh cl			calid	O			2		2
1695	7	14	1695	7	24		tempestas fulg.| tonitru $[		]tempestas fulg.| tonitru $	mixed O		1			2	2
1695	7	15	1695	7	25	diag			pluvia	W		1			3	3
1695	7	16	1695	7	26	diag		suq	pluvia	NO				2	3	2
1695	7	17	1695	7	27	suh cl	nebula			O			2		2
1695	7	18	1695	7	28	su		c	pluvia	O SW W		1	1	3	1	3
1695	7	19	1695	7	29		pluvia | $		serenitas | humida | nocturna	SW		1			3	1
1695	7	20	1695	7	30	diag	per intervalla[	hor	]per intervallla	SW		1		3	3	3
1695	7	21	1695	7	31	hor		suq		W			3	2	3	2
1695	7	22	1695	8	1		pluvia | $ plus radii [solaris]			W		1			2
1695	7	23	1695	8	2	hor suq			pluvia	N		1	2		2	3
1695	7	24	1695	8	3		pluvia per | invtervalla[		]pluvia per | invtervalla	W		1			2	2
1695	7	25	1695	8	4		larga pluvia[		]larga pluvia	SO SW		1			3	3
1695	7	26	1695	8	5		pluvia per | invtervalla[		]pluvia per | invtervalla	W		1			2	2
1695	7	27	1695	8	6		pluvia		frigy	NW		1			3
1695	7	28	1695	8	7	suh	pluvia		frigy	W S		1	2		2
1695	7	29	1695	8	8		pluvia	suh		W NO		1		2	3	2
1695	7	30	1695	8	9		pluvia tonitru[		]pluvia tonitru	SO		1			2	2
1695	7	31	1695	8	10	diag		suh		W				2	3	2
1695	8	1	1695	8	11		pluvia		calid	NW mixed		1			3
1695	8	2	1695	8	12	suh cl			calid	O			2		2
1695	8	3	1695	8	13	suh cl			calid | moderate	W			2		2
1695	8	4	1695	8	14	suh cl			calido	W			2		2
1695	8	5	1695	8	15		pluvia cum | tonitru	suq hor		W		1		2	2	2
1695	8	6	1695	8	16		pluvia larga [2 columns]	suq		SW		1		2	3	2
1695	8	7	1695	8	17		pluvia [2 columns]			W		1			3
1695	8	8	1695	8	18	hor			pluvia	NW		1	3		3	3
1695	8	9	1695	8	19		larga pluvia cum interlu | centib.s rad. solis. [3 columns]			SW NW		1			2
1695	8	10	1695	8	20		pluvia per | intervalla [2 columns]		frigy	NW		1			2
1695	8	11	1695	8	21		pluvia per | intervalla [2 columns]		frigy	W		1			2
1695	8	12	1695	8	22		nebula	suh cl		O	frigy			2	3	2
1695	8	13	1695	8	23	su				O S			1		1
1695	8	14	1695	8	24		pluvia	suh		S W		1		2	3	2
1695	8	15	1695	8	25	suh cl			frigy	S NW N			2		2
1695	8	16	1695	8	26	su		cl		SO			1	3	1	3
1695	8	17	1695	8	27	su			temperate | calido	SO W			1		1
1695	8	18	1695	8	28	su			calid.	SO			1		1
1695	8	19	1695	8	29	suh	[previous night: pluvia nocturna][2 columns] [calor nimig.][2 columns]	hor		SW		1	2	3	2	3
1695	8	20	1695	8	30	suh cl	[previous night: pluvia nocturna][2 columns]		temperate calidum	W		1	2		2
1695	8	21	1695	8	31	suh		hor	pluvia	O SO		1	2	3	2	3
1695	8	22	1695	9	1	hor			pluvia	S		1	3		3	3
1695	8	23	1695	9	2		pluvia [2 columns]	suq		S		1		2	3	2
1695	8	24	1695	9	3		pluvia [2 columns]			S		1			3
1695	8	25	1695	9	4		subfrigid. pluvia [2 columns]			SW		1			3
1695	8	26	1695	9	5		pluvia [2 columns]			W		1			3
1695	8	27	1695	9	6		pluvia larga [2 columns]	suq		NO		1		2	3	2
1695	8	28	1695	9	7	cl dots		suq		W			3	2	3	2
1695	8	29	1695	9	8	suq dots		hor		SW			2	3	2	3
1695	8	30	1695	9	9	dots hor				SW			3		3
1695	8	31	1695	9	10	suq hor			calid	S W			2		2
1695	9	1	1695	9	11		pluvia | per in | tervalla		calid. | frigid	SW		1			2
1695	9	2	1695	9	12	suh cl				S			2		2
1695	9	3	1695	9	13	diag	subfrigid[	hor	]subfrigid	S	pluvia larga	1		3	3	3
1695	9	4	1695	9	14		pluvia[		]pluvia | grando | frigy	S W		1			3	3
1695	9	5	1695	9	15	c			pluvia| frigy	W		1				3
1695	9	6	1695	9	16	dots			frigy	NW					2
1695	9	7	1695	9	17		pluvia per | intervalla[		]pluvia per | intervalla	W	frigy	1			2	2
1695	9	8	1695	9	18		pluvia	hor		S		1		3	3	3
1695	9	9	1695	9	19		pluvia	hor		SO		1		3	3	3
1695	9	10	1695	9	20		pluvia	hor		NW		1		3	3	3
1695	9	11	1695	9	21	c	pluvia per | intervalla[		]pluvia per | intervalla	W		1			2	2
1695	9	12	1695	9	22		pluvia per | intervalla[		]pluvia per | intervalla	NW		1			2	2
1695	9	13	1695	9	23		pluvia			W		1			3
1695	9	14	1695	9	24		pluvia continua[		]pluvia continua	W		1			3	3
1695	9	15	1695	9	25	hor	tranquillitas			NW			3		3
1695	9	16	1695	9	26		nebula | tranquillitas[		]nebula | tranquillitas	NO					3
1695	9	17	1695	9	27	su				O			1		1
1695	9	18	1695	9	28	su				SO			1		1
1695	9	19	1695	9	29	suh cl			calid	S SW			2		2
1695	9	20	1695	9	30		pluvia	hor	calida	S		1		3	3	3
1695	9	21	1695	10	1		nebula	suh		mixed O				2	3	2
1695	9	22	1695	10	2	su			$				1		1
1695	9	23	1695	10	3	su		hor		O			1	3	1	3
1695	9	24	1695	10	4	suh		hor		O W			2	3	2	3
1695	9	25	1695	10	5	suh			pluvia	SO S		1	2		2	3
1695	9	26	1695	10	6	hor		dotted		W		1	3		3	2
1695	9	27	1695	10	7	hor			larga pluvia	W		1	3		3	3
1695	9	28	1695	10	8		pluvia	c		W		1		3	3	3
1695	9	29	1695	10	9	suh cl			frigy	NW			2		2
1695	9	30	1695	10	10	suh cl			frigy	NO			2		2
1695	10	1	1695	10	11	sue				O			1		1
1695	10	2	1695	10	12	su cl				O S			2		2
1695	10	3	1695	10	13		pluvia nocturna[ | pluvia per intervalla[		]pluvia nocturna[ | ]pluvia per intervalla	W	]pluvia nocturna	1			2	2
1695	10	4	1695	10	14		nebula	su		O				1	3	1
1695	10	5	1695	10	15		nebula	su		O				1	3	1
1695	10	6	1695	10	16		nebula	su		O				1	3	1
1695	10	7	1695	10	17		nebula	suh		S				2	3	2
1695	10	8	1695	10	18	hor				NO			3		3
1695	10	9	1695	10	19	hor				O			3		3
1695	10	10	1695	10	20	su				O			1		1
1695	10	11	1695	10	21	su				N O			1		1
1695	10	12	1695	10	22	su				O			1		1
1695	10	13	1695	10	23		nebula			mixed					3
1695	10	14	1695	10	24		nebula			mixed					3
1695	10	15	1695	10	25		nebula			mixed					3
1695	10	16	1695	10	26	hor		su		mixed			3	1	3	1
1695	10	17	1695	10	27		nebula	su		O				1	3	1
1695	10	18	1695	10	28		nebula	suh		O SW				2	3	2
1695	10	19	1695	10	29	hor		suh		NW NO			3	2	3	2
1695	10	20	1695	10	30		nebula	suh		NO				2	3	2
1695	10	21	1695	10	31		nebula	su		O				1	3	1
1695	10	22	1695	11	1	su			temperat.	O			1		1
1695	10	23	1695	11	2	su			temperat	O N			1		1
1695	10	24	1695	11	3	hor			temperat	mixed N			3		3
1695	10	25	1695	11	4	hor			temperat	O			3		3
1695	10	26	1695	11	5	su			temperat	O			1		1
1695	10	27	1695	11	6	hor				O NW			3		3
1695	10	28	1695	11	7	hor				mixed			3		3
1695	10	29	1695	11	8	hor		su		O			3	1	3	1
1695	10	30	1695	11	9		nebula	hor		O				3	3	3
1695	10	31	1695	11	10		nebula	hor		O				3	3	3
1695	11	1	1695	11	11	hor			tepid	SO			3		3
1695	11	2	1695	11	12	hor				SO mixed			3		3
1695	11	3	1695	11	13	hor				SO			3		3
1695	11	4	1695	11	14	hor			tepid	SO			3		3
1695	11	5	1695	11	15		nebula	hor		mixed				3	3	3
1695	11	6	1695	11	16		nebula	hor		SW				3	3	3
1695	11	7	1695	11	17	hor				SO			3		3
1695	11	8	1695	11	18	hor		su		SO			3	1	3	1
1695	11	9	1695	11	19	su				SO			1		1
1695	11	10	1695	11	20	hor				SO			3		3
1695	11	11	1695	11	21	hor			pluvia | parca	S		1	3		3	3
1695	11	12	1695	11	22	sue			frigid	NO			1		1
1695	11	13	1695	11	23	su				O			1		1
1695	11	14	1695	11	24	suh		hor		S			2	3	2	3
1695	11	15	1695	11	25		nebula	hor		S SW				3	3	3
1695	11	16	1695	11	26	hor			temperat	SO			3		3
1695	11	17	1695	11	27	hor			temperat	SO			3		3
1695	11	18	1695	11	28	hor				S			3		3
1695	11	19	1695	11	29	hor				O			3		3
1695	11	20	1695	11	30	hor				O			3		3
1695	11	21	1695	12	1	hor				O			3		3
1695	11	22	1695	12	2	su				O			1		1
1695	11	23	1695	12	3	su				O			1		1
1695	11	24	1695	12	4	suh				O			2		2
1695	11	25	1695	12	5	suh				O			2		2
1695	11	26	1695	12	6	su				O			1		1
1695	11	27	1695	12	7	hor		su		SO			3	1	3	1
1695	11	28	1695	12	8	su				O			1		1
1695	11	29	1695	12	9		pluvia minuta	su		SO		1		1	2	1
1695	11	30	1695	12	10	su				O			1		1
1695	12	1	1695	12	11	su			temperat	SO			1		1
1695	12	2	1695	12	12	su		xi	temperat	SO			1		1
1695	12	3	1695	12	13	hor		su		SO			3	1	3	1
1695	12	4	1695	12	14	hor				SO			3		3
1695	12	5	1695	12	15	hor		suh		mixed			3	2	3	2
1695	12	6	1695	12	16	hor		suh		S			3	2	3	2
1695	12	7	1695	12	17	hor			Schnee	O W		2	3		3	3
1695	12	8	1695	12	18	hor				O			3		3
1695	12	9	1695	12	19	hor				O			3		3
1695	12	10	1695	12	20	hor			nix	N		2	3		3
1695	12	11	1695	12	21	hor		sue		NW			3	1	3	1
1695	12	12	1695	12	22	su			frigy	O			1		1
1695	12	13	1695	12	23	su		hor	frigg	O			1	3	1	3
1695	12	14	1695	12	24	hor			frigg	O			3		3
1695	12	15	1695	12	25	hor			nix	NO W		2	3		3	3
1695	12	16	1695	12	26	hor				W			3		3
1695	12	17	1695	12	27	hor				W			3		3
1695	12	18	1695	12	28	hor				S SW			3		3
1695	12	19	1695	12	29	hor				SW			3		3
1695	12	20	1695	12	30	hor		suh	temperat	SO			3	2	3	2
1695	12	21	1695	12	31	su				O			1		1
1695	12	22	1696	1	1	su			intens. frigy	O			1		1
1695	12	23	1696	1	2	su			intens. Frigy	O			1		1
1695	12	24	1696	1	3	su			remissuy frigy	SO			1		1
1695	12	25	1696	1	4	suh			temperat	SO			2		2
1695	12	26	1696	1	5	su			temper.	O			1		1
1695	12	27	1696	1	6	hor			nix	S		2	3		3	3
1695	12	28	1696	1	7	hor		suh	temperat	SO			3	2	3	2
1695	12	29	1696	1	8	hor			tepidy	S W			3		3
1695	12	30	1696	1	9	suh			tepidy	W			2		2
1695	12	31	1696	1	10	suh			frigy	SO S	pluvia		2		2
1696	1	1	1696	1	11	hor			tepidy	S			3		3
1696	1	2	1696	1	12	suh			tepidy	S			2		2
1696	1	3	1696	1	13	su			tepidy	S SW			1		1
1696	1	4	1696	1	14	su			mediocriter	SO			1		1
1696	1	5	1696	1	15	su			mediocr	SO			1		1
1696	1	6	1696	1	16	hor			tepid	SW			3		3
1696	1	7	1696	1	17	suh			tepid	W			2		2
1696	1	8	1696	1	18	su			temperat.	S			1		1
1696	1	9	1696	1	19		parum | nebula		temperat	S NO					3
1696	1	10	1696	1	20	hor			temperat	SW			3		3
1696	1	11	1696	1	21	hor	nebula		temperat:	mixed SO			3		3
1696	1	12	1696	1	22	su			temperat	mixed			1		1
1696	1	13	1696	1	23		nebula densa per | totum diem subfrigida[		]nebula densa per | totum diem subfrigida[		]nebula densa per | totum diem subfrigida				2	3
1696	1	14	1696	1	24	su			temperat	mixed			1		1
1696	1	15	1696	1	25	su			temperat	O			1		1
1696	1	16	1696	1	26		minuta | pluvia	suh		S		1		2	2	2
1696	1	17	1696	1	27		pluvia		venty | impetuosy	NW		1			3
1696	1	18	1696	1	28	hor			pluvia	S		1	3		3	3
1696	1	19	1696	1	29		pluvia	suh		SW		1		2	3	2
1696	1	20	1696	1	30		pluvia	sue		SO				1	3	1
1696	1	21	1696	1	31		temperaty	suh		SW				2		2
1696	1	22	1696	2	1	suh cl			temperat	S			2		2
1696	1	23	1696	2	2	hor	nivigit | parum	suh	temperat	SO		2	3	2	3	2
1696	1	24	1696	2	3	suh cl			temperat	SO			2		2
1696	1	25	1696	2	4		nivigit largiter[		]nivigit largiter	S		2			3	3
1696	1	26	1696	2	5	su			modiam | frigus	W			1		1
1696	1	27	1696	2	6	su			temperat	SO			1		1
1696	1	28	1696	2	7	hor			pluvia | minuta	S		1	3		3	2
1696	1	29	1696	2	8	suh			tepidy	S			2		2
1696	1	30	1696	2	9	suh			tepidus	S			2		2
1696	1	31	1696	2	10	su			tepidy	SO			1		1
1696	2	1	1696	2	11	suh hor			tepidy	S SW			2		2
1696	2	2	1696	2	12	suh			tepidy	SO			2		2
1696	2	3	1696	2	13	hor	frigidiusante | pluvia minuta[		]frigidiusante | pluvia minuta	mixed NW		1	3		3	2
1696	2	4	1696	2	14	hor		suq		W			3	2	3	2
1696	2	5	1696	2	15	hor			ventosus $	O			3		3
1696	2	6	1696	2	16	hor		suq		SW			3	2	3	2
1696	2	7	1696	2	17		largiter pluvit | nivigit[		]largiter pluvit | nivigit	W SW		3			3	3
1696	2	8	1696	2	18	suh			temperat	SO			2		2
1696	2	9	1696	2	19		nebula | densa[	suq	]nebula | densa	SO				2	3	2
1696	2	10	1696	2	20	hor		suq		SO			3	2	3	2
1696	2	11	1696	2	21	hor		suh		W mixed			3	2	3	2
1696	2	12	1696	2	22	su			temperat	O			1		1
1696	2	13	1696	2	23		nebula	su		O mixed				1	3	1
1696	2	14	1696	2	24	su			temperat	N mixed			1		1
1696	2	15	1696	2	25	hor			nebula | densa	mixed			3		3	3
1696	2	16	1696	2	26			su		W				1		1
1696	2	17	1696	2	27	hor			minuta | pluvia	W mixed		1	3		3	2
1696	2	18	1696	2	28			su		O W				1		1
1696	2	19	1696	2	29	hor				W			3		3
1696	2	20	1696	3	1			su		W				1		1
1696	2	21	1696	3	2			su		S mixed				1		1
1696	2	22	1696	3	3		calid	su		S				1		1
1696	2	23	1696	3	4		temperat	hor		W mixed				3		3
1696	2	24	1696	3	5		tepid	suh		W				2		2
1696	2	25	1696	3	6	hor			pluvia	W		1	3		3	2
1696	2	26	1696	3	7	suh cl				O mixed			2		2
1696	2	27	1696	3	8	su			temperat	O SO			1		1
1696	2	28	1696	3	9	suh				SO W			2		2
1696	2	29	1696	3	10	hor		suq	pluvia	N NO		1	3	2	3	2
1696	3	1	1696	3	11		nivis | parcum. | minuta | pluvia	suq		N NO		3		2	2	2
1696	3	2	1696	3	12		nebula	suh		NO				2	3	2
1696	3	3	1696	3	13	su		hor		NO W			1	3	1	3
1696	3	4	1696	3	14		Nivigit tota die[		]Nivigit tota die	N		2			3	3
1696	3	5	1696	3	15		nivigit[		]nivigit	N NO NW		2			3	3
1696	3	6	1696	3	16	suq			nivigit	NO NW		2	2		2	3
1696	3	7	1696	3	17	suh			frigy	N			2		2
1696	3	8	1696	3	18	su			frigy	O NO			1		1
1696	3	9	1696	3	19	hor				O SO			3		3
1696	3	10	1696	3	20	hor			frigus	NO			3		3
1696	3	11	1696	3	21		nivigit frigy[		]nivigit frigy	N NO		2			3	3
1696	3	12	1696	3	22		nivigit frigy[		]nivigit frigy	N NW		2			3	3
1696	3	13	1696	3	23	hor		suq	frigy	NO			3	2	3	2
1696	3	14	1696	3	24		tota die nivigit[		]tota die nivigit | frigus	O		2			3	3
1696	3	15	1696	3	25		tota die nivigit[		]tota die nivigit | frigy	O		2			3	3
1696	3	16	1696	3	26	suq			frigus | intensus	O			2		2
1696	3	17	1696	3	27	hor	frigus		ventus | validy	O			3		3
1696	3	18	1696	3	28	suh		hor	calida	S SW			2	3	2	3
1696	3	19	1696	3	29	suh		hor		S SO			2	3	2	3
1696	3	20	1696	3	30	suh	ventus | impetuosus cum | pluvia[		]ventus | impetuosus cum | pluvia	S SW			2		2	3
1696	3	21	1696	3	31	suh		hor	tepidy äer	SW			2	3	2	3
1696	3	22	1696	4	1		nivigit tota die | cum vents impetuosy[		]nivigit tota die | cum vents impetuosy	NO		2			3	3
1696	3	23	1696	4	2		nivigit		frigus	NO		2			3
1696	3	24	1696	4	3	hor			intensu | frigy	O			3		3
1696	3	25	1696	4	4	hor			frigy	NO			3		3
1696	3	26	1696	4	5	hor			frigy	NO			3		3
1696	3	27	1696	4	6	suh			temperat	O			2		2
1696	3	28	1696	4	7	su			ventus | validus	O			1		1
1696	3	29	1696	4	8	su			temperat	O			1		1
1696	3	30	1696	4	9	suh	pluvia nocturna[		calidy | ]pluvia nocturna	O S		1	2		2	3
1696	3	31	1696	4	10		pluvia minuta	suh		W		1		2	2	2
1696	4	1	1696	4	11	suh cl			temperat	O N			2		2
1696	4	2	1696	4	12	su			temperat	O			1		1
1696	4	3	1696	4	13	hor		suq		W			3	2	3	2
1696	4	4	1696	4	14	suh		hor		O S W NW			2	3	2	3
1696	4	5	1696	4	15	suh		hor	minuta | pluvia	NW		1	2	3	2	3
1696	4	6	1696	4	16		pluvia tota | die[		]pluvia tota | die	NW N		1			3	3
1696	4	7	1696	4	17	hor				NO			3		3
1696	4	8	1696	4	18		pluvia per | intervalla[		]pluvia per | intervalla	O		1			2	2
1696	4	9	1696	4	19	su			ventus | validus	O			1		1
1696	4	10	1696	4	20	su			ventus | validy	O			1		1
1696	4	11	1696	4	21	su		cl		O			1	3	1	3
1696	4	12	1696	4	22	su			frigy	O			1		1
1696	4	13	1696	4	23	su cl			frigy | venty | impetuosy	O			2		2
1696	4	14	1696	4	24	su cl			frigy	N			2		2
1696	4	15	1696	4	25	su cl			frigy	O			2		2
1696	4	16	1696	4	26	su			temperat	O			1		1
1696	4	17	1696	4	27	suh		hor		SO			2	3	2	3
1696	4	18	1696	4	28	suh			pluvia	W		1	2		2	3
1696	4	19	1696	4	29		pluvia per | intervalla[		]pluvia per | intervalla	W		1			2	2
1696	4	20	1696	4	30		pluvia et | parum nix | cum venty | impetuosy[		]pluvia et | parum nix | cum venty | impetuosy	NW		3			3	3
1696	4	21	1696	5	1	su				W			1		1
1696	4	22	1696	5	2	su				S W N			1		1
1696	4	23	1696	5	3	su			tranquilly äer	mixed			1		1
1696	4	24	1696	5	4	su			tranquill	W			1		1
1696	4	25	1696	5	5	su			tranquill	W SO SW			1		1
1696	4	26	1696	5	6	suh cl			temperstas | tonitru | fulgu | pluvia	SW		1	2		2	2
1696	4	27	1696	5	7	cl			parum pluvit	W		1	3		3	3
1696	4	28	1696	5	8	suh				S SW			2		2
1696	4	29	1696	5	9	su			egregie | serenum	O			1		1	1
1696	4	30	1696	5	10								2		2
1696	5	1	1696	5	11	su			tempestas | nocturna	O			1		1
1696	5	2	1696	5	12	suh			valide pivat[	O	]valide pivat	1	2		2	3
1696	5	3	1696	5	13	hor		su		O			3	1	3	1
1696	5	4	1696	5	14		minuta | pluvia	suh		mixed		1		2	2	2
1696	5	5	1696	5	15		large | pluvia | ante | $ [solaris]	suh	minuta pluvia[	mixed	]minuta pluvia	1		2	2	2
1696	5	6	1696	5	16		largitoso | pluit[	suh	]largitoso | pluit	W O		1		2	3	2
1696	5	7	1696	5	17	su				O			1		1
1696	5	8	1696	5	18	su			minuta | pluvia	O N		1	1		1	2
1696	5	9	1696	5	19	suh				mixed			2		2
1696	5	10	1696	5	20	hor	pluvia nocturna[	su	]pluvia nocturna	O		1	3	1	3	1
1696	5	11	1696	5	21	hor		suh cl	pluvia	O		1	3	2	3	2
1696	5	12	1696	5	22	suh				O			2		2
1696	5	13	1696	5	23	suh cl			$	O			2		2
1696	5	14	1696	5	24	suh				NO			2		2
1696	5	15	1696	5	25	su				O			1		1
1696	5	16	1696	5	26	su				O			1		1
1696	5	17	1696	5	27	hor		suh		W NW			3	2	3	2
1696	5	18	1696	5	28	suh			tempestas | tonitru | larga pluvia	NW S		1	2		2	2
1696	5	19	1696	5	29		larga pluvia | per intervalla[		]larga pluvia | per intervalla	NW		1			2	2
1696	5	20	1696	5	30		pluvia	hor suh		N		1		2	3	2
1696	5	21	1696	5	31	su				NO			1		1
1696	5	22	1696	6	1	suh		hor		SO			2	3	2	3
1696	5	23	1696	6	2	suh		hor		SO W			2	3	2	3
1696	5	24	1696	6	3		pluvia larga[		]pluvia larga	W		1			3	3
1696	5	25	1696	6	4		pluvia			W		1			3
1696	5	26	1696	6	5		pluvia | contunia	suh	per in | tervalla	NO		1		2	3	2
1696	5	27	1696	6	6		nebula	suh		O				2	3	2
1696	5	28	1696	6	7	hor			minuta | pluvia	O		1	3		3	2
1696	5	29	1696	6	8		continua pluvia[		]continua pluvia	O		1			3	3
1696	5	30	1696	6	9		minuta | pluvia	suq	frigy	O		1		2	2	2
1696	5	31	1696	6	10	hor			frigy	O NO			3		3
1696	6	1	1696	6	11	su				O			1		1
1696	6	2	1696	6	12	suh		hor	pluvia	SO			2	3	2	3
1696	6	3	1696	6	13		[previous night: tonitru praeedente nocte][ | pluvia per intervalla[		][previous night: tonitru praeedente nocte] ]| pluvia per intervalla[	SW		1			2	2
1696	6	4	1696	6	14		pluvia per intervalla[		]pluvia per intervalla	SO		1			2	2
1696	6	5	1696	6	15		pluvia | larga pluvia[		]larga pluvia	O W		1			3	3
1696	6	6	1696	6	16		minuta pluvia | per intervalla[		]minuta pluvia | per intervalla	SW W		1			2	2
1696	6	7	1696	6	17		pluvia per intervalla[		]pluvia per intervalla	SW W		1			2	2
1696	6	8	1696	6	18		pluvia per | intervalla | cum tonitru[		]pluvia per | intervalla | cum tonitru	W		1			2	2
1696	6	9	1696	6	19	hor			interlu | centes radii [solaris]	N NW			3		3	2
1696	6	10	1696	6	20		pluvia cum | interlucentily | radiis[		]pluvia cum | interlucentily | radiis [solaris]	W		1			2	2
1696	6	11	1696	6	21		pluvia per | totum $ diem[		]pluvia per | totum $ diem	W		1			2	3
1696	6	12	1696	6	22		minuta pluvia [	hor	]minuta pluvia	W		1		3	2	3
1696	6	13	1696	6	23	suh				SW			2		2
1696	6	14	1696	6	24	suh cl				W			2		2
1696	6	15	1696	6	25	suh			nimis | calidum | pluvia	W		1	2		2	3
1696	6	16	1696	6	26	suh	[previous night: pluvia nocturna][		][previous night: pluvia nocturna] temperate | calidum	S W			2		2	2
1696	6	17	1696	6	27	suh			tempestas nocturna | tempestus modica	SW			2		2
1696	6	18	1696	6	28	suh			tempestus | modica	W		1	2		2
1696	6	19	1696	6	29	hor			pluvia	N		1	3		3	3
1696	6	20	1696	6	30	hor			pluvia	NW		1	3		3	3
1696	6	21	1696	7	1	suh			minuta | pluvia	W		1	2		2	2
1696	6	22	1696	7	2	suh			aer | turbidy	W			2		2
1696	6	23	1696	7	3	suh			tempestus | frigidiusante	W		1	2		2
1696	6	24	1696	7	4		pluvia cum | interlucentily | radiys solis[		]pluvia cum | interlucentily | radiys solis	S		1			2	3
1696	6	25	1696	7	5	hor			frigidy | aer	NW			3		3
1696	6	26	1696	7	6	hor			pluvit | $	W		1	3		3	3
1696	6	27	1696	7	7	suh			frigidiusante	NW			2		2
1696	6	28	1696	7	8	suh	minuta pluvia[	hor	]minuta pluvia	W		1	2	3	2	3
1696	6	29	1696	7	9	suh	minuta | pluvia frigy | ventus impetuosus[		]minuta | pluvia frigy | ventus impetuosus	NW		1	2		2	2
1696	6	30	1696	7	10		coelum varium | cum frequenti | pluvia[		]coelum varium | cum frequenti | pluvia	NW		1			2	2
1696	7	1	1696	7	11	suh			tranquilly aer	mnixed			2		2
1696	7	2	1696	7	12	su			temperat	mixed SO			1		1
1696	7	3	1696	7	13	su cl			calidum	SW			2		2
1696	7	4	1696	7	14	su			eximie | serenum	W			1		1	1
1696	7	5	1696	7	15	su			moderate | calidum	W			1		1
1696	7	6	1696	7	16	su		cl	temperat	NW			1	3	1	3
1696	7	7	1696	7	17	suh cl			temperat | pluvia | amoena | ante [solraris]| occ.	N	NB fatale incendium	1	2		2	2
1696	7	8	1696	7	18	su			nimius | calor | pluvia nocturna	W		1	1		1	3
1696	7	9	1696	7	19	su cl			nimius | aestus	S	minuta pluvia		2		2
1696	7	10	1696	7	20		pluvia per | intervalla[		tempestas nocturnas[ | ]pluvia per | intervalla	S	]tempestas nocturnas	1			2	2
1696	7	11	1696	7	21		tempestas vapida | pluviosa cum | $ | et asetu nimis[		]tempestas vapida | pluviosa cum | $ | et asetu nimis	S		1			3	3
1696	7	12	1696	7	22		Imber | calor remissior[		]Imber | calor remissior	W		1			3	3
1696	7	13	1696	7	23	suh cl			äer fri | gidy	W			2		2
1696	7	14	1696	7	24	suh	minuta pluvia[		validus ventus | et frigidy | ]minuta pluvia	W			2		2	2
1696	7	15	1696	7	25	suh			aer | temperaty	W			2		2
1696	7	16	1696	7	26	suh			serenitas	SO			2		2	1
1696	7	17	1696	7	27	su			temperat	W			1		1
1696	7	18	1696	7	28	su			temperat	SO			1		1
1696	7	19	1696	7	29		pluvia | cum frigore[		]pluvia | cum frigore	W		1			3	3
1696	7	20	1696	7	30				minuta pluvia | frigidiusanty aer	NW suh		1				2
1696	7	21	1696	7	31	suh			temperat	mixed			2		2
1696	7	22	1696	8	1	suh			temperat	mixed			2		2
1696	7	23	1696	8	2		minuta pluvia | per intervalla[		]minuta pluvia | per intervalla	S		1			2	2
1696	7	24	1696	8	3	suh			temperat	N			2		2
1696	7	25	1696	8	4	su			eximie | serenum	O			1		1	1
1696	7	26	1696	8	5	suh			pluvia | cum tonitru	O S W		1	2		2	2
1696	7	27	1696	8	6	suh cl				W N			2		2
1696	7	28	1696	8	7	suh				W			2		2
1696	7	29	1696	8	8	su			eximie | seren.	SO			1		1	1
1696	7	30	1696	8	9		pluvia			W		1			3
1696	7	31	1696	8	10	suh cl				mixed			2		2
1696	8	1	1696	8	11	suh			minuta | pluvia	W		1	2		2	2
1696	8	2	1696	8	12	suh			ventus | validy	W			2		2
1696	8	3	1696	8	13		ventus | validy		imber | aestus	W		1				2
1696	8	4	1696	8	14	su				NW			1		1
1696	8	5	1696	8	15	su cl			aestus | nimius	W			2		2
1696	8	6	1696	8	16		imber | pluvia	suq	frigidiusante	NW		1		2	3	2
1696	8	7	1696	8	17	suh cl			variy | aer	W			2		2	2
1696	8	8	1696	8	18	suh cl			variy | aer	W			2		2	2
1696	8	9	1696	8	19	hor		suh		NW			3	2	3	2
1696	8	10	1696	8	20	suh			impury | aer | aestus	W NO			2		2
1696	8	11	1696	8	21	hor			interlu | centes radii [solaris]	W			3		3	2
1696	8	12	1696	8	22	hor		suh	aer impury	W			3	2	3	2
1696	8	13	1696	8	23	su			aer im- | purus	S SW W N			1		1
1696	8	14	1696	8	24	su			impury | aer	mixed			1		1
1696	8	15	1696	8	25		pluvia cum | interlucentiby radiys [solaris]			W N	ventus | impetuosy	1			2
1696	8	16	1696	8	26	suh cl				N			2		2
1696	8	17	1696	8	27	su cl				mixed			2		2
1696	8	18	1696	8	28	su			calidum	mixed			1		1
1696	8	19	1696	8	29	su			aestus | nimius	SO S W			1		1
1696	8	20	1696	8	30		tempestas | pluvia | tonitru	su	aestus | nimius	mixed		1		1	2	1
1696	8	21	1696	8	31		tempestas nocturna | ventus imper | tuosus[		]tempestas nocturna | ventus impe | tuosus	W		1			2
1696	8	22	1696	9	1	hor			ventus | impetuosy	W			3		3
1696	8	23	1696	9	2		pluvia	hor suq		W		1		2	3	2
1696	8	24	1696	9	3	su			ventus | impetuosy	S W			1		1
1696	8	25	1696	9	4		ventus impetu | osus pluvia[		]ventus impetu | osus pluvia	S W					3	3
1696	8	26	1696	9	5	hor		suh	pluvia	W		1	3	2	3	2
1696	8	27	1696	9	6		pluvia per | intervalla[		]pluvia per | intervalla	S W		1			2	2
1696	8	28	1696	9	7	suh			venty | validy	W			2		2
1696	8	29	1696	9	8		pluvia | ventus frigidy | et impetuosy[	suh	]ventus frigidy | et impetuosy	S W		1		2	3	2
1696	8	30	1696	9	9	suh cl			aer tranquilly	W			2		2
1696	8	31	1696	9	10	su		hor		OW			1	3	1	3
1696	9	1	1696	9	11	hor			minuta | pluvia	NW		1	3		3	2
1696	9	2	1696	9	12	suh		cl		NW N NO			2	3	2	3
1696	9	3	1696	9	13	su				O mixed			1		1
1696	9	4	1696	9	14	suh cl			calor	mixed			2		2
1696	9	5	1696	9	15		minuta | pluvia per | intervalla[		]minuta | pluvia per | intervalla	W O		1			2	2
1696	9	6	1696	9	16	su cl			temperat	O			2		2
1696	9	7	1696	9	17	su			calor	O			1		1
1696	9	8	1696	9	18	su cl			temperat	O S			2		2
1696	9	9	1696	9	19	suh		hor		SW W			2	3	2	3
1696	9	10	1696	9	20	suh			calid	SW S			2		2
1696	9	11	1696	9	21	suh			ventosy | aer	W			2		2
1696	9	12	1696	9	22	suh			temperat	W			2		2
1696	9	13	1696	9	23	su			egregie | serenum	S			1		1	1
1696	9	14	1696	9	24	suh			pluvia | cum | tonitru	SO W		1	2		2	2
1696	9	15	1696	9	25	suq cl			panumper | frigid | aer	W			2		2
1696	9	16	1696	9	26	hor			pluvia	SW		1	3		3	3
1696	9	17	1696	9	27	hor			varium | coelum	S SO SW			3		3	2
1696	9	18	1696	9	28		pluvia nocturna | continua pluvia | tota die[		]pluvia nocturna | continua pluvia | tota die	N NO		1			3	3
1696	9	19	1696	9	29		continui pluit per | totam noctem | continua pluvia | tota die[		]continui pluit per | totam noctem | continua pluvia | tota die[	O SO mixed W	]continui pluit per | totam noctem | continua pluvia | tota die	1			2	3
1696	9	20	1696	9	30		pluit $[		]pluit $	W		1			3	3
1696	9	21	1696	10	1		pluvia cum | grandine[	suq	]pluvia cum | grandine	W		1		2	3	2
1696	9	22	1696	10	2	hor			minuta | pluvia	W		1	3		3	2
1696	9	23	1696	10	3	su			temperat	O			1		1
1696	9	24	1696	10	4		pluvia minuta[		]pluvia minuta	S SW		1			2	2
1696	9	25	1696	10	5	suh		hor		S			2	3	2	3
1696	9	26	1696	10	6		pluvia[		]pluvia	S SW		1			3	3
1696	9	27	1696	10	7		mediocrater | serenum[		]mediocrater | serenum	S					1	1
1696	9	28	1696	10	8	su			eximie | serenum	S			1		1	1
1696	9	29	1696	10	9	su			eximie | serenum | t calid	O			1		1	1
1696	9	30	1696	10	10	su	minuta nebula $		eximie | serenum	O			1		1	1
1696	10	1	1696	10	11	su			eximie | serenum	O			1		1	1
1696	10	2	1696	10	12	su			serenum	O			1		1	1
1696	10	3	1696	10	13	suh			imber	O		1	2		2	3
1696	10	4	1696	10	14	su			eximie | serenum	O			1		1	1
1696	10	5	1696	10	15	su			egregie | serenum	O			1		1	1
1696	10	6	1696	10	16	hor			minuta | pluvia	S W		1	3		3	2
1696	10	7	1696	10	17	hor			plinuta | pluvia | per inter | valla	S		1	3		3	2
1696	10	8	1696	10	18	suh		hor		O			2	3	2	3
1696	10	9	1696	10	19	suh		hor		O			2	3	2	3
1696	10	10	1696	10	20	suh	pluvia nocturna[	su	]pluvia nocturna[	W	]pluvia nocturna	1	2	1	2	1
1696	10	11	1696	10	21	su			$ | nubes	O			1		1	3
1696	10	12	1696	10	22		nebula | pluviosa[		]nebula | pluviosa	O mixed SW		1			3	3
1696	10	13	1696	10	23	hor		suh		O			3	2	3	2
1696	10	14	1696	10	24	su			nubus | volatiles | $	O			1		1	2
1696	10	15	1696	10	25	su				O mixed W			1		1
1696	10	16	1696	10	26		pluvia nebu | losa[	hor	]pluvia nebu | losa	S W		1		3	3	3
1696	10	17	1696	10	27	su				SO			1		1
1696	10	18	1696	10	28	su				SO			1		1
1696	10	19	1696	10	29	hor	minuta pluvia[		]minuta pluvia	mixed		1	3		3	2
1696	10	20	1696	10	30	hor				SW			3		3
1696	10	21	1696	10	31	hor				S			3		3
1696	10	22	1696	11	1	hor			nivis | partiato | ]impetuose flat	W		2	3		3	2
1696	10	23	1696	11	2	suh			temperat	S			2		2
1696	10	24	1696	11	3	suh				S SW			2		2
1696	10	25	1696	11	4		pluvia			W		1			3
1696	10	26	1696	11	5		minuta | pluvia	hor		S SW		1		3	2	3
1696	10	27	1696	11	6	suh			temperat	SW			2		2
1696	10	28	1696	11	7	suh			temperat	SW			2		2
1696	10	29	1696	11	8	su			temperat	mixed			1		1
1696	10	30	1696	11	9	su			temperat	mixed			1		1
1696	10	31	1696	11	10		nebula tota | die[		]nebula tota | die	O					3	3
1696	11	1	1696	11	11	hor			nebula	mixed			3		3	3
1696	11	2	1696	11	12		nebula	su		SO				1	3	1
1696	11	3	1696	11	13	su		cl		SO			1	3	1	3
1696	11	4	1696	11	14	suh		hor		NO			2	3	2	3
1696	11	5	1696	11	15	hor				S			3		3
1696	11	6	1696	11	16	hor		suh		SO			3	2	3	2
1696	11	7	1696	11	17	hor			minuta | pluvia	O		1	3		3	2
1696	11	8	1696	11	18	hor			pluvia | minuta | larga	SO NW		1	3		3	2
1696	11	9	1696	11	19		pluvia nivosa[		]pluvia nivosa	NW		3			3	3
1696	11	10	1696	11	20	hor		su		mixed			3	1	3	1
1696	11	11	1696	11	21	hor				S			3		3
1696	11	12	1696	11	22	hor				SO			3		3
1696	11	13	1696	11	23		pluvia noctorna[ | pluvia	hor	]pluvia nocturna	S		1		3	3	3
1696	11	14	1696	11	24		pluvia[		]pluvia	W		1			3	3
1696	11	15	1696	11	25		pluvia	hor		NW		1		3	3	3
1696	11	16	1696	11	26		parum nivis[		]parum nivis	NW		2			3	3
1696	11	17	1696	11	27	su			nubes | praeter- | volantes	O			1		1	2
1696	11	18	1696	11	28	su				SO			1		1
1696	11	19	1696	11	29	hor				SO			3		3
1696	11	20	1696	11	30		pluvia[		]pluvia	SO		1			3	3
1696	11	21	1696	12	1	suh		hor		SO			2	3	2	3
1696	11	22	1696	12	2	hor	nebulosy aer[		]nebulosy aer	SO			3		3
1696	11	23	1696	12	3	suh		hor		SO			2	3	2	3
1696	11	24	1696	12	4	hor				SO			3		3
1696	11	25	1696	12	5	hor				SO			3		3
1696	11	26	1696	12	6		pluvia[		]pluvia	SO		1			3	3
1696	11	27	1696	12	7	hor				SO mixed W			3		3
1696	11	28	1696	12	8		minuta pluvia[		]minuta pluvia	W S		1			2	2
1696	11	29	1696	12	9		minuta pluvia[		]minuta pluvia	SO		1			2	2
1696	11	30	1696	12	10	hor	minuta pluvia | nivea[		]minuta pluvia | nivea	NW		3	3		3	2
1696	12	1	1696	12	11		parum nivigit			NO		2			3
1696	12	2	1696	12	12	su			nivigit	W		2	1		1	3
1696	12	3	1696	12	13	hor				S SW			3		3
1696	12	4	1696	12	14	suq		diag	nivigit	W		2	2	3	2	3
1696	12	5	1696	12	15	suh		hor		O			2	3	2	3
1696	12	6	1696	12	16		nivigit[		]nivigit	NW		2			3	3
1696	12	7	1696	12	17		intensus frigy[		]intensus frigy	NO NW
1696	12	8	1696	12	18		nivigit[		]nivigit	W		2			3	3
1696	12	9	1696	12	19	suh			parum | nivis	W		2	2		2	3
1696	12	10	1696	12	20	suh			intensum | frigus	mixed			2		2
1696	12	11	1696	12	21	su			atrociss | frigus	mixed			1		1
1696	12	12	1696	12	22	su			atrociss | frigus	SO			1		1
1696	12	13	1696	12	23		nivigit		valide | remissum | frigus	S W		2			3
1696	12	14	1696	12	24	suq			temperat	O			2		2
1696	12	15	1696	12	25	hor			temperat | frigy	O			3		3
1696	12	16	1696	12	26	su			atrox | frigus	NW			2		2
1696	12	17	1696	12	27	su			intensum | frigy	mixed			1		1
1696	12	18	1696	12	28		nivigit tota die[		]nivigit tota die	S		1			3	3
1696	12	19	1696	12	29		remissum frigy[		]remissum frigy	SO
1696	12	20	1696	12	30	su			intensus | frigus	O			1		1
1696	12	21	1696	12	31	su			intensissimus | frigy	O			1		1
1696	12	22	1697	1	1	su			atrociss. | frigy	O			1		1
1696	12	23	1697	1	2	suh			intensum | frigus	O			2		2
1696	12	24	1697	1	3	suh			mediocre | frigy	O			2		2
1696	12	25	1697	1	4	su			mediocre | frigy	O			1		1
1696	12	26	1697	1	5	su		hor		O			1	3	1	3
1696	12	27	1697	1	6	hor			remissum | frigy	O			3		3
1696	12	28	1697	1	7	hor			remissum | frigy	O			3		3
1696	12	29	1697	1	8	hor			temperat	O			3		3
1696	12	30	1697	1	9	suh			temperat	O			2		2
1696	12	31	1697	1	10		parum | nivigit		temperat	O		2			3
1697	1	1	1697	1	11	su			intens | frigy	O			1		1
1697	1	2	1697	1	12	su			atrociss | frigus	mixed			1		1
1697	1	3	1697	1	13	su			atrociss | frigus	NO N			1		1
1697	1	4	1697	1	14	su		hor		NO			1	3	1	3
1697	1	5	1697	1	15	su			atrociss | frigus	O			1		1
1697	1	6	1697	1	16	su			intensum | frigy	mixed			1		1
1697	1	7	1697	1	17	su			intensum | frigus	O W			1		1
1697	1	8	1697	1	18	su		hor	nebula	O			1	3	1	3
1697	1	9	1697	1	19	su			remissum | frigy	O			1		1
1697	1	10	1697	1	20	hor			temperat	SO			3		3
1697	1	11	1697	1	21		nebula densa			N					3
1697	1	12	1697	1	22	suh		hor	ventosy | aer	O			2	3	2	3
1697	1	13	1697	1	23	hor			ventosy | aer	O			3		3
1697	1	14	1697	1	24	hor			temperat	O			3		3
1697	1	15	1697	1	25	su			frigy	O			1		1
1697	1	16	1697	1	26	su			intensus | frigy	O			1		1
1697	1	17	1697	1	27	su			atrociss | frigus	O			1		1
1697	1	18	1697	1	28			hor	remissum	mixed				3		3
1697	1	19	1697	1	29		nebulosus | aer[	hor	]nebulosus | aer	W				3	2	3
1697	1	20	1697	1	30		ventus com nive[		]ventus com nive	W		2			2	2
1697	1	21	1697	1	31	suh		hor		W			2	3	2	3
1697	1	22	1697	2	1	hor			impetuosy | ventus | cum nive	W			3		3
1697	1	23	1697	2	2	su			ventus | cum nive	SW		2	1		1
1697	1	24	1697	2	3	su			frigy intensus	NO			1		1
1697	1	25	1697	2	4	hor	frigidiss. venty[	su	]frigidiss. venty	O			3	1	3	1
1697	1	26	1697	2	5	hor	atrocib frigy[	suh	]atrociss frigy	O			3	2	3	2
1697	1	27	1697	2	6	suh			temperat | tranquill aer	O			2		2
1697	1	28	1697	2	7	hor			temperat	SO			3		3
1697	1	29	1697	2	8	hor			nivigit	SW		2	3		3	3
1697	1	30	1697	2	9		nivigit	hor		SO SW		2		3	3	3
1697	1	31	1697	2	10		nivigit, temperat[		]nivigit, temperat	SW		2			1	3
1697	2	1	1697	2	11	suh			temperat	O			2		2
1697	2	2	1697	2	12	hor			parum | nivigit	NO		2	3		3	3
1697	2	3	1697	2	13	hor			frigy	O N			3		3
1697	2	4	1697	2	14		parum | nivigit		temperat	NW		2			3
1697	2	5	1697	2	15	hor		su		SO			3	1	3	1
1697	2	6	1697	2	16	hor suh			frigus	O			2		2
1697	2	7	1697	2	17	su			temperat	S			1		1
1697	2	8	1697	2	18	hor			parum | nivigit	O W		2	3		3	3
1697	2	9	1697	2	19		nivigit	hor		S W		2		3	3	3
1697	2	10	1697	2	20	suh			frigus	NO			2		2
1697	2	11	1697	2	21		frigy	su		mixed				1		1
1697	2	12	1697	2	22		frigy | minimum	su		O				1		1
1697	2	13	1697	2	23		intensum frigy[	su	]intensum frigy	NO				1		1
1697	2	14	1697	2	24	su	intensum frigy[		]intensum frigy	O			1		1
1697	2	15	1697	2	25	su			frigy	SO W			1		1
1697	2	16	1697	2	26	su			intensum frigus	W mixed			1		1
1697	2	17	1697	2	27	su			intensum frigus	O			1		1
1697	2	18	1697	2	28	hor			temperat	SO			3		3
1697	2	19	1697	3	1	su			temperat	SO			1		1
1697	2	20	1697	3	2	su			temperat	SO			1		1
1697	2	21	1697	3	3	su			frigidiusante	NO			1		1
1697	2	22	1697	3	4	su	nebula		frigy	O			1		1
1697	2	23	1697	3	5	su	nebula		frigy	O			1		1
1697	2	24	1697	3	6	su		hor	nebula	S			1	3	1	3
1697	2	25	1697	3	7	su			temperat	mixed			1		1
1697	2	26	1697	3	8	su			temperat	mixed			1		1
1697	2	27	1697	3	9	su			temperat	S W			1		1
1697	2	28	1697	3	10	hor			pluvia	W		1	3		3	3
1697	3	1	1697	3	11		minuta | pluvia	hor		W		1		3	2	3
1697	3	2	1697	3	12	hor		suh		W			3	2	3	2
1697	3	3	1697	3	13	su			temperat	mixed			1		1
1697	3	4	1697	3	14	su			temperat	O S W			1		1
1697	3	5	1697	3	15	su		suh cl		W			1	2	1	2
1697	3	6	1697	3	16	hor			pluvia	SW		1	3		3	3
1697	3	7	1697	3	17	hor			ventus	NW			3		3
1697	3	8	1697	3	18		grando frigy[	suh	]grando frigy	NO				2		2
1697	3	9	1697	3	19	su			frigy	NO			1		1
1697	3	10	1697	3	20	su			temperat	O			1		1
1697	3	11	1697	3	21	suh		hor		mixed			2	3	2	3
1697	3	12	1697	3	22		pluvia	hor		N mixed		1		3	3	3
1697	3	13	1697	3	23	hor			minuta | pluvia	SO S		1	3		3	2
1697	3	14	1697	3	24	suh		hor		NO N			2	3	2	3
1697	3	15	1697	3	25		nix cum pluvia[		]nix cum pluvia	N NW		3			3	3
1697	3	16	1697	3	26		pluvia		impetuosy | ventus	NW		1			3
1697	3	17	1697	3	27		nix et | pluvia		ventus | impetuosy	NW		3			3
1697	3	18	1697	3	28	suh			frigus	NW SW			2		2
1697	3	19	1697	3	29	suh			frigus | nix	NW		2	2		2	3
1697	3	20	1697	3	30	suh			temperat	W			2		2
1697	3	21	1697	3	31	su		hor		O W			1	3	1	3
1697	3	22	1697	4	1		minuta | pluvis	hor		NW		1		3	2	3
1697	3	23	1697	4	2	suh		hor	pluvia	O SO		1	2	3	2	3
1697	3	24	1697	4	3		pluvia[		]pluvia	SO S		1			3	3
1697	3	25	1697	4	4		nix et | pluvia		frigy	N O		3			3
1697	3	26	1697	4	5	hor	frigy		ventus | validy	O			3		3
1697	3	27	1697	4	6		frigus	hor		O W				3		3
1697	3	28	1697	4	7	hor		suh		W			3	2	3	2
1697	3	29	1697	4	8	hor			minuta | pluvia	O		1	3		3	2
1697	3	30	1697	4	9		minuta | pluvia	hor		S O		1		3	2	3
1697	3	31	1697	4	10	hor			minuta | pluvia	O		1	3		3	2
1697	4	1	1697	4	11	su			venty | validy	O			1		1
1697	4	2	1697	4	12	su			frigy	O NO			1		1
1697	4	3	1697	4	13	su			frigy	NO			1		1
1697	4	4	1697	4	14	suh cl			frigid | venty	NO			2		2
1697	4	5	1697	4	15	su			temperat	O mixed			1		1
1697	4	6	1697	4	16	hor	[previous night: pluvia nocturna][		][previous night: pluvia nocturna] frigy	mixed N		1	3		3	3
1697	4	7	1697	4	17	hor suh			temperat | pluvia	mixed S		1	2		2	2
1697	4	8	1697	4	18	su			calidy | aer	O			1		1
1697	4	9	1697	4	19	suh cl			pluvia	O W		1	2		2	3
1697	4	10	1697	4	20		pluvia | larga	su	tempestas	O		1		1	3	1
1697	4	11	1697	4	21	suh cl			tempestas | imber	O		1	2		2	3
1697	4	12	1697	4	22	hor suq			pluvia	O W		1	2		2	3
1697	4	13	1697	4	23	hor		suh		W N			3	2	3	2
1697	4	14	1697	4	24	su			calor	O			1		1
1697	4	15	1697	4	25	su			calor	O SO			1		1
1697	4	16	1697	4	26	su			tempestas | tonitru	SO		1	1		1	2
1697	4	17	1697	4	27	su			pluvia	O		1	1		1	3
1697	4	18	1697	4	28	su			minuta | pluvia	NO		1	1		1	2
1697	4	19	1697	4	29	su			ventus | validy	O			1		1
1697	4	20	1697	4	30	su			frigy	O			1		1
1697	4	21	1697	5	1	su			frigy	O			1		1
1697	4	22	1697	5	2	su			frigy	O			1		1
1697	4	23	1697	5	3		pluvia	hor		O		1		3	3	3
1697	4	24	1697	5	4	hor		suq	pluvia	SO W		1	3	2	3	2
1697	4	25	1697	5	5	suh cl				O SO			2		2
1697	4	26	1697	5	6		pluvia | iris	suh cl		O S W		1		2	3	2
1697	4	27	1697	5	7		pluvia per | intervalla[		]pluvia per | intervalla	S W		1			2	2
1697	4	28	1697	5	8	su			calor	S			1		1
1697	4	29	1697	5	9	su			calor | nimiy	mixed			1		1
1697	4	30	1697	5	10	su			intensus | calor	mixed			1		1
1697	5	1	1697	5	11	su			calor	O			1		1
1697	5	2	1697	5	12	su			calor	O S W N O			1		1
1697	5	3	1697	5	13	su			calor	O			1		1
1697	5	4	1697	5	14	su		cl hor		O W			1	3	1	3
1697	5	5	1697	5	15	cl		suh		W			3	2	3	2
1697	5	6	1697	5	16	suh		cl		NO			2	3	2	3
1697	5	7	1697	5	17	suh cl				O			2		2
1697	5	8	1697	5	18	su			calor	O mixed			1		1
1697	5	9	1697	5	19	suh cl	[previous night: tempestas pluvia | nocturna][		][previous night: tempestas pluvia | nocturna] ventus validy	S W		1	2		2	3
1697	5	10	1697	5	20		pluvia	suh		S W		1		2	3	2
1697	5	11	1697	5	21		[previous night: imper] pluvia	suh	[previous night: imper] tempestas	SO W				2	2	2
1697	5	12	1697	5	22	suh			[previous night: pluvia nocturna]	SW		1	2		2	3
1697	5	13	1697	5	23	hor	[previous night: pluvia nocturna][	suh	][previous night: pluvia nocturna] minuta | pluvia	SW		1	3	2	3	2
1697	5	14	1697	5	24		aer frigidus | nimbus pluvia[		]aer frigidus | nimbus pluvia	W		1			3	3
1697	5	15	1697	5	25	suh hor			frigy	W			2		2
1697	5	16	1697	5	26	suh	coelum varium | pluvia grando | nix venty imperuosy[		]coelum varium | pluvia grando | nix venty imperuosy	W		1	2		2	2
1697	5	17	1697	5	27		pluvia per | intervalla[		]pluvia per | intervalla	W		1			2	2
1697	5	18	1697	5	28		continua pluvia[		]continua pluvia	W		1			3	3
1697	5	19	1697	5	29		pluvia	suh		W mixed		1		2	3	2
1697	5	20	1697	5	30	suh			frigy	MW			2		2
1697	5	21	1697	5	31	suh			frigus | minium	NW			2		2
1697	5	22	1697	6	1	suh			minuta | pluvia | frigy	N		1	2		2	2
1697	5	23	1697	6	2	suh			frigus | minium	NO			2		2
1697	5	24	1697	6	3	suh		hor	frigus	O			2	3	2	3
1697	5	25	1697	6	4	su			temperat	O			1		1
1697	5	26	1697	6	5	su			calor	O			1		1
1697	5	27	1697	6	6	suh			pluvia | temperatus	S W		1	2		2	3
1697	5	28	1697	6	7	suh				W NW			2		2
1697	5	29	1697	6	8	su				NO N			1		1
1697	5	30	1697	6	9	su				NW			1		1
1697	5	31	1697	6	10	su				O NO			1		1
1697	6	1	1697	6	11	su				O			1		1
1697	6	2	1697	6	12	su		hor	minuta | pluvia	S W		1	1	3	1	3
1697	6	3	1697	6	13	suh cl			imber	W S		1	2		2	3
1697	6	4	1697	6	14	suh			coelum | varium	W			2		2	2
1697	6	5	1697	6	15	cl		suh	pluvia	W N		1	3	2	3	2
1697	6	6	1697	6	16	cl	nebula	su		N			3	1	3	1
1697	6	7	1697	6	17	su			calor	O			1		1
1697	6	8	1697	6	18	su			aestus | tempestas | minuta | pluvia	O W			1		1	2
1697	6	9	1697	6	19		minuta | pluvia	cl		W N		1		3	2	3
1697	6	10	1697	6	20	su cl		hor		O			2	3	2	3
1697	6	11	1697	6	21	su			ventus | validy	O			1		1
1697	6	12	1697	6	22	su	[previous night: pluvia nocturna][		][previous night: pluvia nocturna] | aer fri | gidiusante	SW		1	1		1	3
1697	6	13	1697	6	23	suh cl			aer calid | frigine permixty | nimba pluvia	NW			2		2	2
1697	6	14	1697	6	24	suh		cl		NO			2	3	2	3
1697	6	15	1697	6	25	suh cl			imber	O W		1	2		2	3
1697	6	16	1697	6	26	cl			tempestas	W			3		3
1697	6	17	1697	6	27	hor			frigidiusanty | aer	W			3		3
1697	6	18	1697	6	28				aer | variy	NW
1697	6	19	1697	6	29	suh cl				NW			2		2
1697	6	20	1697	6	30	su cl				O NO			2		2
1697	6	21	1697	7	1	suh cl				NO			2		2
1697	6	22	1697	7	2	su				NO			1		1
1697	6	23	1697	7	3	su				O			1		1
1697	6	24	1697	7	4	suh			tempestas	O W			2		2
1697	6	25	1697	7	5	suh cl				O mixed			2		2
1697	6	26	1697	7	6				coelum | varium | minuta | pluvia	W						2
1697	6	27	1697	7	7				imber | tonitru	W		1				2
1697	6	28	1697	7	8				imber | tonitru	NO		1				2
1697	6	29	1697	7	9	suh			nebula | malutina | tonitru | imber	NO		1	2		2	2
1697	6	30	1697	7	10	suh			nebula | malutina | tonitru	NO		1	2		2	2
1697	7	1	1697	7	11	suh			guttae | pluviales | tonitru	O		1	2		2	2
1697	7	2	1697	7	12	suh		hor		W			2	3	2	3
1697	7	3	1697	7	13	suh			imber | nocturni | larga pluvia | per in | tervalla	S		1	2		2	3
1697	7	4	1697	7	14	suh cl				N			2		2
1697	7	5	1697	7	15	suh cl			coelus	mixed			2		2	2
1697	7	6	1697	7	16	suh cl		hor		NW			2	3	2	3
1697	7	7	1697	7	17		pluvia	suh		NW		1		2	3	2
1697	7	8	1697	7	18	su			temperatus | aer	S W			1		1
1697	7	9	1697	7	19		pluvia	hor		S W		1		3	3	3
1697	7	10	1697	7	20		pluvia	hor		S W		1		3	3	3
1697	7	11	1697	7	21	suh			pluvia	S NW		1	2		2	3
1697	7	12	1697	7	22	hor	pluvia[	hor	]pluvia	NW		1	3	3	3	3
1697	7	13	1697	7	23	hor		suh		NW			3	2	3	2
1697	7	14	1697	7	24	suh			calidy | aer	NW			2		2
1697	7	15	1697	7	25	suh			temperat	mixed NW			2		2
1697	7	16	1697	7	26	suh			pluvia | per inter | valla	NW		1	2		2	2
1697	7	17	1697	7	27	suh			nubus | hic illic | pluvia	NW		1	2		2	3
1697	7	18	1697	7	28	hor			pluvia | per inter | valla	NW		1	3		3	2
1697	7	19	1697	7	29	hor			pluvia | grando	NW		1	3		3	3
1697	7	20	1697	7	30		pluvia	suh		NW		1		2	3	2
1697	7	21	1697	7	31	suh			pluvia	W		1	2		2	3
1697	7	22	1697	8	1		larga pluvia[		]larga pluvia	mixed SW		1			3	3
1697	7	23	1697	8	2		minuta pluvia | larga[		]minuta pluvia | larga	S SO mixed NW		1			2	2
1697	7	24	1697	8	3		larga | pluvia	suh		W		1		2	3	2
1697	7	25	1697	8	4		pluvia | larga	hor	pluvia	NW		1		3	3	3
1697	7	26	1697	8	5	hor			pluvia	W		1	3		3	3
1697	7	27	1697	8	6		pluvia per | intervalla[		]pluvia per | intervalla	W NW N		1			2	2
1697	7	28	1697	8	7		pluvia			SO S W		1			3
1697	7	29	1697	8	8	hor			pluvia	SW W		1	3		3	3
1697	7	30	1697	8	9		pluvia	hor	pluvia	W NW		1		3	3	3
1697	7	31	1697	8	10	suh		cl		W			2	3	2	3
1697	8	1	1697	8	11	hor			pluvia | minuta	SW W		1	3		3	2
1697	8	2	1697	8	12		tempestas pluvia[		]tempestas pluvia	S SO W		1			3	3
1697	8	3	1697	8	13		minuta pluvia[		]minuta pluvia	SW		1			2	2
1697	8	4	1697	8	14		minuta pluvia	hor		SW		1		3	2	3
1697	8	5	1697	8	15	hor		hor		SW			3	3	3	3
1697	8	6	1697	8	16	su			calor	S			1		1
1697	8	7	1697	8	17	su			calor	SO O			1		1
1697	8	8	1697	8	18	suh		cl		SO S NW			2	3	2	3
1697	8	9	1697	8	19		pluvia	cl		NW S		1		3	3	3
1697	8	10	1697	8	20		minuta pluvia[		]minuta pluvia	NW		1			2	2
1697	8	11	1697	8	21		continua et | larga pluvia[		]continua et | larga pluvia	NW		1			3	3
1697	8	12	1697	8	22		pluvia per | intervalla[		]pluvia per | intervalla	W		1			2	2
1697	8	13	1697	8	23		pluvia per | intervalla[		]pluvia per | intervalla	NW		1			2	2
1697	8	14	1697	8	24	hor			continua | pluvia	mixed SW		1	3		3	3
1697	8	15	1697	8	25	suh		cl		SW			2	3	2	3
1697	8	16	1697	8	26	su			aestus	SW S			1		1
1697	8	17	1697	8	27	su			aestus	S			1		1
1697	8	18	1697	8	28		[previous night: tempestas nocturna] pluvia frigy[		[previous night: tempestas nocturna] ]pluvia frigy	W		1			3	3
1697	8	19	1697	8	29	su				NW mixed			1		1
1697	8	20	1697	8	30	su				O			1		1
1697	8	21	1697	8	31	su				O mixed			1		1
1697	8	22	1697	9	1	suh	[previous night: nocturna pluvia][		][previous night: nocturna pluvia] ventus	W		1	2		2	3
1697	8	23	1697	9	2	suh	[previous night: nocturna pluvia][		][previous night: nocturna pluvia]	W		1	2		2	3
1697	8	24	1697	9	3	suh				SW			2		2
1697	8	25	1697	9	4	su				S			1		1
1697	8	26	1697	9	5	su			aestus	S			1		1
1697	8	27	1697	9	6			suh		W				2		2
1697	8	28	1697	9	7	su				O			1		1
1697	8	29	1697	9	8	su				SW W N			1		1
1697	8	30	1697	9	9	su				NO			1		1
1697	8	31	1697	9	10	su			temperat	O			1		1
1697	9	1	1697	9	11	su				NO			1		1
1697	9	2	1697	9	12	su				O			1		1
1697	9	3	1697	9	13	su				mixed			1		1
1697	9	4	1697	9	14	suh cl		su		O			2	1	2	1
1697	9	5	1697	9	15	su				O			1		1
1697	9	6	1697	9	16	su				O			1		1
1697	9	7	1697	9	17	su				NO N NW			1		1
1697	9	8	1697	9	18	su				O NO			1		1
1697	9	9	1697	9	19	su	ventus validy[		frigy ]ventus validy	O			1		1
1697	9	10	1697	9	20	su		cl		SO			1	3	1	3
1697	9	11	1697	9	21		minuta | pluvia		tonitru | tempestas | larga | pluvia	S SO		1			2	2
1697	9	12	1697	9	22		[previous night: pluvia nocturna][ larga pluvia | tota die[		][previous night: pluvia nocturna] ]arga pluvia | tota die	W		1			3	3
1697	9	13	1697	9	23		nebula	hor		W				3	3	3
1697	9	14	1697	9	24	suh	[previous night: pluvia nocturna][		][previous night: pluvia nocturna]	SW		1	2		2	3
1697	9	15	1697	9	25		pluvia	hor		SW		1		3	3	3
1697	9	16	1697	9	26		pluvia | coelum varium[		]coelum varium	S		1			2	2
1697	9	17	1697	9	27		pluvia | coelum varium[		]coelum varium	SW NW		1			2	2
1697	9	18	1697	9	28		ventus		pluvia	SW		1				3
1697	9	19	1697	9	29		larga pluvia[		]larga pluvia	SW		1			3	3
1697	9	20	1697	9	30		pluvia[		]pluvia	SW		1			3	3
1697	9	21	1697	10	1		ventus impetu | osus pluvia[		]ventus impetu | osus pluvia	W		1			3	3
1697	9	22	1697	10	2		ventus cum | pluvia[		]ventus cum | pluvia	W		1			3	3
1697	9	23	1697	10	3	hor		hor		W			3	3	3	3
1697	9	24	1697	10	4		pluvia[		]pluvia	S		1			3	3
1697	9	25	1697	10	5	hor			frigus	mixed			3		3
1697	9	26	1697	10	6		pluvia[		]pluvia	SO S		1			3	3
1697	9	27	1697	10	7	hor	larga nocturna[		pluvia | ]larga nocturna	S O		1	3		3	3
1697	9	28	1697	10	8	hor		suh	pluvia	S		1	3	2	3	2
1697	9	29	1697	10	9	hor			pluvia	S W N		1	3		3	3
1697	9	30	1697	10	10		pluvia invalis[	hor	]pluvia invalis	NO		1		3	3	3
1697	10	1	1697	10	11		pluvia | nivea[		]pluvia | nivea	NO		3			3	3
1697	10	2	1697	10	12		pluvia larga | tota die[		]pluvia larga | tota die	mixed		1			3	3
1697	10	3	1697	10	13	hor			nimba | pluvia	W		1	3		3	3
1697	10	4	1697	10	14		nimba | pluvia[		]nimba | pluvia	S		1			3	3
1697	10	5	1697	10	15	suh		hor		S SO SW			2	3	2	3
1697	10	6	1697	10	16	hor			pluvia	S SW		1	3		3	3
1697	10	7	1697	10	17		pluvia[		]pluvia	SW		1			3	3
1697	10	8	1697	10	18	hor	impetuosus ventus[	suh	]impetuosus ventus	W			3	2	3	2
1697	10	9	1697	10	19	hor		hor		S SW			3	3	3	3
1697	10	10	1697	10	20		continua plu- | via tota die[		]continua plu- | via tota die	W		1			3
1697	10	11	1697	10	21		nebula	suh	nebula	mixed				2	3	2
1697	10	12	1697	10	22	suq		hor		mixed			2	3	2	3
1697	10	13	1697	10	23		pluvia larga | tota die[		]pluvia larga | tota die	NW		1			3	3
1697	10	14	1697	10	24		pluvia larga | tota die[		]pluvia larga | tota die	NW		1			3	3
1697	10	15	1697	10	25	hor		hor		NW			3	3	3	3
1697	10	16	1697	10	26	hor		hor		mixed			3	3	3	3
1697	10	17	1697	10	27	su				O			1		1
1697	10	18	1697	10	28	su		hor		NO			1	3	1	3
1697	10	19	1697	10	29	hor		hor		W			3	3	3	3
1697	10	20	1697	10	30	suh				NW			2		2
1697	10	21	1697	10	31	hor		hor		NW			3	3	3	3
1697	10	22	1697	11	1	hor		hor		NW			3	3	3	3
1697	10	23	1697	11	2	hor		su		mixed			3	1	3	1
1697	10	24	1697	11	3	su				mixed NW			1		1
1697	10	25	1697	11	4	suh		hor		S			2	3	2	3
1697	10	26	1697	11	5	su				S			1		1
1697	10	27	1697	11	6	hor			pluvia	SW		1	3		3	3
1697	10	28	1697	11	7	hor			pluvia	SW		1	3		3	3
1697	10	29	1697	11	8	hor	pluvia[		]pluvia	SW		1	3		3	3
1697	10	30	1697	11	9		pluvia		venty | impetuy	NW					3
1697	10	31	1697	11	10	[no row for that day in the table]
1697	11	1	1697	11	11	suh				NO			2		2
1697	11	2	1697	11	12	hor		hor		S			3	3	3	3
1697	11	3	1697	11	13		nebula | tota die[		]nebula | tota die	SW					3	3
1697	11	4	1697	11	14		nebula	hor		SW				3	3	3
1697	11	5	1697	11	15		nebula	suh		SO				2	3	2
1697	11	6	1697	11	16		nebula	hor		W				3	3	3
1697	11	7	1697	11	17		nebula	hor		mixed				3	3	3
1697	11	8	1697	11	18	hor		hor		O			3	3	3	3
1697	11	9	1697	11	19	hor		hor		O			3	3	3	3
1697	11	10	1697	11	20	hor		hor		NO			3	3	3	3
1697	11	11	1697	11	21	hor		hor		SW			3	3	3	3
1697	11	12	1697	11	22		nix	hor		SW		2		3	3	3
1697	11	13	1697	11	23	hor		hor		SW			3	3	3	3
1697	11	14	1697	11	24	suh		hor		mixed			2	3	2	3
1697	11	15	1697	11	25	hor		suh		W			3	2	3	2
1697	11	16	1697	11	26		nix		pluvia	NW		3			3	3
1697	11	17	1697	11	27		nix		frigus	NO		2			3
1697	11	18	1697	11	28	hor			nix	O		2	3		3	3
1697	11	19	1697	11	29	suh			nix	NO W		2	2		2	3
1697	11	20	1697	11	30	suh		hor		SO			2	3	2	3
1697	11	21	1697	12	1	hor		hor		SO			3	3	3	3
1697	11	22	1697	12	2	hor		hor		mixed SW			3	3	3	3
1697	11	23	1697	12	3	su		hor		SO S			1	3	1	3
1697	11	24	1697	12	4			hor		S SW				3		3
1697	11	25	1697	12	5	hor		hor		S			3	3	3	3
1697	11	26	1697	12	6	su		su		S SO			1	1	1	1
1697	11	27	1697	12	7	su			nix	S		2	1		1	3
1697	11	28	1697	12	8				nix	S		2				3
1697	11	29	1697	12	9		pluvia[		]pluvia	S		1			3	3
1697	11	30	1697	12	10	hor		hor		SW			3	3	3	3
1697	12	1	1697	12	11	hor		suh		W			3	2	3	2
1697	12	2	1697	12	12	hor			nix	W		2	3		3	2
1697	12	3	1697	12	13	suh			nix	NW		2	2		2	3
1697	12	4	1697	12	14	su				O			1		1
1697	12	5	1697	12	15	hor			nix	N		2	3		3	3
1697	12	6	1697	12	16		nix		frigy	N		2			3
1697	12	7	1697	12	17		intensum frigy[		]intensum frigy	W
1697	12	8	1697	12	18	su			frigy	W			1		1
1697	12	9	1697	12	19		nix		frigy	SW		2			3
1697	12	10	1697	12	20		nix	suh		W		2		2	3	2
1697	12	11	1697	12	21		nix		aspiosa	O		2			3
1697	12	12	1697	12	22	suh			pluvia	S		1	2		2	3
1697	12	13	1697	12	23	hor	calidy aër[		]calidy aër	W			3		3
1697	12	14	1697	12	24	hor	vupidy aër[		]vupidy aër	W			3		3
1697	12	15	1697	12	25	hor		hor		N O			3	3	3	3
1697	12	16	1697	12	26	su			frigy	O			1		1
1697	12	17	1697	12	27	suh		hor		O			2	3	2	3
1697	12	18	1697	12	28		aër | sunidy		temperat	SO					1
1697	12	19	1697	12	29		nebula	su	nebula	SO				1	3	1
1697	12	20	1697	12	30		nebula densa | tota die[		]nebula densa | tota die						3	3
1697	12	21	1697	12	31	hor	temperat[	hor	]temperat	O			3	3	3	3
1697	12	22	1698	1	1	su				O			1		1
1697	12	23	1698	1	2	su				SO			1		1
1697	12	24	1698	1	3	suh			temperat	SO			2		2
1697	12	25	1698	1	4	hor	aer calido | sunidy[	hor	]aer calido | sunidy	S SW			3	3	3	3
1697	12	26	1698	1	5	hor			pluvia	SW		1	3		3	3
1697	12	27	1698	1	6		nebula densa | pluvia larga[		]nebula densa | pluvia larga	SW W					3	3
1697	12	28	1698	1	7	hor		hor		SW			3	3	3	3
1697	12	29	1698	1	8		pluvia per | intervalla[		]pluvia per | intervalla	W		1			2	2
1697	12	30	1698	1	9	hor			nix	NW		2	3		3	3
1697	12	31	1698	1	10		nix per | intervalla[		]nix per | intervalla	O		2			2	2
1698	1	1	1698	1	11	hor		hor		O			3	3	3	3
1698	1	2	1698	1	12	hor		hor		SO			3	3	3	3
1698	1	3	1698	1	13	hor		hor		SO			3	3	3	3
1698	1	4	1698	1	14	hor		hor		SO			3	3	3	3
1698	1	5	1698	1	15	suh	aer impurus | et nebulosy[	hor	]aer impurus | et nebulosy	O			2	3	2	3
1698	1	6	1698	1	16		parum ninxit[		]parum ninxit	mixed		2			3	3
1698	1	7	1698	1	17	suh		hor		O			2	3	2	3
1698	1	8	1698	1	18	hor			acer | ventus	O			3		3
1698	1	9	1698	1	19	hor		hor		O			3	3	3	3
1698	1	10	1698	1	20	hor		hor		O			3	3	3	3
1698	1	11	1698	1	21	hor		hor		W			3	3	3	3
1698	1	12	1698	1	22	hor		hor		O			3	3	3	3
1698	1	13	1698	1	23	hor	parum ninxit[	hor	]parum ninxit	O		2	3	3	3	3
1698	1	14	1698	1	24	hor			nix	W		2	3		3	3
1698	1	15	1698	1	25	suh		hor		O			2	3	2	3
1698	1	16	1698	1	26	hor		hor		W O			3	3	3	3
1698	1	17	1698	1	27	hor		Hor		NO			3	3	3	3
1698	1	18	1698	1	28	hor	acer ventus[	hor	]acer ventus	W			3	3	3	3
1698	1	19	1698	1	29	hor	acer venty[	hor	]acer venty	O			3	3	3	3
1698	1	20	1698	1	30	hor	acer venty[	hor	]acer venty	O			3	3	3	3
1698	1	21	1698	1	31	suh			frigy	O			2		2
1698	1	22	1698	2	1	su hor			intensum | frigy	O SO			2		2
1698	1	23	1698	2	2	hor			frigidy | remissum	SO			3		3
1698	1	24	1698	2	3	hor		hor		SO			3	3	3	3
1698	1	25	1698	2	4	hor	nimba | pluvia[		]nimba | pluvia	S SO		1	3		3	3
1698	1	26	1698	2	5	suh		hor		S SO			2	3	2	3
1698	1	27	1698	2	6	suh		hor		S SO SW			2	3	2	3
1698	1	28	1698	2	7	hor	nimba pluvia[	suh	]nimba pluvia	S		1	3	2	3	2
1698	1	29	1698	2	8	hor	pluvia per inter- | valla[	hor	]pluvia per inter- | valla	S SW W		1	3	3	3	3
1698	1	30	1698	2	9		nix		ventus | impetuosy	NW		2			3
1698	1	31	1698	2	10	hor	nix per intervalla[	hor	]nix per intervalla	NW		2	3	3	3	3
1698	2	1	1698	2	11		nix caiosa| pluvia larga[		]nix capiosa | pluvia larga	S SW		3			3	3
1698	2	2	1698	2	12	hor		suh		W			3	2	3	2
1698	2	3	1698	2	13		pluvia per | intervalla[		]pluvia per | intervalla	S		1			2	2
1698	2	4	1698	2	14		pluvia per in- | tervalla[		]pluvia per in- | tervalla	S SO		1			2	2
1698	2	5	1698	2	15	hor		hor		O			3	3	3	3
1698	2	6	1698	2	16	su				O			1		1
1698	2	7	1698	2	17	su				O			1		1
1698	2	8	1698	2	18	su				O			1		1
1698	2	9	1698	2	19	su				O			1		1
1698	2	10	1698	2	20	su				O			1		1
1698	2	11	1698	2	21	su		cl		O N			1	3	1	3
1698	2	12	1698	2	22	suh		cl		NO			2	3	2	3
1698	2	13	1698	2	23	suh		cl	acer venty	O			2	3	2	3
1698	2	14	1698	2	24	hor			nix	NO		2	3		3	3
1698	2	15	1698	2	25	hor			nix	NO		2	3		3	3
1698	2	16	1698	2	26	hor		suh		O			3	2	3	2
1698	2	17	1698	2	27	suh		cl		O			2	3	2	3
1698	2	18	1698	2	28	suh		cl		mixed O			2	3	2	3
1698	2	19	1698	3	1	suh		cl		O			2	3	2	3
1698	2	20	1698	3	2	su			ventus | acerrimy	NO			1		1
1698	2	21	1698	3	3	su			acerrimy | ventus	NO			1		1
1698	2	22	1698	3	4	su			intensum frigus	O			1		1
1698	2	23	1698	3	5	su			frigus | intensum	O			1		1
1698	2	24	1698	3	6	su				O			1		1
1698	2	25	1698	3	7	su				O			1		1
1698	2	26	1698	3	8	su				O mixed			1		1
1698	2	27	1698	3	9	su				W			1		1
1698	2	28	1698	3	10	suh			minuta | pluvia	W S		1	2		2	2
1698	3	1	1698	3	11	suh	[previous night: nocturna pluvia][	cl	][previous night: nocturna pluvia]	mixed		1	2	3	2	3
1698	3	2	1698	3	12	suh		su		SO			2	1	2	1
1698	3	3	1698	3	13	hor		hor		W			3	3	3	3
1698	3	4	1698	3	14	su				O			1		1
1698	3	5	1698	3	15	su				O			1		1
1698	3	6	1698	3	16	su				NO			1		1
1698	3	7	1698	3	17	su			ventus | validy	NO			1		1
1698	3	8	1698	3	18	su				SO			1		1
1698	3	9	1698	3	19	suh		cl		NO			2	3	2	3
1698	3	10	1698	3	20		pluvia[		]pluvia	mixed SW		1			3	3
1698	3	11	1698	3	21	hor		hor		W			3	3	3	3
1698	3	12	1698	3	22		pluvia[		pluvia[	SW W		1			3	3
1698	3	13	1698	3	23		coelum varium | venty imp$[		]coelum varium | venty imp$	W					2	2
1698	3	14	1698	3	24		coelum varium[		]coelum varium	W					2	2
1698	3	15	1698	3	25	hor		hor		W			3	3	3	3
1698	3	16	1698	3	26	hor		hor		W			3	3	3	3
1698	3	17	1698	3	27	su				S			1		1
1698	3	18	1698	3	28		pluvia		coelum | varium	W		1			3	2
1698	3	19	1698	3	29		pluvia | ansina	suh		W		1		2	3	2
1698	3	20	1698	3	30	hor			nimba | pluvia	W		1	3		3	3
1698	3	21	1698	3	31	su				W S			1		1
1698	3	22	1698	4	1	su			calidus | acer	S			1		1
1698	3	23	1698	4	2	cl		hor		NW			3	3	3	3
1698	3	24	1698	4	3	su				O			1		1
1698	3	25	1698	4	4	su				O			1		1
1698	3	26	1698	4	5	su				O			1		1
1698	3	27	1698	4	6	su				O			1		1
1698	3	28	1698	4	7		nimba | pluvia	hor		SO		1		3	3	3
1698	3	29	1698	4	8		coelum varium[		]coelum varium	W					2	2
1698	3	30	1698	4	9		coelum varium[		]coelum varium	W					2	2
1698	3	31	1698	4	10		coelum varium[		]coelum varium	W					2	2
1698	4	1	1698	4	11		coelum varium[		]coelum varium	SW					2	2
1698	4	2	1698	4	12		pluvia per | intervalla[		]pluvia per | intervalla	W		1			2	2
1698	4	3	1698	4	13	hor			nimba | pluvia	NW NO O		1	3		3	3
1698	4	4	1698	4	14	suh				NO			2		2
1698	4	5	1698	4	15	suh		hor		NO			2	3	2	3
1698	4	6	1698	4	16	suh				O			2		2
1698	4	7	1698	4	17	suh			nimba | pluvia	O		1	2		2	3
1698	4	8	1698	4	18	su				O			1		1
1698	4	9	1698	4	19		pluvia[		]pluvia	NW		1			3	3
1698	4	10	1698	4	20	hor		hor		mixed			3	3	3	3
1698	4	11	1698	4	21	hor		hor		W			3	3	3	3
1698	4	12	1698	4	22	hor		hor		NW			3	3	3	3
1698	4	13	1698	4	23	suh				NW			2		2
1698	4	14	1698	4	24	suh			nimba | pluvia	NW		1	2		2	3
1698	4	15	1698	4	25		nimba | pluvia	hor		NW		1		3	3	3
1698	4	16	1698	4	26	suh				NO			2		2
1698	4	17	1698	4	27	suh				NO			2		2
1698	4	18	1698	4	28	suh				NO			2		2
1698	4	19	1698	4	29	hor		hor		NW			3	3	3	3
1698	4	20	1698	4	30	hor		suh		N NW			3	2	3	2
1698	4	21	1698	5	1	suh		hor		W			2	3	2	3
1698	4	22	1698	5	2	suh			nimba | pluvia	SO S SW NW		1	2		2	3
1698	4	23	1698	5	3		pluvia		nix	N NW		1			3	3
1698	4	24	1698	5	4	hor		suh		NW			3	2	3	2
1698	4	25	1698	5	5	suh			pluvia	O NW		1	2		2	3
1698	4	26	1698	5	6		pluvia per | intervalla[		]pluvia per | intervalla	NW		1			2	2
1698	4	27	1698	5	7		pluvia grando[		]pluvia grando | nix	NW		1			3	3
1698	4	28	1698	5	8		grando | pluvia	hor		SW		1		3	3	3
1698	4	29	1698	5	9	suh		suh	pluvia	NW		1	2	2	2	2
1698	4	30	1698	5	10		nimba pluvia | per intervalla[		]nimba pluvia | per intervalla | frigy	NW		1			2	2
1698	5	1	1698	5	11		pluvia per | intervalla | frigus minima[		pluvia per | intervalla | frigus minima[	N		1			2	2
1698	5	2	1698	5	12	suh			frigy	NW			2		2
1698	5	3	1698	5	13	hor		hor		NW			3	3	3	3
1698	5	4	1698	5	14	hor	pluvia nocturnus[		]pluvia nocturnus | frigus minima	NW		1	3		3	3
1698	5	5	1698	5	15		pluvia nocturna | pluvia tota die[		]pluvia nocturna | pluvia tota die	N		1			3	3
1698	5	6	1698	5	16	suh				W			2		2
1698	5	7	1698	5	17	suh cl				O			2		2
1698	5	8	1698	5	18		pluvia	suh	pluvia	O W		1		2	3	2
1698	5	9	1698	5	19		pluvia			NW		1			3
1698	5	10	1698	5	20		pluvia			W		1			3
1698	5	11	1698	5	21		pluvia			NW		1			3
1698	5	12	1698	5	22	suh			pluvia per intervalla	W		1	2		2	2
1698	5	13	1698	5	23		pluvia per | intervalla[		]pluvia per | intervalla	S SW		1			2	2
1698	5	14	1698	5	24		pluvia	suh		W NO		1		2	3	2
1698	5	15	1698	5	25		pluvia tota | die[		]pluvia tota | die	O		1			3	3
1698	5	16	1698	5	26	suh				SO S SW			2		2
1698	5	17	1698	5	27	hor			nimba | pluvia	NW		1	3		3	3
1698	5	18	1698	5	28		nimba | pluvia	suh		NO		1		2	3	2
1698	5	19	1698	5	29	su			nimba | pluvia	O		1	1		1	3
1698	5	20	1698	5	30		pluvia	suh	calor	mixed				2	3	2
1698	5	21	1698	5	31	suh				O NW			2		2
1698	5	22	1698	6	1	su				W			1		1
1698	5	23	1698	6	2	su				SO			1		1
1698	5	24	1698	6	3	su			tonitru | pluvia | nimba	S		1	1		1	2
1698	5	25	1698	6	4	su		hor		NW			1	3	1	3
1698	5	26	1698	6	5	suh				O S W NO			2		2
1698	5	27	1698	6	6	su				O W			1		1
1698	5	28	1698	6	7	su			tempestas	O W			1		1
1698	5	29	1698	6	8	suh				NO			2		2
1698	5	30	1698	6	9	suh				NW NO			2		2
1698	5	31	1698	6	10	suh			pluvia	O NW		1	2		2	3
1698	6	1	1698	6	11	su				NW			1		1
1698	6	2	1698	6	12	suh			minuta | pluvia	NO		1	2		2	2
1698	6	3	1698	6	13		pluvia			N		1			3
1698	6	4	1698	6	14		[previous night: pluvia noctuerna][ pluvia tota die[		][previous night: pluvia noctuerna] ]pluvia tota die	N NW		1			3	3
1698	6	5	1698	6	15		[previous night: pluvia noctuerna][ pluvia tota die[		][previous night: pluvia noctuerna] ]pluvia tota die	NW		1			3	3
1698	6	6	1698	6	16	hor		suh		NW			3	2	3	2
1698	6	7	1698	6	17		minuta | pluvia	hor		mixed		1		3	2	3
1698	6	8	1698	6	18	suh				NO			2		2
1698	6	9	1698	6	19	su				NO			1		1
1698	6	10	1698	6	20	su			temperat	NO			1		1
1698	6	11	1698	6	21	su				SO			1		1
1698	6	12	1698	6	22	suh	[previous night: pluvia noctuerna]		][previous night: pluvia noctuerna] pluvia	S SW		1	2		2	3
1698	6	13	1698	6	23	su		suh	minuta | pluvia | tonitru	S W		1	1	2	1	2
1698	6	14	1698	6	24	hor		hor		W			3	3	3	3
1698	6	15	1698	6	25	diag hor		suh		W		1	3	2	3	2
1698	6	16	1698	6	26	hor		hor		W			3	3	3	3
1698	6	17	1698	6	27	suh				W N			2		2
1698	6	18	1698	6	28	su				N			1		1
1698	6	19	1698	6	29	su				N			1		1
1698	6	20	1698	6	30	su				NO			1		1
1698	6	21	1698	7	1	su				NW N			1		1
1698	6	22	1698	7	2	su				O S W N			1		1
1698	6	23	1698	7	3	su				O S N			1		1
1698	6	24	1698	7	4	su		cl	tonitru	O S W N		1	1	3	1	3
1698	6	25	1698	7	5	suh		cl		SO W			2	3	2	3
1698	6	26	1698	7	6	hor			pluvia	W		1	3		3	3
1698	6	27	1698	7	7	hor			pluvia	W		1	3		3	3
1698	6	28	1698	7	8		pluvia per | intervalla[		]pluvia per | intervalla	W		1			2	2
1698	6	29	1698	7	9	hor		hor		SW			3	3	3	3
1698	6	30	1698	7	10	hor		hor		SW			3	3	3	3
1698	7	1	1698	7	11	suh		hor		W			2	3	2	3
1698	7	2	1698	7	12	suh		hor		W			2	3	2	3
1698	7	3	1698	7	13		pluvia larga | per intervalla[		]pluvia larga | per intervalla	O		1			2	2
1698	7	4	1698	7	14	hor			pluvia	NW		1	3		3	3
1698	7	5	1698	7	15	hor			pluvia	SW		1	3		3	3
1698	7	6	1698	7	16		pluvia	suh		SW		1		2	3	2
1698	7	7	1698	7	17		pluvia | per inter | valla	suh		W		1		2	2	2
1698	7	8	1698	7	18	su			pluvia | temperatus	mixed		1	1		1	3
1698	7	9	1698	7	19		nebula	hor		mixed				3	3	3
1698	7	10	1698	7	20	suh		hor		W			2	3	2	3
1698	7	11	1698	7	21		pluvia	suh		mixed		1		2	3	2
1698	7	12	1698	7	22	hor			pluvia larga	mixed		1	3		3	3
1698	7	13	1698	7	23		pluvia[		]pluvia	W		1			3	3
1698	7	14	1698	7	24		pluvia larga | continua | tota die[		]pluvia larga | continua | tota die	W		1			3	3
1698	7	15	1698	7	25	suh		su		mixed			2	1	2	1
1698	7	16	1698	7	26	suh		hor		W			2	3	2	3
1698	7	17	1698	7	27		pluvia continua | tota die[		]pluvia continua | tota die	N NO		1			3	3
1698	7	18	1698	7	28	suh	nebula	hor		W			2	3	2	3
1698	7	19	1698	7	29		minuta | pluvia	suh		W		1		2	2	2
1698	7	20	1698	7	30	su		su hor		W			1	2	1	2
1698	7	21	1698	7	31	suh	[previous night: pluvia nocturna][ ventus validy[	su	][previous night: pluvia nocturna] ]ventus validy	NW		1	2	1	2	1
1698	7	22	1698	8	1	suh				mixed			2		2
1698	7	23	1698	8	2	su				mixed			1		1
1698	7	24	1698	8	3	suh cl		su		O			2	1	2	1
1698	7	25	1698	8	4	su		su	fulgur	O S W			1	1	1	1
1698	7	26	1698	8	5		pluvia per | intervalla[		]pluvia per | intervalla	W		1			2	2
1698	7	27	1698	8	6		pluvia		imber	W		1			3	3
1698	7	28	1698	8	7	suh cl				NW			2		2
1698	7	29	1698	8	8	suh cl				mixed NW			2		2
1698	7	30	1698	8	9	suh cl				NW			2		2
1698	7	31	1698	8	10	suh			minuta | pluvia	NW		1	2		2	2
1698	8	1	1698	8	11		minuta | pluvia[		]minuta | pluvia	NW		1			2	2
1698	8	2	1698	8	12		larga pluvia | per intervalla[		]larga pluvia | per intervalla	mixed NW		1			2	2
1698	8	3	1698	8	13		continua | pluvia tota | die[		]continua | pluvia tota | die	NW		1			3	3
1698	8	4	1698	8	14		pluvia tota | die[		]pluvia tota | die	NW		1			3	3
1698	8	5	1698	8	15	hor			imber	NW		1	3		3	3
1698	8	6	1698	8	16	hor			pluvia	NW		1	3		3	3
1698	8	7	1698	8	17		pluvia	suh		W		1		2	3	2
1698	8	8	1698	8	18	suh		suh		W			2	2	2	2
1698	8	9	1698	8	19	suh			pluvia	W		1	2		2	3
1698	8	10	1698	8	20		pluvia[		]pluvia	NW		1			3	3
1698	8	11	1698	8	21	suh			pluvia	W		1	2		2	3
1698	8	12	1698	8	22	suh				NW			2		2
1698	8	13	1698	8	23	suh			pluvia	NW		1	2		2	3
1698	8	14	1698	8	24	suh		su		NW			2	1	2	1
1698	8	15	1698	8	25	su		hor		O			1	3	1	3
1698	8	16	1698	8	26	suh cl		su		N			2	1	2	1
1698	8	17	1698	8	27	suh		cl		NW			2	3	2	3
1698	8	18	1698	8	28	suh		suh cl		NO			2	2	2	2
1698	8	19	1698	8	29	suh		suh		O S			2	2	2	2
1698	8	20	1698	8	30	su				O S SO			1		1
1698	8	21	1698	8	31	su				O mixed			1		1
1698	8	22	1698	9	1	su			aestus	SO S			1		1
1698	8	23	1698	9	2	su			aestus	S			1		1
1698	8	24	1698	9	3	su			aestus	O S			1		1
1698	8	25	1698	9	4	su			aestus | tempestus | nubes	SO S SW			1		1	2
1698	8	26	1698	9	5	suh			tempestas	SO S		1	2		2
1698	8	27	1698	9	6		minuta | pluvia	hor		SW		1		3	2	3
1698	8	28	1698	9	7		imber | matutiny	suh		SW		1		2	2	2
1698	8	29	1698	9	8	suh		hor		W			2	3	2	3
1698	8	30	1698	9	9	suh		hor		SW			2	3	2	3
1698	8	31	1698	9	10		pluvia[		]pluvia	W		1			3	3
1698	9	1	1698	9	11	suh		suh		SO			2	2	2	2
1698	9	2	1698	9	12		pluvia continua | tota die[		]pluvia continua | tota die	mixed		1			3	3
1698	9	3	1698	9	13		pluvia	hor		W		1		3	3	3
1698	9	4	1698	9	14		pluvia	suh hor		S W		1		2	3	2
1698	9	5	1698	9	15		pluvia		imber | tonitru	SW		1			3	2
1698	9	6	1698	9	16	suh		suh		SW			2	2	2	2
1698	9	7	1698	9	17	suh		suh		SW			2	2	2	2
1698	9	8	1698	9	18	su		su		SO			1	1	1	1
1698	9	9	1698	9	19	su		su		SO			1	1	1	1
1698	9	10	1698	9	20	su		hor		SO mixed			1	3	1	3
1698	9	11	1698	9	21		pluvia | continua	hor		NW		1		3	3	3
1698	9	12	1698	9	22		nebula		pluvia	mixed NO					3	3
1698	9	13	1698	9	23		pluvia		pluvia	O		1			3	3
1698	9	14	1698	9	24	su		su		O			1	1	1	1
1698	9	15	1698	9	25	su		su		O			1	1	1	1
1698	9	16	1698	9	26	hor		hor		O			3	3	3	3
1698	9	17	1698	9	27		pluvia continua | tota die[		]pluvia continua | tota die	mixed		1			3	3
1698	9	18	1698	9	28	suh		suh hor		N			2	2	2	2
1698	9	19	1698	9	29	suh		suh	tempestas | sub initium | nocti	SO			2	2	2	2
1698	9	20	1698	9	30		pluvia		pluvia	mixed		1			3	3
1698	9	21	1698	10	1		pluvia		pluvia	mixed		1			3	3
1698	9	22	1698	10	2		pluvia		pluvia	mixed W		1			3	3
1698	9	23	1698	10	3		pluvia	hor		mixed		1		3	3	3
1698	9	24	1698	10	4	hor		hor		W			3	3	3	3
1698	9	25	1698	10	5	suh		suh		SO			2	2	2	2
1698	9	26	1698	10	6	su		su		SO			1	1	1	1
1698	9	27	1698	10	7	su		su		SO			1	1	1	1
1698	9	28	1698	10	8	su		su		SO O			1	1	1	1
1698	9	29	1698	10	9	hor		su		O			3	1	3	1
1698	9	30	1698	10	10	su		suh hor		W			1	2	1	2
1698	10	1	1698	10	11	su		su		O			1	1	1	1
1698	10	2	1698	10	12	su		su		O			1	1	1	1
1698	10	3	1698	10	13	su		su		mixed			1	1	1	1
1698	10	4	1698	10	14	su		su		W			1	1	1	1
1698	10	5	1698	10	15		Nubes		Nubes	W					3	3
1698	10	6	1698	10	16	hor		hor		W			3	3	3	3
1698	10	7	1698	10	17		pluvia		Nubes	W		1			3	3
1698	10	8	1698	10	18		pluvia	hor		W		1		3	3	3
1698	10	9	1698	10	19		pluvia	suh		mixed		1		2	3	2
1698	10	10	1698	10	20		pluvia	hor		W		1		3	3	3
1698	10	11	1698	10	21		pluvia			W		1			3
1698	10	12	1698	10	22		pluvia			W		1			3
1698	10	13	1698	10	23		pluvia			S SO		1			3
1698	10	14	1698	10	24	suh		suh		W			2	2	2	2
1698	10	15	1698	10	25	suh		hor		W mixed			2	3	2	3
1698	10	16	1698	10	26		pluvia	hor		O		1		3	3	3
1698	10	17	1698	10	27	hor		hor	pluvia	O		1	3	3	3	3
1698	10	18	1698	10	28	hor		suh		SO			3	2	3	2
1698	10	19	1698	10	29	suh		suh cl		S			2	2	2	2
1698	10	20	1698	10	30	suh		hor		SW			2	3	2	3
1698	10	21	1698	10	31	suh		su hor		SO W			2	2	2	2
1698	10	22	1698	11	1	suh		su		SW			2	1	2	1
1698	10	23	1698	11	2	su		su		SO			1	1	1	1
1698	10	24	1698	11	3		nebula	hor		O				3	3	3
1698	10	25	1698	11	4	suh		suh		O			2	2	2	2
1698	10	26	1698	11	5	su		su		O			1	1	1	1
1698	10	27	1698	11	6	suh	nebula	su		SO			2	1	2	1
1698	10	28	1698	11	7	suh		hor	pluvia	S SW		1	2	3	2	3
1698	10	29	1698	11	8	hor		hor		SW mixed			3	3	3	3
1698	10	30	1698	11	9	hor			pluvia	SO W		1	3		3	3
1698	10	31	1698	11	10		nix	suh	nix | frigus	NW N		2		2	3	2
1698	11	1	1698	11	11	su		su		mixed			1	1	1	1
1698	11	2	1698	11	12	su		su		O			1	1	1	1
1698	11	3	1698	11	13	suh cl		su		O			2	1	2	1
1698	11	4	1698	11	14	hor		hor		mixed			3	3	3	3
1698	11	5	1698	11	15	suh		hor		SO			2	3	2	3
1698	11	6	1698	11	16		pluvia[		]pluvia	S		1			3	3
1698	11	7	1698	11	17	suh		hor		S SW			2	3	2	3
1698	11	8	1698	11	18	hor		hor		SW			3	3	3	3
1698	11	9	1698	11	19	suh	ventis | vehemens		tonitru | fulgur | grando	SW		1	2		2	2
1698	11	10	1698	11	20		nix pluvia | tota die[		]nix pluvia | tota die	W		3			3	3
1698	11	11	1698	11	21	suh		su		SW			2	1	2	1
1698	11	12	1698	11	22	su		suh		SW			1	2	1	2
1698	11	13	1698	11	23					W
1698	11	14	1698	11	24		nix	hor		NW				3	3	3
1698	11	15	1698	11	25	suh		suh		NW mixed			2	2	2	2
1698	11	16	1698	11	26	su		suh cl		NO			1	2	1	2
1698	11	17	1698	11	27	su		su		O			1	1	1	1
1698	11	18	1698	11	28	su		su	intensum frigus[	O SO	]intensum frigus		1	1	1	1
1698	11	19	1698	11	29	hor	remissum frigy[	hor	]remissum frigy	SO			3	3	3	3
1698	11	20	1698	11	30	hor			pluvia	S		1	3		3	3
1698	11	21	1698	12	1	hor			pluvia	SW W		1	3		3	3
1698	11	22	1698	12	2	hor		hor		W			3	3	3	3
1698	11	23	1698	12	3		nix		pluvia	SW		3			3	3
1698	11	24	1698	12	4		pluvia continua | tota die[		]pluvia continua | tota die	SW		1			3	3
1698	11	25	1698	12	5	hor			pluvia	SW		1	3		3	3
1698	11	26	1698	12	6	suh cl		su		W			2	1	2	1
1698	11	27	1698	12	7	hor		suh		SW			3	2	3	2
1698	11	28	1698	12	8	suh		hor		W			2	3	2	3
1698	11	29	1698	12	9	su	[previous night: nix nocturna][	su hor	][previous night: nix nocturna]	SO		2	1	2	1	2
1698	11	30	1698	12	10	hor		hor		O			3	3	3	3
1698	12	1	1698	12	11	hor		hor		O			3	3	3	3
1698	12	2	1698	12	12	hor			nix	NO		2	3		3	3
1698	12	3	1698	12	13	hor		hor		O			3	3	3	3
1698	12	4	1698	12	14	suh		su		mixed NW			2	1	2	1
1698	12	5	1698	12	15	suh		hor		mixed			2	3	2	3
1698	12	6	1698	12	16	hor		hor		SO			3	3	3	3
1698	12	7	1698	12	17	hor		hor		S			3	3	3	3
1698	12	8	1698	12	18	su		su		O			1	1	1	1
1698	12	9	1698	12	19	hor		hor		mixed			3	3	3	3
1698	12	10	1698	12	20	su		su		S			1	1	1	1
1698	12	11	1698	12	21	suh		su		SW			2	1	2	1
1698	12	12	1698	12	22		nix		venty | impetuosy	W		2			3
1698	12	13	1698	12	23	suh		suh		W			2	2	2	2
1698	12	14	1698	12	24	su		su		SO			1	1	1	1
1698	12	15	1698	12	25	hor			minuta | pluvia	S		1	3		3	2
1698	12	16	1698	12	26	hor	pluvia nocturna[	hor	]pluvia nocturna	S		1	3	3	3	3
1698	12	17	1698	12	27	suh		hor		S			2	3	2	3
1698	12	18	1698	12	28	hor		hor		S			3	3	3	3
1698	12	19	1698	12	29	suh		suh		W			2	2	2	2
1698	12	20	1698	12	30		pluvia	hor		SO S		1		3	3	3
1698	12	21	1698	12	31		[previous night: pluvia nocturna][ pluvia | venty impetuosy[		][previous night: pluvia nocturna] ]pluvia | venty impetuosy	W		1			3	3
1698	12	22	1699	1	1		pluvia | nimis imp$ | tempestas[		]pluvia | nimis imp$ | tempestas	NW		1			3	3
1698	12	23	1699	1	2	hor		hor		W			3	3	3	3
1698	12	24	1699	1	3	hor			venty | impetuos	NW			3		3
1698	12	25	1699	1	4	suh	venty | validy	hor		NW			2	3	2	3
1698	12	26	1699	1	5		pluvia | minuta	hor		W		1		3	2	3
1698	12	27	1699	1	6	suh		suh hor		W			2	2	2	2
1698	12	28	1699	1	7		nix	hor		W		2		3	3	3
1698	12	29	1699	1	8	hor		hor		W			3	3	3	3
1698	12	30	1699	1	9		[previous night: pluvia nocturna][ pluvia | ventus validy[	hor	][previous night: pluvia nocturna] ]ventus validy	W		1		3	3	3
1698	12	31	1699	1	10		coelum | varium		nix	W					2	3
1699	1	1	1699	1	11	su		su		W			1	1	1	1
1699	1	2	1699	1	12	hor		hor	minuta | pluvia	S SO		1	3	3	3	3
1699	1	3	1699	1	13		pluvia conti | nua[		]pluvia conti | nua	S		1			3	3
1699	1	4	1699	1	14	hor	larga pluvia[	hor	]larga pluvia	SO		1	3	3	3	3
1699	1	5	1699	1	15	hor		suh		W			3	2	3	2
1699	1	6	1699	1	16	hor		hor		SO			3	3	3	3
1699	1	7	1699	1	17	hor		hor		S			3	3	3	3
1699	1	8	1699	1	18	suh		hor		W			2	3	2	3
1699	1	9	1699	1	19	hor		hor		SW W			3	3	3	3
1699	1	10	1699	1	20	hor		suh		W NW			3	2	3	2
1699	1	11	1699	1	21	hor			nix	SO		2	3		3	3
1699	1	12	1699	1	22	hor			pluvia	W		1	3		3	3
1699	1	13	1699	1	23		[previous night: pluvia nocturna][ pluvia[		][previous night: pluvia nocturna] ]pluvia	SW		1			3	3
1699	1	14	1699	1	24	hor			pluvia	W mixed			3		3	3
1699	1	15	1699	1	25	hor		hor		O			3	3	3	3
1699	1	16	1699	1	26	hor		hor		N			3	3	3	3
1699	1	17	1699	1	27	hor		hor		O N			3	3	3	3
1699	1	18	1699	1	28	su		su		O			1	1	1	1
1699	1	19	1699	1	29		nebula	su		mixed O				1	3	1
1699	1	20	1699	1	30	su		su		O			1	1	1	1
1699	1	21	1699	1	31	su		su		O			1	1	1	1
1699	1	22	1699	2	1	su		su		O			1	1	1	1
1699	1	23	1699	2	2	su	ventus validy[	su	]ventus validy	O			1	1	1	1
1699	1	24	1699	2	3	su		su		O			1	1	1	1
1699	1	25	1699	2	4	su		su		O			1	1	1	1
1699	1	26	1699	2	5	su		su		O			1	1	1	1
1699	1	27	1699	2	6	su		su		O			1	1	1	1
1699	1	28	1699	2	7	su		su		O			1	1	1	1
1699	1	29	1699	2	8	hor		hor	nebulasy aer	mixed			3	3	3	3
1699	1	30	1699	2	9	suh		hor		SO S SW			2	3	2	3
1699	1	31	1699	2	10		pluvia[		]pluvia	S		1			3	3
1699	2	1	1699	2	11		nebula | densa[		]nebula | densa	mixed					3	3
1699	2	2	1699	2	12	su		su		O			1	1	1	1
1699	2	3	1699	2	13	su		su		O			1	1	1	1
1699	2	4	1699	2	14		[previous night: nix nocturna][ nix		][previous night: nix nocturna]	mixed S		2			3	3
1699	2	5	1699	2	15	hor			nix	SW S		2	3		3	3
1699	2	6	1699	2	16		ventus impetuosy | nix[		]ventus impetuosy | nix	NW		2			3	3
1699	2	7	1699	2	17		nix		nix	SW S SO		2			3	3
1699	2	8	1699	2	18	hor		suh		NW			3	2	3	2
1699	2	9	1699	2	19	suh		hor		S			2	3	2	3
1699	2	10	1699	2	20	suh	[previous night: nix nocturna][		][previous night: nix nocturna] nebula	W		2	2		2	3
1699	2	11	1699	2	21	hor		hor		W			3	3	3	3
1699	2	12	1699	2	22		minuta pluvia[		]minuta pluvia	W		1			2	2
1699	2	13	1699	2	23		pluvia[		]pluvia	W		1			3	3
1699	2	14	1699	2	24		nix per intervalla | venty impetousy[		]nix per intervalla | venty impetousy	NW		2			2	2
1699	2	15	1699	2	25	suh	nix	su		NW		2	2	1	2	1
1699	2	16	1699	2	26	suh		hor		O			2	3	2	3
1699	2	17	1699	2	27	hor		suh		O			3	2	3	2
1699	2	18	1699	2	28		nix et pluvia[		]nix et pluvia	SO S SW		3			3	3
1699	2	19	1699	3	1	hor			pluvia	SW		1	3		3	3
1699	2	20	1699	3	2		nix et pluvia[		]nix et pluvia	W		3			3	3
1699	2	21	1699	3	3		nix et pluvia[		]nix et pluvia	W		3			3	3
1699	2	22	1699	3	4		nix			W		2			3
1699	2	23	1699	3	5		nix	suh		NW		2		2	3	2
1699	2	24	1699	3	6	suh	nix	su		NW NO		2	2	1	2	1
1699	2	25	1699	3	7		nix	suh		NW		2		2	3	2
1699	2	26	1699	3	8		nix	hor		SW		2		3	3	3
1699	2	27	1699	3	9		nix		nix	SW		2			3	3
1699	2	28	1699	3	10	hor		hor		SW			3	3	3	3
1699	3	1	1699	3	11		nix et pluvia[		]nix et pluvia	S SW		3			3	3
1699	3	2	1699	3	12	hor		hor		O NO			3	3	3	3
1699	3	3	1699	3	13	hor		hor		NO			3	3	3	3
1699	3	4	1699	3	14	hor			nix copiosa	NW		2	3		3	3
1699	3	5	1699	3	15	hor			nix	N		2	3		3	3
1699	3	6	1699	3	16	suh			nix	N		2	2		2	3
1699	3	7	1699	3	17	hor			nix	NW		2	3		3	3
1699	3	8	1699	3	18	hor			nix	NO		2	3		3	3
1699	3	9	1699	3	19	hor			nix	NO		2	3		3	3
1699	3	10	1699	3	20	suh		su		NO			2	1	2	1
1699	3	11	1699	3	21	su		su		O			1	1	1	1
1699	3	12	1699	3	22	su		su		O			1	1	1	1
1699	3	13	1699	3	23	su		su		NO mixed			1	1	1	1
1699	3	14	1699	3	24	su			nix	SW		2	1		1	3
1699	3	15	1699	3	25	suh		hor	minuta | pluvia	W		1	2	3	2	3
1699	3	16	1699	3	26		minuta | pluvia		nebula	W		1			2	3
1699	3	17	1699	3	27	hor		hor		SO			3	3	3	3
1699	3	18	1699	3	28	hor			nix	NO		2	3		3	3
1699	3	19	1699	3	29	hor		hor		NW			3	3	3	3
1699	3	20	1699	3	30	hor		suh		SO S			3	2	3	2
1699	3	21	1699	3	31	hor		hor		SW			3	3	3	3
1699	3	22	1699	4	1		pluvia | nebulosa	suh		W NW		1		2	3	2
1699	3	23	1699	4	2		nebula	suh		mixed				2	3	2
1699	3	24	1699	4	3	suh		suh		SO			2	2	2	2
1699	3	25	1699	4	4	suh		hor		SO			2	3	2	3
1699	3	26	1699	4	5		pluvia | nebulosa	hor		NW		1		3	3	3
1699	3	27	1699	4	6	hor		hor		mixed			3	3	3	3
1699	3	28	1699	4	7	suh			pluvia	O S SW		1	2		2	3
1699	3	29	1699	4	8	hor		suh		SO			3	2	3	2
1699	3	30	1699	4	9	hor			pluvia	S		1	3		3	3
1699	3	31	1699	4	10		nix et pluvia[		]nix et pluvia	W		3			3	3
1699	4	1	1699	4	11		nix et pluvia[		]nix et pluvia			3			3	3
1699	4	2	1699	4	12		continua pluvia | tota die[ nix	hor	]continua pluvia | tota die	NW		1		3	3	3
1699	4	3	1699	4	13		continua minuta | pluvia tota die[		]continua minuta | pluvia tota die			1			2	2
1699	4	4	1699	4	14	hor		hor		NO			3	3	3	3
1699	4	5	1699	4	15		nix et pluvia | minuta tota die[		]nix et pluvia | minuta tota die	NO		3			2	2
1699	4	6	1699	4	16	hor		suh		SW NO			3	2	3	2
1699	4	7	1699	4	17	suh		hor		O			2	3	2	3
1699	4	8	1699	4	18	hor	minuta pluvia[	suh	]minuta pluvia	S SW		1	3	2	3	2
1699	4	9	1699	4	19	suh		suh		O			2	2	2	2
1699	4	10	1699	4	20	suh	ventus validy[	suh	]ventus validy	O NO			2	2	2	2
1699	4	11	1699	4	21	suh			tempestas tonitru	O		1	2		2	2
1699	4	12	1699	4	22		pluvia per | intervalla[		]pluvia per | intervalla | tonitru	SO S SW		1			2	2
1699	4	13	1699	4	23		pluvia per | intervalla[		]pluvia per | intervalla	O		1			2	2
1699	4	14	1699	4	24	suh	ventus validy[	suh	]ventus validy	O			2	2	2	2
1699	4	15	1699	4	25	suh		suh		O			2	2	2	2
1699	4	16	1699	4	26	suh		suh	minuta | pluvia	O		1	2	2	2	2
1699	4	17	1699	4	27	suh	[previous night: pluvia nocturna][	suh	][previous night: pluvia nocturna]	S		1	2	2	2	2
1699	4	18	1699	4	28		pluvia		pluvia			1			3	3
1699	4	19	1699	4	29	hor		hor		N			3	3	3	3
1699	4	20	1699	4	30	hor		suh		N			3	2	3	2
1699	4	21	1699	5	1	suh	nebula	suh		NW			2	2	2	2
1699	4	22	1699	5	2	hor		suh		NW			3	2	3	2
1699	4	23	1699	5	3	su		su		O			1	1	1	1
1699	4	24	1699	5	4	su		suh		W			1	2	1	2
1699	4	25	1699	5	5	suh	ventus impetuosissimus[		minuta | pluvia ]ventus impetuosissimus	W		1	2		2	2
1699	4	26	1699	5	6	hor		suh		SW			3	2	3	2
1699	4	27	1699	5	7		pluvia continua | tota die[		]pluvia continua | tota die	S W		1			3	3
1699	4	28	1699	5	8		minuta | pluvia	suh		W S		1		2	2	2
1699	4	29	1699	5	9	hor			minuta | pluvia	mixed O NO		1	3		3	2
1699	4	30	1699	5	10		pluvia | ventus frigidy[	hor	]ventus frigidy	NO N NW		1		3	3	3
1699	5	1	1699	5	11	hor	minuta | pluvia	suh		NW		1	3	2	3	2
1699	5	2	1699	5	12	hor		hor		SW			3	3	3	3
1699	5	3	1699	5	13	hor	pluvia continua[		]pluvia continua	SW		1	3		3	3
1699	5	4	1699	5	14		pluvia continua[ | minuta		]pluvia continua	SW		1			2	3
1699	5	5	1699	5	15		pluvia minuta | per intervalla | tota die[		]pluvia minuta | per intervalla | tota die	SW		1			2	2
1699	5	6	1699	5	16		pluvia minuta | per intervalla | tota die[		]pluvia minuta | per intervalla | tota die	NW		1			2	2
1699	5	7	1699	5	17		pluvia | minuta	hor		NO		1		3	2	3
1699	5	8	1699	5	18	hor		hor		NO			3	3	3	3
1699	5	9	1699	5	19	hor		suh		O			3	2	3	2
1699	5	10	1699	5	20	suh		suh		O			2	2	2	2
1699	5	11	1699	5	21	suh		suh		O			2	2	2	2
1699	5	12	1699	5	22		pluvia	suh		NW N		1		2	3	2
1699	5	13	1699	5	23	hor		suh		NO			3	2	3	2
1699	5	14	1699	5	24	suh		su		NO			2	1	2	1
1699	5	15	1699	5	25	su		su		NO			1	1	1	1
1699	5	16	1699	5	26	su		su		O			1	1	1	1
1699	5	17	1699	5	27	su		su		O			1	1	1	1
1699	5	18	1699	5	28	su		su		O			1	1	1	1
1699	5	19	1699	5	29	su		su		O			1	1	1	1
1699	5	20	1699	5	30	su		su		O			1	1	1	1
1699	5	21	1699	5	31	su		su		O			1	1	1	1
1699	5	22	1699	6	1	su		su cl		O SW			1	2	1	2
1699	5	23	1699	6	2	suh			imber	S		1	2		2	3
1699	5	24	1699	6	3	hor			pluvia | tonitru	S		1	3		3	2
1699	5	25	1699	6	4	suh			minuta | pluvia	NO W		1	2		2	2
1699	5	26	1699	6	5	hor			pluvia	W		1	3		3	3
1699	5	27	1699	6	6	suh		su		W			2	1	2	1
1699	5	28	1699	6	7	su		su		O			1	1	1	1
1699	5	29	1699	6	8	su			tempestas	O NW		1	1		1
1699	5	30	1699	6	9	hor			pluvia	W		1	3		3	3
1699	5	31	1699	6	10	suh		suh		W			2	2	2	2
1699	6	1	1699	6	11		pluvia		imber	W S		1			3	3
1699	6	2	1699	6	12	suh		su		W			2	1	2	1
1699	6	3	1699	6	13		[prevous night: tempestas nocturna][ | pluvia	suh	][prevous night: tempestas nocturna]					2	3	2
1699	6	4	1699	6	14	suh		cl		NW			2	3	2	3
1699	6	5	1699	6	15	suh		suh		W			2	2	2	2
1699	6	6	1699	6	16	suh			imber	W		1	2		2	3
1699	6	7	1699	6	17	hor	aer $ frigidus[	hor	]aer $ frigidus	NW			3	3	3	3
1699	6	8	1699	6	18	suh		suh		W			2	2	2	2
1699	6	9	1699	6	19	suh			pluvia	W		1	2		2	3
1699	6	10	1699	6	20		larga | pluvia	suh		NW		1		2	3	2
1699	6	11	1699	6	21	suh	ventus frigidy[		pluvia | ]ventus frigidy	NW			2		2	3
1699	6	12	1699	6	22	suh		su		N O			2	1	2	1
1699	6	13	1699	6	23	su		su		O			1	1	1	1
1699	6	14	1699	6	24		pluvia	suh		W		1		2	3	2
1699	6	15	1699	6	25	suh		suh		NW			2	2	2	2
1699	6	16	1699	6	26		pluvia | tempestas[		]pluvia | tempestas	W		1			3	3
1699	6	17	1699	6	27		pluvia	suh	pluvia	W		1		2	3	2
1699	6	18	1699	6	28	hor			minuta | pluvia	W		1	3		3	2
1699	6	19	1699	6	29	suh		suh		W			2	2	2	2
1699	6	20	1699	6	30		pluvia per | intervalla[		]pluvia per | intervalla	W		1			2	2
1699	6	21	1699	7	1	suh		su		W NW			2	1	2	1
1699	6	22	1699	7	2	su		su		NW			1	1	1	1
1699	6	23	1699	7	3	suh		su		O			2	1	2	1
1699	6	24	1699	7	4	su		su		O			1	1	1	1
1699	6	25	1699	7	5	suh		hor		mixed			2	3	2	3
1699	6	26	1699	7	6		pluvia		venty	W		1			3
1699	6	27	1699	7	7	suh	ventus	su	venty	W			2	1	2	1
1699	6	28	1699	7	8	su		su		W			1	1	1	1
1699	6	29	1699	7	9	suh	ventus frigidy[	suh	]ventus frigidy	NW			2	2	2	2
1699	6	30	1699	7	10	suh		hor	pluvia	NW		1	2	3	2	3
1699	7	1	1699	7	11	suh		su		NW			2	1	2	1
1699	7	2	1699	7	12	suh		su		mixed NO			2	1	2	1
1699	7	3	1699	7	13	su		su		O			1	1	1	1
1699	7	4	1699	7	14	su		su		O			1	1	1	1
1699	7	5	1699	7	15	su		su		NO			1	1	1	1
1699	7	6	1699	7	16	su		su		NO			1	1	1	1
1699	7	7	1699	7	17	su		su		NO			1	1	1	1
1699	7	8	1699	7	18	su		su cl		O			1	2	1	2
1699	7	9	1699	7	19	su		suh	guttae plu- | viales | tempestas e $	N		1	1	2	1	2
1699	7	10	1699	7	20	suh cl		su		N			2	1	2	1
1699	7	11	1699	7	21	suh		suh	guttae | pluviales	NW		1	2	2	2	2
1699	7	12	1699	7	22	su		su		NO			1	1	1	1
1699	7	13	1699	7	23	su		su		NO			1	1	1	1
1699	7	14	1699	7	24	su		su		O			1	1	1	1
1699	7	15	1699	7	25	su		su		O			1	1	1	1
1699	7	16	1699	7	26	cl	pluvia	suh		N		1	3	2	3	2
1699	7	17	1699	7	27	su		su		O			1	1	1	1
1699	7	18	1699	7	28	su		suh cl		O			1	2	1	2
1699	7	19	1699	7	29	su		su		O S O			1	1	1	1
1699	7	20	1699	7	30	su			imber | tonitru	SO		1	1		1	2
1699	7	21	1699	7	31		[previous night: pluvia nocturna][ | pluvia	suh	][previous night: pluvia nocturna]	NW		1		2	3	2
1699	7	22	1699	8	1		pluvia	hor		mixed		1		3	3	3
1699	7	23	1699	8	2	suh		suh		N			2	2	2	2
1699	7	24	1699	8	3	suh		suh		O			2	2	2	2
1699	7	25	1699	8	4	suh		suh		W			2	2	2	2
1699	7	26	1699	8	5		minuta pluvia | per intervalla[		]minuta pluvia | per intervalla	W		1			2	2
1699	7	27	1699	8	6	suh		suh		S SW			2	2	2	2
1699	7	28	1699	8	7		tempestus | levis	suh		SW		1		2		2
1699	7	29	1699	8	8	suh		suh		SW			2	2	2	2
1699	7	30	1699	8	9	suh		suh		SW			2	2	2	2
1699	7	31	1699	8	10	suh		suh		SW			2	2	2	2
1699	8	1	1699	8	11	suh			tempestas	mixed			2		2
1699	8	2	1699	8	12	hor		suh		W			3	2	3	2
1699	8	3	1699	8	13	hor		suh	pluvia	S SW		1	3	2	3	2
1699	8	4	1699	8	14	suh		suh		NW			2	2	2	2
1699	8	5	1699	8	15	hor			imber	S		1	3		3	3
1699	8	6	1699	8	16		minuta | pluvia	hor		W		1		3	2	3
1699	8	7	1699	8	17	suh		su		S			2	1	2	1
1699	8	8	1699	8	18	hor	minuta pluvia[	hor	]minuta pluvia	SW		1	3	3	3	3
1699	8	9	1699	8	19	hor		hor		SW			3	3	3	3
1699	8	10	1699	8	20	hor	minuta pluvia[	hor	]minuta pluvia	SW		1	3	3	3	3
1699	8	11	1699	8	21	su		su		S SO			1	1	1	1
1699	8	12	1699	8	22	su			pluvia	SW		1	1		1	3
1699	8	13	1699	8	23	hor		suh	venty | validy	W			3	2	3	2
1699	8	14	1699	8	24		pluvia[		]pluvia	W		1			3	3
1699	8	15	1699	8	25	hor	tempestas nocturna[	hor	]tempestas nocturna	W			3	3	3	3
1699	8	16	1699	8	26		imber	suh	pluvia	NW		1		2	3	2
1699	8	17	1699	8	27	hor		hor		NW			3	3	3	3
1699	8	18	1699	8	28	hor		suh		NO			3	2	3	2
1699	8	19	1699	8	29	su		su		NO			1	1	1	1
1699	8	20	1699	8	30	suh		hor		NO S SW			2	3	2	3
1699	8	21	1699	8	31	hor		su		SO			3	1	3	1
1699	8	22	1699	9	1	su		su		O			1	1	1	1
1699	8	23	1699	9	2	hor		suh		NW			3	2	3	2
1699	8	24	1699	9	3	su		suh		O S SO			1	2	1	2
1699	8	25	1699	9	4		pluvia	hor		W		1		3	3	3
1699	8	26	1699	9	5		pluvia	suh		W		1		2	3	2
1699	8	27	1699	9	6		pluvia			SW S		1			3
1699	8	28	1699	9	7		pluvia	suh		W		1		2	3	2
1699	8	29	1699	9	8		minuta | pluvia	suh		W		1		2	2	2
1699	8	30	1699	9	9	su		su		SO			1	1	1	1
1699	8	31	1699	9	10	su		su		SO			1	1	1	1
1699	9	1	1699	9	11	su		su		O NO			1	1	1	1
1699	9	2	1699	9	12	su		su		O			1	1	1	1
1699	9	3	1699	9	13	su		su		O			1	1	1	1
1699	9	4	1699	9	14	su		su		O			1	1	1	1
1699	9	5	1699	9	15	suh		su		NO			2	1	2	1
1699	9	6	1699	9	16	su		su		O			1	1	1	1
1699	9	7	1699	9	17	su		su		O			1	1	1	1
1699	9	8	1699	9	18	su		suh		O			1	2	1	2
1699	9	9	1699	9	19	su		su		O			1	1	1	1
1699	9	10	1699	9	20	su		su		O			1	1	1	1
1699	9	11	1699	9	21	su		su		O			1	1	1	1
1699	9	12	1699	9	22	su		su		O			1	1	1	1
1699	9	13	1699	9	23	suh su		su		S			2	1	2	1
1699	9	14	1699	9	24	suh		su		S SW			2	1	2	1
1699	9	15	1699	9	25	su	[previous night: pluvia nocturna][	su	][previous night: pluvia nocturna]	S		1	1	1	1	1
1699	9	16	1699	9	26	su		su		mixed NW			1	1	1	1
1699	9	17	1699	9	27		pluvia	suh	aestus	S		1		2	3	2
1699	9	18	1699	9	28	suh		hor		W			2	3	2	3
1699	9	19	1699	9	29	suh		suh		NW			2	2	2	2
1699	9	20	1699	9	30	su		su		SO S SW			1	1	1	1
1699	9	21	1699	10	1	hor		suh		S			3	2	3	2
1699	9	22	1699	10	2	suh		hor		S			2	3	2	3
1699	9	23	1699	10	3	hor		hor		S			3	3	3	3
1699	9	24	1699	10	4		[previous night: pluvia nocturna][| pluvia[		][previous night: pluvia nocturna] | ]pluvia	SW		1			3	3
1699	9	25	1699	10	5	hor		suh		W			3	2	3	2
1699	9	26	1699	10	6		nebula	hor		NO				3	3	3
1699	9	27	1699	10	7	hor		hor		O			3	3	3	3
1699	9	28	1699	10	8	suh		su		O			2	1	2	1
1699	9	29	1699	10	9		nebula	suh		O				2	3	2
1699	9	30	1699	10	10		nebula	hor		O				3	3	3
1699	10	1	1699	10	11	suh		su		O			2	1	2	1
1699	10	2	1699	10	12		nebula	hor		SO				3	3	3
1699	10	3	1699	10	13	hor		suh		S			3	2	3	2
1699	10	4	1699	10	14	su			pluvia	SW		1	1		1	3
1699	10	5	1699	10	15		nebula | pluvia larga | per intervalla[		]pluvia larga | per intervalla	SW		1			2	2
1699	10	6	1699	10	16	suh		su		NO			2	1	2	1
1699	10	7	1699	10	17		nix		pluvia	W		3			3	3
1699	10	8	1699	10	18	suh		suh		O			2	2	2	2
1699	10	9	1699	10	19	su		su		O			1	1	1	1
1699	10	10	1699	10	20	su		su		O			1	1	1	1
1699	10	11	1699	10	21	su		su		O			1	1	1	1
1699	10	12	1699	10	22	su		suh		SO			1	2	1	2
1699	10	13	1699	10	23	su		suh		SO			1	2	1	2
1699	10	14	1699	10	24	su		su		SO			1	1	1	1
1699	10	15	1699	10	25	su		su		SO			1	1	1	1
1699	10	16	1699	10	26	su		su		SO			1	1	1	1
1699	10	17	1699	10	27	su		su		SO			1	1	1	1
1699	10	18	1699	10	28	su		su		O			1	1	1	1
1699	10	19	1699	10	29	su		su		NO			1	1	1	1
1699	10	20	1699	10	30	su	ventus validus[	su	]ventus validus	NO			1	1	1	1
1699	10	21	1699	10	31	su	frigus[	su	]frigus	O			1	1	1	1
1699	10	22	1699	11	1	su		su		O			1	1	1	1
1699	10	23	1699	11	2	hor		hor		O			3	3	3	3
1699	10	24	1699	11	3	hor		hor		SO			3	3	3	3
1699	10	25	1699	11	4		minuta pluvia[		]minuta pluvia | iris	S SW		1			2	2
1699	10	26	1699	11	5	su		su		SO			1	1	1	1
1699	10	27	1699	11	6	hor		suh		SO			3	2	3	2
1699	10	28	1699	11	7	su		su		SO			1	1	1	1
1699	10	29	1699	11	8	hor		hor		SO			3	3	3	3
1699	10	30	1699	11	9	hor		hor		S			3	3	3	3
1699	10	31	1699	11	10	su		su		W			1	1	1	1
1699	11	1	1699	11	11	hor		hor	pluvia	W		1	3	3	3	3
1699	11	2	1699	11	12	su		su		SW			1	1	1	1
1699	11	3	1699	11	13	su		su		SO			1	1	1	1
1699	11	4	1699	11	14	suh		suh		SW			2	2	2	2
1699	11	5	1699	11	15	su		su		S			1	1	1	1
1699	11	6	1699	11	16	su		su		S			1	1	1	1
1699	11	7	1699	11	17		nebula			S					3
1699	11	8	1699	11	18		nebula	hor		SW				3	3	3
1699	11	9	1699	11	19	su		suh		NO			1	2	1	2
1699	11	10	1699	11	20	su		su		O			1	1	1	1
1699	11	11	1699	11	21	su		su		mixed			1	1	1	1
1699	11	12	1699	11	22	su		su		mixed			1	1	1	1
1699	11	13	1699	11	23	su		su		O			1	1	1	1
1699	11	14	1699	11	24	hor		hor		W			3	3	3	3
1699	11	15	1699	11	25		pluvia nocturna | ventus impetuosy[		]pluvia nocturna | ventus impetuosy	SW		1			3	3
1699	11	16	1699	11	26	hor		hor	ventus	NW			3	3	3	3
1699	11	17	1699	11	27		minuta pluvia | obscura dies[		]minuta pluvia | obscura dies	W		1			2	2
1699	11	18	1699	11	28	suh		suh		W			2	2	2	2
1699	11	19	1699	11	29	su		su		W			1	1	1	1
1699	11	20	1699	11	30	su		su		SO S			1	1	1	1
1699	11	21	1699	12	1			hor		SW				3		3
1699	11	22	1699	12	2	hor			pluvia | obscura dies	W			3		3	3
1699	11	23	1699	12	3	suh		suh		W			2	2	2	2
1699	11	24	1699	12	4		nebula	hor		mixed				3	3	3
1699	11	25	1699	12	5	su		su		O			1	1	1	1
1699	11	26	1699	12	6	hor		hor		SO S			3	3	3	3
1699	11	27	1699	12	7	hor		hor		SW W			3	3	3	3
1699	11	28	1699	12	8	suh	[previous night: nix nocturna][	hor	][previous night: nix nocturna]	W		2	2	3	2	3
1699	11	29	1699	12	9		nix		nix	SO		2			3	3
1699	11	30	1699	12	10		nix minuta[		]nix minuta	W		2			2	2
1699	12	1	1699	12	11		nix		nix	NW		2			3	3
1699	12	2	1699	12	12	su		su		O			1	1	1	1
1699	12	3	1699	12	13	su	frigus | intensu	su	remissum	O SO			1	1	1	1
1699	12	4	1699	12	14		minuta | pluvia		nix	NO		3			2	3
1699	12	5	1699	12	15	su		suh		SO			1	2	1	2
1699	12	6	1699	12	16	suh		suh		SO			2	2	2	2
1699	12	7	1699	12	17	su		su		SO			1	1	1	1
1699	12	8	1699	12	18	suh		suh		SO			2	2	2	2
1699	12	9	1699	12	19	su		su		SO			1	1	1	1
1699	12	10	1699	12	20	suh		suh		SO			2	2	2	2
1699	12	11	1699	12	21	hor		hor	nebula	mixed			3	3	3	3
1699	12	12	1699	12	22	hor		hor		W mixed SO			3	3	3	3
1699	12	13	1699	12	23	hor			pluvia	SW		1	3		3	3
1699	12	14	1699	12	24		pluvia	hor		SW		1		3	3	3
1699	12	15	1699	12	25	hor			pluvia	NW		1	3		3	3
1699	12	16	1699	12	26		nix	hor		NW NO		2		3	3	3
1699	12	17	1699	12	27	suh	parum ninxit[	hor	]parum ninxit	mixed NW		2	2	3	2	3
1699	12	18	1699	12	28	suh		suh		NW			2	2	2	2
1699	12	19	1699	12	29	suh		suh		NW			2	2	2	2
1699	12	20	1699	12	30	hor		hor		NW			3	3	3	3
1699	12	21	1699	12	31	suh		suh		NW			2	2	2	2
1699	12	22	1700	1	1		frigy | intensum	hor	remiss.	mixed				3		3
1699	12	23	1700	1	2	hor		hor		W			3	3	3	3
1699	12	24	1700	1	3	hor		hor		W			3	3	3	3
1699	12	25	1700	1	4	suh		suh		S			2	2	2	2
1699	12	26	1700	1	5		ninxit tota die[		]ninxit tota die	S SW		2			3	3
1699	12	27	1700	1	6	hor			ninxit	W		2	3		3	3
1699	12	28	1700	1	7	hor		hor		NO			3	3	3	3
1699	12	29	1700	1	8	suh		suh		NO S			2	2	2	2
1699	12	30	1700	1	9	hor		hor		S			3	3	3	3
1699	12	31	1700	1	10	hor			liquefait	SW			3		3
1700	1	1	1700	1	11	hor		suh	liquefait	W			3	2	3	2
1700	1	2	1700	1	12		nix	hor		NW		2		3	3	3
1700	1	3	1700	1	13		nix et pluvia[		]nix et pluvia	W		2			3	3
1700	1	4	1700	1	14		minuta pluvia | obscura dies[		]minuta pluvia | obscura dies	W		1			2	2
1700	1	5	1700	1	15		nebula	su		O				1	3	1
1700	1	6	1700	1	16	hor		hor		O			3	3	3	3
1700	1	7	1700	1	17	hor		hor		SO NW			3	3	3	3
1700	1	8	1700	1	18	hor		hor		SW			3	3	3	3
1700	1	9	1700	1	19	hor	nebula[	hor	]nebula	SW			3	3	3	3
1700	1	10	1700	1	20		nebula tota die[		]nebula tota die	SW					3	3
1700	1	11	1700	1	21	hor	nebula[	hor	]nebula	NW			3	3	3	3
1700	1	12	1700	1	22	hor		suh		NW			3	2	3	2
1700	1	13	1700	1	23		nix et pluvia[		]nix et pluvia	NW		3			3	3
1700	1	14	1700	1	24	hor	ventis vehemens[	hor	]ventis vehemens	NW			3	3	3	3
1700	1	15	1700	1	25		nix et pluvia | venty impetuosy[		]nix et pluvia | venty impetuosy	NW		3			3	3
1700	1	16	1700	1	26	suh		hor	nix	NW		2	2	3	2	3
1700	1	17	1700	1	27	suh		suh		SW			2	2	2	2
1700	1	18	1700	1	28	hor		hor	nix	S		2	3	3	3	3
1700	1	19	1700	1	29	hor		hor	nix	SW		2	3	3	3	3
1700	1	20	1700	1	30		nix	hor		SW		2		3	3	3
1700	1	21	1700	1	31		pluvia	hor		SW		1		3	3	3
1700	1	22	1700	2	1		nix et pluvia[		]nix et pluvia	SW		3			3	3
1700	1	23	1700	2	2		nix	hor		S		2		3		3
1700	1	24	1700	2	3	suh		hor		S			2	3	2	3
1700	1	25	1700	2	4	hor		hor		S			3	3	3	3
1700	1	26	1700	2	5	hor			nix et | pluvia	S		3	3		3	3
1700	1	27	1700	2	6		nix et pluvia[		]nix et pluvia	S		3			3	3
1700	1	28	1700	2	7	suh		hor		mixed W			2	3	2	3
1700	1	29	1700	2	8	su		su		SO			1	1	1	1
1700	1	30	1700	2	9	su		su		O SO			1	1	1	1
1700	1	31	1700	2	10		nix	hor		S				3	3	3
1700	2	1	1700	2	11	suh		su		O			2	1	2	1
1700	2	2	1700	2	12	su		su		O			1	1	1	1
1700	2	3	1700	2	13	su		su		S			1	1	1	1
1700	2	4	1700	2	14		pluvia	hor		SW W		1		3	3	3
1700	2	5	1700	2	15	suh		hor		SW			2	3	2	3
1700	2	6	1700	2	16	suh		hor	nix	W		2	2	3	2	3
1700	2	7	1700	2	17	suh		hor	nix	SW		2	2	3	2	3
1700	2	8	1700	2	18	suh			nix | copiosa	W		2	2		2	3
1700	2	9	1700	2	19	suh		hor		O N NW			2	3	2	3
1700	2	10	1700	2	20	suh		suh		W			2	2	2	2
1700	2	11	1700	2	21	su		su		O			1	1	1	1
1700	2	12	1700	2	22	su		su		O			1	1	1	1
1700	2	13	1700	2	23	su		hor		O			1	3	1	3
1700	2	14	1700	2	24	su		su		O SO			1	1	1	1
1700	2	15	1700	2	25		nix	suh		SO		2		2	3	2
1700	2	16	1700	2	26	hor		hor		SO			3	3	3	3
1700	2	17	1700	2	27	suh		hor		SW W			2	3	2	3
1700	2	18	1700	2	28	hor			minuta | pluvia	S SW		1	3		3	2
1700	3	1	1700	3	1	suh		su		SO			2	1	2	1
1700	3	2	1700	3	2	suh		hor		SO			2	3	2	3
1700	3	3	1700	3	3	hor		hor		SO O			3	3	3	3
1700	3	4	1700	3	4	hor			minuta | pluvia	SO mixed		1	3		3	2
1700	3	5	1700	3	5		nix capiosa[		]nix capiosa	O SO		2			3	3
1700	3	6	1700	3	6		nebula	hor	nix	O mixed NW		2		3	3	3
1700	3	7	1700	3	7		nix rara[		]nix rara	NW		2			2	2
1700	3	8	1700	3	8	suh		su		O			2	1	2	1
1700	3	9	1700	3	9	suh		hor		O S			2	3	2	3
1700	3	10	1700	3	10	hor		hor		W			3	3	3	3
1700	3	11	1700	3	11	suh		suh		SO			2	2	2	2
1700	3	12	1700	3	12	su		su		SO			1	1	1	1
1700	3	13	1700	3	13	su hor		hor		O			2	3	2	3
1700	3	14	1700	3	14	su		su		O			1	1	1	1
1700	3	15	1700	3	15	su		su		O			1	1	1	1
1700	3	16	1700	3	16	su		su		O			1	1	1	1
1700	3	17	1700	3	17	su		su		O W			1	1	1	1
1700	3	18	1700	3	18	hor		hor		W			3	3	3	3
1700	3	19	1700	3	19	hor		hor		N NO O			3	3	3	3
1700	3	20	1700	3	20	hor		hor		O			3	3	3	3
1700	3	21	1700	3	21	su		su		NO			1	1	1	1
1700	3	22	1700	3	22	su		suh		O W			1	2	1	2
1700	3	23	1700	3	23	suh		suh		NW N			2	2	2	2
1700	3	24	1700	3	24	su		suh		N NW			1	2	1	2
1700	3	25	1700	3	25	su		su		NO			1	1	1	1
1700	3	26	1700	3	26	hor	nix	su		NO		2	3	1	3	1
1700	3	27	1700	3	27	hor	nix	suh		NO		2	3	2	3	2
1700	3	28	1700	3	28	hor		suh		O			3	2	3	2
1700	3	29	1700	3	29	suh		hor		O SO			2	3	2	3
1700	3	30	1700	3	30	suh	ventus valides[	su	]ventus valides	O			2	1	2	1
1700	3	31	1700	3	31	su		su		O			1	1	1	1
1700	4	1	1700	4	1	su		su		O			1	1	1	1
1700	4	2	1700	4	2	su		su		O			1	1	1	1
1700	4	3	1700	4	3	su		suh		O mixed			1	2	1	2
1700	4	4	1700	4	4	hor		suh		NO			3	2	3	2
1700	4	5	1700	4	5	hor		hor		O			3	3	3	3
1700	4	6	1700	4	6	su		suh		O SO W			1	2	1	2
1700	4	7	1700	4	7	suh		suh		NW			2	2	2	2
1700	4	8	1700	4	8	suh		suh		mixed			2	2	2	2
1700	4	9	1700	4	9	hor		hor		S			3	3	3	3
1700	4	10	1700	4	10	hor		hor		S SO O			3	3	3	3
1700	4	11	1700	4	11	suh		suh		O			2	2	2	2
1700	4	12	1700	4	12	su		suh hor		O W			1	2	1	2
1700	4	13	1700	4	13	suh		suh		W			2	2	2	2
1700	4	14	1700	4	14	suh		hor		S SW			2	3	2	3
1700	4	15	1700	4	15		pluvia[		]pluvia	SW		1			3	3
1700	4	16	1700	4	16		pluvia per | intervalla[		]pluvia per | intervalla	SW O		1			2	2
1700	4	17	1700	4	17		pluvia[		]pluvia	NW		1			3	3
1700	4	18	1700	4	18		pluvia continua | tota die[		]pluvia continua | tota die	NW		1			3	3
1700	4	19	1700	4	19		pluvia	suh		S		1		2	3	2
1700	4	20	1700	4	20	suh	nebula	suh		O			2	2	2	2
1700	4	21	1700	4	21	suh		hor	pluvia	O		1	2	3	2	3
1700	4	22	1700	4	22		pluvia per | intervalla[		]pluvia per | intervalla	W		1			2	2
1700	4	23	1700	4	23	suh		suh					2	2	2	2
1700	4	24	1700	4	24	hor			pluvia	S SW		1	3		3	3
1700	4	25	1700	4	25		pluvia[		]pluvia	S SW		1			3	3
1700	4	26	1700	4	26		pluvia per | intervalla[		]pluvia per | intervalla	S		1			2	2
1700	4	27	1700	4	27		pluvia per | intervalla[		]pluvia per | intervalla	S SW		1			2	2
1700	4	28	1700	4	28		pluvia	suh		S SO		1		2	3	2
1700	4	29	1700	4	29	hor		hor		NW			3	3	3	3
1700	4	30	1700	4	30		minuta | pluvia	hor		NW		1		3	2	3
1700	5	1	1700	5	1	suh		hor		N			2	3	2	3
1700	5	2	1700	5	2	su		su		O			1	1	1	1
1700	5	3	1700	5	3	su		su		O			1	1	1	1
1700	5	4	1700	5	4	su		su		O			1	1	1	1
1700	5	5	1700	5	5	su		suh cl		O			1	2	1	2
1700	5	6	1700	5	6	su		su		NO mixed			1	1	1	1
1700	5	7	1700	5	7	su		su		O S			1	1	1	1
1700	5	8	1700	5	8	hor			tempestas | pluvia	W O		1	3		3	3
1700	5	9	1700	5	9	suh cl		su		W			2	1	2	1
1700	5	10	1700	5	10	suh cl		su		O			2	1	2	1
1700	5	11	1700	5	11	suh		suh cl	pluvia	O		1	2	2	2	2
1700	5	12	1700	5	12	suh		suh	pluvia	O		1	2	2	2	2
1700	5	13	1700	5	13	suh		suh		O			2	2	2	2
1700	5	14	1700	5	14	suh		suh		O SO			2	2	2	2
1700	5	15	1700	5	15	suh		su		W NW			2	1	2	1
1700	5	16	1700	5	16		pluvia	suh		W SO		1		2	3	2
1700	5	17	1700	5	17	hor	[previous night: pluvia nocturna][	hor	][previous night: pluvia nocturna]	W NW		1	3	3	3	3
1700	5	18	1700	5	18	suh		suh		W			2	2	2	2
1700	5	19	1700	5	19	suh		suh		W			2	2	2	2
1700	5	20	1700	5	20	suh		su		SO			2	1	2	1
1700	5	21	1700	5	21	suh		suh		SW S SO			2	2	2	2
1700	5	22	1700	5	22	suh		hor	pluvia | minuta	SW S		1	2	3	2	3
1700	5	23	1700	5	23	suh	[previous night: pluvia nocturna][	suh	][previous night: pluvia nocturna]	W		1	2	2	2	2
1700	5	24	1700	5	24	suh	pluvia	suh		NW		1	2	2	2	2
1700	5	25	1700	5	25	suh		suh		O			2	2	2	2
1700	5	26	1700	5	26	suh		hor	minuta | pluvia	SW S		1	2	3	2	3
1700	5	27	1700	5	27		[previous night: pluvia nocturna][ | pluvia	hor	][previous night: pluvia nocturna]	NW		1		3	3	3
1700	5	28	1700	5	28	hor	pluvia minuta[	hor	]pluvia minuta	NO		1	3	3	3	3
1700	5	29	1700	5	29	hor			minuta | pluvia	NO		1	3		3	2
1700	5	30	1700	5	30		pluvia[		]pluvia	O		1			3	3
1700	5	31	1700	5	31	suh		suh		O			2	2	2	2
1700	6	1	1700	6	1	hor			minuta | pluvia	O		1	3		3	2
1700	6	2	1700	6	2	su		hor	minuta | pluvia	O		1	1	3	1	3
1700	6	3	1700	6	3	suh			pluvia	NO		1	2		2	3
1700	6	4	1700	6	4	suh			pluvia	NO		1	2		2	3
1700	6	5	1700	6	5	suh		suh		SO			2	2	2	2
1700	6	6	1700	6	6		pluvia	suh hor		W N		1		2	3	2
1700	6	7	1700	6	7		pluvia larga | tota die[		]pluvia larga | tota die	O W		1			3	3
1700	6	8	1700	6	8	hor		hor		W			3	3	3	3
1700	6	9	1700	6	9	hor		suh	minuta pluvia	W		1	3	2	3	2
1700	6	10	1700	6	10	suh		suh	minuta | pluvia	W		1	2	2	2	2
1700	6	11	1700	6	11	suh		suh		NW			2	2	2	2
1700	6	12	1700	6	12	suh		suh	minuta | pluvia	W NO		1	2	2	2	2
1700	6	13	1700	6	13	suh		suh		NO			2	2	2	2
1700	6	14	1700	6	14	suh		suh		SO			2	2	2	2
1700	6	15	1700	6	15	suh		suh		O			2	2	2	2
1700	6	16	1700	6	16	su		su		O			1	1	1	1
1700	6	17	1700	6	17	su			tempestas | pluvia	O W		1	1		1	3
1700	6	18	1700	6	18		pluvia	hor suh		W		1		2	3	2
1700	6	19	1700	6	19	suh		suh		W			2	2	2	2
1700	6	20	1700	6	20	suh		suh		W			2	2	2	2
1700	6	21	1700	6	21		pluvia	suh		W		1		2	3	2
1700	6	22	1700	6	22	hor		suh		W			3	2	3	2
1700	6	23	1700	6	23	hor			pluvia	W		1	3		3	3
1700	6	24	1700	6	24	hor	pluvia	suh		NW		1	3	2	3	2
1700	6	25	1700	6	25		pluvia	hor	frigus	NW		1		3	3	3
1700	6	26	1700	6	26		pluvia per | intervalla[		]pluvia per | intervalla	NW	frigy	1			2	2
1700	6	27	1700	6	27	hor	pluvia	hor		NW		1	3	3	3	3
1700	6	28	1700	6	28	su		su		SW			1	1	1	1
1700	6	29	1700	6	29	suh	[previous night: pluvia nocturna][	suh	][previous night: pluvia nocturna]	W		1	2	2	2	2
1700	6	30	1700	6	30	suh		su		mixed W			2	1	2	1
1700	7	1	1700	7	1	su		su		SW			1	1	1	1
1700	7	2	1700	7	2	su			tempestas	S			1		1
[truncated: 1,618 more rows]
