# Supplementary material for: The weather diary of Georg Christoph Eimmart for Nuremberg, 1695–1704
Source: Copernicus journal article supplement (doi:10.5194/cp-2022-98), 2023-01-26
Supplement: Supplementary file 2 [file Europe_T2_DE_Jena_1702_subdaily.xls]

## Sheet: Template
Date			Bar	Wind
Year	Month	Day	(27” Rheinl. + x/120”)	direction
1702	1	1	154	S
1702	1	2	172	WSW
1702	1	3	175	SO
1702	1	4	157	SO
1702	1	5	124	S
1702	1	6	90	SSO
1702	1	7	71	S
1702	1	8	86	SW
1702	1	9	36	SSO
1702	1	10	68	SgO
1702	1	11	105	WgN
1702	1	12	94	SO
1702	1	13	81	SSO
1702	1	14	85	ONO
1702	1	15	109	OgN
1702	1	16	129	ONO
1702	1	17	134	OgN
1702	1	18	135	O
1702	1	19	136	OSO
1702	1	20	162	SW
1702	1	21	140	SSO
1702	1	22	128	S
1702	1	23	113	S
1702	1	24	100	S
1702	1	25	114	WSW
1702	1	26	175	S
1702	1	27	171	WgS
1702	1	28	186	SSW
1702	1	29	179	SO
1702	1	30	198	W
1702	1	31	186	S
1702	2	1	180	SSW
1702	2	2	132	SSW
1702	2	3	146	SSW
1702	2	4	177	W
1702	2	5	147	WSW
1702	2	6	175	S
1702	2	7	170	SW
1702	2	8	189	WNW
1702	2	9	193	S
1702	2	10	208	WgN
1702	2	11	193	SgW
1702	2	12	177	SSO
1702	2	13	160	W
1702	2	14	128	S
1702	2	15	41	SW
1702	2	16	81	W
1702	2	17	80	SO
1702	2	18	99	W
1702	2	19	87	OSO
1702	2	20	128	WNW
1702	2	21	138	S
1702	2	22	98	SO
1702	2	23	100	SgW
1702	2	24	124	S
1702	2	25	150	N
1702	2	26	128	S
1702	2	27	96	W
1702	2	28	92	W
1702	3	1	139	NW
1702	3	2	117	SgW
1702	3	3	84	SW
1702	3	4	100	WgS
1702	3	5	127	W
1702	3	6	171	O
1702	3	7	156	SSO
1702	3	8	134	NW
1702	3	9	179	WgS
1702	3	10	154	SSW
1702	3	11	107	S
1702	3	12	111	W
1702	3	13	114	NW
1702	3	14	157	WgN
1702	3	15	132	W
1702	3	16	180	S
1702	3	17	169	SgO
1702	3	18	161	S
1702	3	19	179	O
1702	3	20	181	O
1702	3	21	201	O
1702	3	22	226	SgO
1702	3	23	216	NNO
1702	3	24	191	WgN
1702	3	25	178	N
1702	3	26	162	WgN
1702	3	27	153	WNW
1702	3	28	152	W
1702	3	29	161	ONO
1702	3	30	144	WgN
1702	3	31	190	O
1702	4	1	204	O
1702	4	2	154	SgO
1702	4	3	143	WgN
1702	4	4	112	W
1702	4	5	56	W
1702	4	6	83	WNW
1702	4	7	120	N
1702	4	8	134	NW
1702	4	9	138	O
1702	4	10	132	WgN
1702	4	11	117	NNO
1702	4	12	114	O
1702	4	13	120	SgW
1702	4	14	125	WSW
1702	4	15	86	S
1702	4	16	90	WNW
1702	4	17	117	W
1702	4	18	132	WgN
1702	4	19	140	S
1702	4	20	133	N
1702	4	21	124	S
1702	4	22	112	W
1702	4	23	120	WgS
1702	4	24	128	S
1702	4	25	130	W
1702	4	26	117	NW
1702	4	27	118	OgN
1702	4	28	127	O
1702	4	29	116	O
1702	4	30	111	SO
1702	5	1	89	S
1702	5	2	81	NgO
1702	5	3	110	NW
1702	5	4	131	WNW
1702	5	5	140	OgN
1702	5	6	138	ONO
1702	5	7	151	O
1702	5	8	160	O
1702	5	9	154	O
1702	5	10	160	N
1702	5	11	145	S
1702	5	12	111	S
1702	5	13	107	SSW
1702	5	14	137	W
1702	5	15	147	O
1702	5	16	122	OgN
1702	5	17	124	O
1702	5	18	130	OgN
1702	5	19	133	O
1702	5	20	141	O
1702	5	21	143	ONO
1702	5	22	130	OgN
1702	5	23	96	NNO
1702	5	24	116	O
1702	5	25	114	SgW
1702	5	26	121	O
1702	5	27	113	ONO
1702	5	28	122	O
1702	5	29	120	O
1702	5	30	124	OgW
1702	5	31	120	O
1702	6	1	114	O
1702	6	2	114	S
1702	6	3	106	SSO
1702	6	4	95	O
1702	6	5	112	OgN
1702	6	6	125	WgN
1702	6	7	120	S
1702	6	8	106	O
1702	6	9	105	O
1702	6	10	108	S
1702	6	11	102	O
1702	6	12	108	OgN
1702	6	13	109	NW
1702	6	14	117	NO
1702	6	15	109	SO
1702	6	16	90	NO
1702	6	17	97	ONO
1702	6	18	98	NO
1702	6	19	80	S
1702	6	20	87	SO
1702	6	21	110	W
1702	6	22	102	SO
1702	6	23	75	SSO
1702	6	24	90	WSW
1702	6	25	111	NgW
1702	6	26	94	S
1702	6	27	100	S
1702	6	28	101	WgN
1702	6	29	114	WSW
1702	6	30	82	WSW
1702	7	1	90	SW
1702	7	2	110	O
1702	7	3	95	S
1702	7	4	89	W
1702	7	5	81	S
1702	7	6	76	S
1702	7	7	103	WNW
1702	7	8	110	OgS
1702	7	9	81	S
1702	7	10	113	S
1702	7	11	112	S
1702	7	12	105	OgN
1702	7	13	108	NgO
1702	7	14	114	N
1702	7	15	117	WNW
1702	7	16	117	NW
1702	7	17	126	OgN
1702	7	18	93	SgO
1702	7	19	71	SgW
1702	7	20	67	S
1702	7	21	72	WgN
1702	7	22	90	W
1702	7	23	95	SgW
1702	7	24	102	SgW
1702	7	25	77	S
1702	7	26	118	SW
1702	7	27	132	WgN
1702	7	28	118	S
1702	7	29	104	S
1702	7	30	90	WgN
1702	7	31	103	N
1702	8	1	199	S
1702	8	2	126	NNW
1702	8	3	136	W
1702	8	4	121	S
1702	8	5	100	WgS
1702	8	6	96	O
1702	8	7	100	ONO
1702	8	8	91	SSO
1702	8	9	90	OgN
1702	8	10	109	W
1702	8	11	112	O
1702	8	12	89	O
1702	8	13	83	W
1702	8	14	99	W
1702	8	15	82	W
1702	8	16	106	SO
1702	8	17	92	SO
1702	8	18	102	SO
1702	8	19	115	ONO
1702	8	20	108	W
1702	8	21	110	S
1702	8	22	96	S
1702	8	23	80	W
1702	8	24	82	SgO
1702	8	25	76	S
1702	8	26	44	SgO
1702	8	27	77	S
1702	8	28	82	W
1702	8	29	85	WgN
1702	8	30	108	W
1702	8	31	120	OgN
1702	9	1	119	S
1702	9	2	77	S
1702	9	3	98	NO
1702	9	4	140	WNW
1702	9	5	132	SSO
1702	9	6	109	SO
1702	9	7	105	SgO
1702	9	8	100	S
1702	9	9	111	W
1702	9	10	112	S
1702	9	11	110	WgS
1702	9	12	134	N
1702	9	13	126	NO
1702	9	14	114	NNO
1702	9	15	109	O
1702	9	16	76	SO
1702	9	17	99	NNO
1702	9	18	109	W
1702	9	19	98	WgS
1702	9	20	90	WgS
1702	9	21	116	W
1702	9	22	151	W
1702	9	23	125	S
1702	9	24	100	SSO
1702	9	25	60	WgS
1702	9	26	77	S
1702	9	27	86	W
1702	9	28	98	S
1702	9	29	94	W
1702	9	30	121	W
1702	10	1	107	SW
1702	10	2	126	W
1702	10	3	90	S
1702	10	4	82	W
1702	10	5	133	NW
1702	10	6	141	N
1702	10	7	174	O
1702	10	8	179	O
1702	10	9	159	SO
1702	10	10	131	S
1702	10	11	143	ONO
1702	10	12	134	S
1702	10	13	126	SO
1702	10	14	117	S
1702	10	15	108	S
1702	10	16	110	S
1702	10	17	105	S
1702	10	18	90	SO
1702	10	19	109	W
1702	10	20	138	NO
1702	10	21	84	S
1702	10	22	46	S
1702	10	23	21	NO
1702	10	24	75	SgO
1702	10	25	86	S
1702	10	26	90	SSO
1702	10	27	114	W
1702	10	28	154	SW
1702	10	29	169	S
1702	10	30	157	SO
1702	10	31	110	SgO
1702	11	1	173	NW
1702	11	2	199	SO
1702	11	3	180	W
1702	11	4	173	SSO
1702	11	5	141	OgN
1702	11	6	125	ONO
1702	11	7	121	W
1702	11	8	109	NO
1702	11	9	151	N
1702	11	10	143	W
1702	11	11	153	O
1702	11	12	147	SO
1702	11	13	182	S
1702	11	14	173	S
1702	11	15	141	S
1702	11	16	130	S
1702	11	17	125	W
1702	11	18	93	S
1702	11	19	152	SO
1702	11	20	156	S
1702	11	21	177	W
1702	11	22	126	WSW
1702	11	23	152	WNW
1702	11	24	150	SSO
1702	11	25	170	WgN
1702	11	26	166	S
1702	11	27	137	OSO
1702	11	28	125	S
1702	11	29	138	SO
1702	11	30	133	SO
1702	12	1	144	SW
1702	12	2	145	OSO
1702	12	3	95	SSO
1702	12	4	86	SO
1702	12	5	84	S
1702	12	6	99	W
1702	12	7	111	NW
1702	12	8	154	N
1702	12	9	158	SSO
1702	12	10	177	SO
1702	12	11	119	S
1702	12	12	121	S
1702	12	13	118	S
1702	12	14	103	SO
1702	12	15	58	SgW
1702	12	16	105	W
1702	12	17	144	S
1702	12	18	100	OSO
1702	12	19	46	S
1702	12	20	16	SO
1702	12	21	102	W
1702	12	22	184	W
1702	12	23	142	S
1702	12	24	165	SO
1702	12	25	99	S
1702	12	26	44	W
1702	12	27	94	W
1702	12	28	126	W
1702	12	29	133	S
1702	12	30	103	S
1702	12	31	76	S
