# Supplementary material for: The weather diary of Georg Christoph Eimmart for Nuremberg, 1695–1704
Source: Copernicus journal article supplement (doi:10.5194/cp-2022-98), 2023-01-26
Supplement: Supplementary file 3 [file Europe_T2_RU_Kaliningrad_1702_subdaily.xls]

## Sheet: Template
Year	Month	Day	Hour	Winde	Barometer		Thermometer		Hygrometer		Beschaffenheit des Gewitters
1702	1	1	M	SW	29	0	1	0	0	8	Dicker / starcker Schnee / hefftger Wind.
1702	1	1	N	W	29	0	1	0	0	8	Stillere hellere Lufft / Sonnenblicke.
1702	1	1	A	SW	29	0	1	0	0	9	Hagel / Schnee / windigt.
1702	1	2	M	SW	29	1	0.25	0	0	7	Schnee Sturm.
1702	1	2	N	SW	29	0	1.125	0	0	5	Etwas auffgeklart / windigt.
1702	1	2	A	W	29	1	1.25	0	0	4	klar bestirnt / doch mit Bewölck.
1702	1	3	M	W	28	11	1.25	0	0	6	Klar / heiter Wetter / kalt.
1702	1	3	N	SW	28	11	1.25	0	0	5	Dunckler / kalt. (Regen / Glad-Eiß
1702	1	3	A	NW	28	10	1.375	0	0	3	Gelindre Kält / Schnee / sturm / Nacht
1702	1	4	M	NW	28	10	1.5	0	0	3	Neblicht / schnee / Schlagg' Dauwetter / gladEiß
1702	1	4	N	NO	28	9	1.5	0	0	4	Träb / nicht kalt / Glad-Eiß.
1702	1	4	A	O	28	11	1.25	0	0	5	Etwas kälter / Schnee / Sturm.
1702	1	5	M	O	28	11	1	0	0	6	Trüber Himmel / kalt.
1702	1	5	N	OtS	28	9	1	0	0	7	Mäßiger Schnee / kleiner Haagel.
1702	1	5	A	SOtO	28	10	1	0	0	4	Trüb / kältlich / mäßiger Schnee.
1702	1	6	M	S	28	10	1.5	0	0	4	starck Dauwetter trübe neblichte Lufft.
1702	1	6	N	S	28	9	1.25	0	0	6	Belinde Lufft / wie des Morgens.
1702	1	6	A	StO	28	8	1.25	0	0	3	Noch gelinder / trüber / u. stärcker Dauw.
1702	1	7	M	SW	28	10	1.375	0	0	5	Regen und Dauwetter / gelind.
1702	1	7	N	S	28	9	1.25	0	0	2	Dauwetter ohne Regen /
1702	1	7	A	S	28	11	1.5	0	0	7	In der Nacht bestirnt / aber nicht kalt.
1702	1	8	M	S	28	10	1.5	0	0	3	Dauwetter ohne Regen.
1702	1	8	N	SSO	28	10	1.5	0	0	6	Dauwetter / kältlicher Wind.
1702	1	8	A	S	28	10	1.625	0	0	5	Regen / gegen die Nacht Sturm.
1702	1	9	M	SW	28	10	1.5	0	0	6	Trockne / trübe kältliche Lufft / gegen Mitt. klar
1702	1	9	N	S	28	9	1.75	0	0	5	Trübe Lufft / Dauwetter.
1702	1	9	A	S	28	11	1.75	0	0	3	Trübe Lufft / Dauwetter.
1702	1	10	M	S	28	11	1.25	0	0	2	Trübe Lufft / etwas Regen u. Schlagg.
1702	1	10	N	S	28	9	1.25	0	0	1	Eben so / wie vor Mittag.
1702	1	10	A	SW	28	9	1.25	0	0	0	Dichter Nebel.
1702	1	11	M	SW	28	9	1.375	0	0	2	Nebelicht / Dau-Wetter.
1702	1	11	N	SW	28	8	1.25	0	0	5	Neblicht / Schnee / Schlagg / Regen.
1702	1	11	A	W	28	7	1.5	0	0	7	Neblicht / Dau-Wetter.
1702	1	12	M	NW	28	8	1.5	0	0	6	Nacht-Frost / trübe Lufft ogne Nebel.
1702	1	12	N	NO	28	8	1.375	0	0	6	Trockne Lufft / frostrich.
1702	1	12	A	O	28	8	1.5	0	0	5	Etwas windigt / trübe Lufft.
1702	1	13	M	O	28	9	1.75	0	0	5	Frost / rauhe windige Lufft.
1702	1	13	N	O	28	9	1.5	0	0	5	Sturm mit Schnee vermischt.
1702	1	13	A	O	28	10	1.75	0	0	5	Frost / Sturm / Schnee.
1702	1	14	M	O	28	10	1.75	0	0	3	Stille trübe Lufft / mählige Kält /
1702	1	14	N	O	28	11	1.5	0	0	3	Gelinder Wetter / trüb / Staub-Regen.
1702	1	14	A	O	28	10	1.75	0	0	2	Neblicht / Dauwetter / Staub-Regen.
1702	1	15	M	OtN	28	10	1.75	0	0	4	Neblichte Lufft / Dauwetter.
1702	1	15	N	OtN	28	9	1.75	0	0	3	wie vor Mittag.
1702	1	15	A	OtN	28	11	1.75	0	0	5	wie vor Mittag / Staub-Regen.
1702	1	16	M	O	28	10	1.75	0	0	5	Nacht-Frost / dunckle Lufft / windigt.
1702	1	16	N	O	28	10	1.5	0	0	3	Dunckel / Schnee / Frost.
1702	1	16	A	O	28	11	1.75	0	0	6	Etwas bestirnt / Nacht-Frost.
1702	1	17	M	O	28	11	2	0	0	6	Dunckel / kalte Lufft.
1702	1	17	N	O	28	9	2	0	0	7	wie vor Mittag.
1702	1	17	A	O	28	10	2	0	0	5	Eben wie vor Mittag.
1702	1	18	M	NO	28	10	2.25	0	0	7	Trübe Lufft / ziemlicher Frost.
1702	1	18	N	NO	28	10	2	0	0	8	So wie des Morgens.
1702	1	18	A	NO	28	11	2.25	0	0	9	Einerlen Gewitter.
1702	1	19	M	NO	28	11	2.125	0	0	9	Reiff kalt / windigt / Nebel.
1702	1	19	N	O	28	9	2.125	0	0	10	Klar / Sonnenschein / Frost.
1702	1	19	A	O	28	10	2.25	0	0	9	klar bestirnt / ziemlicher Frost.
1702	1	20	M	SO	28	10	2	0	0	10	Klar Wetter / Frost.
1702	1	20	N	O	28	10	1.5	0	0	12	Eben auch also.
1702	1	20	A	O	28	10	1.25	0	0	13	So wie den Tag über / bestirnt.
1702	1	21	M	OSO	28	11	1.25	0	0	12	Starcke Morgenröth / kalter scharffer Wind.
1702	1	21	N	SO	28	10	1.125	0	0	11	trübere Lufft / gelindre Kält.
1702	1	21	A	S	28	11	2.25	0	0	10	halb bestirnt / etwas trüb / lindre Kält.
1702	1	22	M	SSW	29	0	1	0	0	11	dunckel / gelind / dau-Wetter.
1702	1	22	N	SW	29	0	1	0	0	10	Gleich wie vor Mittag.
1702	1	22	A	SW	29	0	1.25	0	0	9	wie vor Mittag.
1702	1	23	M	NO	29	0	1	0	0	12	Gelind / dunckel Wetter.
1702	1	23	N	NO	29	0	1.75	0	0	14	Staub-Regen / Glad-Eiß / Schnee / schlag.
1702	1	23	A	N	29	1	1.75	0	0	15	Dunckel / neblicht / Dau-Wetter.
1702	1	24	M	S	29	1	0.5	0	0	16	Nebel / gegen Mittag starcker Regen.
1702	1	24	N	SW	29	1	0.5	0	0	15	Bewölck / Sturm / Sonnenblicke Regen.
1702	1	24	A	SW	29	2	0.5	0	0	17	still / trüb / gelind Dauwetter / in d' Nacht.
1702	1	25	M	SW	29	2	0.75	0	0	17	Sonnenblicke mit Wolcken vermischt.
1702	1	25	N	SW	29	1	0.5	0	0	19	dunckel / warm gelind Wetter.
1702	1	25	A	SW	29	2	0.5	0	0	21	Abendröth / gelind / Sturm und Regen.
1702	1	26	M	WtS	29	2	0.5	0	0	21	Schnee / Hagel Schlagg / Sonnenblicke.
1702	1	26	N	W	29	2	0.5	0	0	22	Warme trübe stille Lufft.
1702	1	26	A	W	29	3	0.5	0	0	24	wie nach mittag. In der Nacht bestirnt.
1702	1	27	M	SO	29	3	0.5	0	0	23	Nacht-Frost / Morgenröth / trüb / Dau-Wetter.
1702	1	27	N	S	29	3	0.5	0	0	22	Regen / Schlagg.
1702	1	27	A	S	29	4	0.5	0	0	21	Trüb / ganz gelind Wetter.
1702	1	28	M	WSW	29	4	0.25	0	0	24	trüb / gelind Wetter / stinckender Nebel.
1702	1	28	N	WSW	29	4	0.25	0	0	26	wie vor Mittag. Staub-Regen.
1702	1	28	A	WSW	29	5	0.375	0	0	27	Eben wie nach Mittag.
1702	1	29	M	WSW	29	5	0.5	0	0	25	Etwas klar / bald darauff dunckel.
1702	1	29	N	WSW	29	4	0.5	0	0	23	Neblicht
1702	1	29	A	WSW	29	6	0.5	0	0	26	Neblicht.
1702	1	30	M	W	29	6	0.75	0	0	25	Nebel.
1702	1	30	N	W	29	5	0.75	0	0	26	Nebel / Sturm.
1702	1	30	A	W	29	6	0.75	0	0	28	Nebel / Sturm.
1702	1	31	M	W	29	6	0.75	0	0	28	Kühl / Nebelicht.
1702	1	31	N	SW	29	6	0.5	0	0	28	Kühl / Sturmicht.
1702	1	31	A	S	29	6	0.75	0	0	30	dunckel / kühl / stürmicht.
1702	2	1	M	S	29	8	0.75	0	0	30	Etwas Frost / trübe / trockene Lufft.
1702	2	1	N	S	29	9	0.75	0	0	30	Sonnenblicke / bald trüb / kleiner Regen.
1702	2	1	A	SW	29	8	0.75	0	0	31	Trüb / neblicht / Sturm / Regen.
1702	2	2	M	W	29	8	0.5	0	0	28	Nebel / gewaltiger Sturm.
1702	2	2	N	W	29	7	0.75	0	0	29	Frost / rauhe windige Lufft.
1702	2	2	A	W	29	7	0.5	0	0	30	Starcker Regen / gewaltiger Sturm.
1702	2	3	M	W	29	6	0.25	0	0	28	Bewölck / Sonnenblicke / reißender sturm.
1702	2	3	N	W	29	5	0	1.5	0	27	Trockne milde Lufft / ohne Sturm.
1702	2	3	A	W	29	4	0	2	0	26	Stille Lufft / zimlicher Regen.
1702	2	4	M	W	29	8	0	0.625	0	26	Starcker Sturm / Regen Wetter.
1702	2	4	N	W	29	9	0	0.2	0	25	Starcker Sturm / trüb.
1702	2	4	A	W	29	7	0	1.5	0	23	Sturm / bewölckt / theils bestirnt.
1702	2	5	M	S	29	6	0	0.5	0	18	starcke Morgenröth / windig / Sonnenbl.
1702	2	5	N	SSW	29	5	0	0.25	0	21	Trüb / gelind Wetter / Regen.
1702	2	5	A	SW	29	5	0	0.125	0	22	bestirnt mit lauffenden Wolcken / gelind.
1702	2	6	M	W	29	6	0	1.5	0	19	Trübe / rauhe sturmichte Lufft.
1702	2	6	N	SW	29	6	0	1.5	0	20	Sonnenblick / sturm / Nebel / Regen.
1702	2	6	A	SW	29	7	0	1.75	0	21	dicke / neblichte / rauhe Lufft / staub-Regen.
1702	2	7	M	SW	29	7	0	2	0	21	Trüb / gelind / windigt.
1702	2	7	N	SW	29	5	0	1	0	19	Wärmlicht / Wind.
1702	2	7	A	SW	29	6	0	2	0	18	wie vor Mittag / gegen die Nacht Regen.
1702	2	8	M	SW	29	6	0	1.5	0	22	Dick / trüb / gelind Wetter.
1702	2	8	N	W	29	6	0	1	0	21	Sonnenschein.
1702	2	8	A	W	29	6	0	1.5	0	20	Abendroth / kältere Lufft.
1702	2	9	M	SW	29	5	0	1.75	0	20	Windige / dunckele Lufft.
1702	2	9	N	SW	29	5	0	1.75	0	19	Dunckel Wetter / Sonnenblicke.
1702	2	9	A	SW	29	5	0	1.75	0	18	windigt / bewolckt. Nacht-sturm.
1702	2	10	M	WSW	29	5	0	1	0	21	windicht / Sonnenblicke.
1702	2	10	N	WSW	29	4	0	1.5	0	22	sturmicht / klar.
1702	2	10	A	WSW	29	5	0	2	0	23	bestirnt / fliegende Wolcken / reißender Sturm.
1702	2	11	M	WSW	29	6	0	2	0	22	Morgenröth / Sonnensch. / mäßiger sturm / Regen.
1702	2	11	N	WSW	29	5	0	2	0	24	wie vor Mittag.
1702	2	11	A	WSW	29	4	0	1	0	25	bestirnt / fliegend Bewölckt / Sturm.
1702	2	12	M	WNW	29	3	0	1	0	28	heller Sonnenschein / windigt.
1702	2	12	N	W	29	3	0	1	0	27	recht klar / angenehme Frühlings Lufft.
1702	2	12	A	W	29	4	0	1.5	0	30	heller Voll-Mond / neblicht / gelind.
1702	2	13	M	SW	29	4	0	0.5	0	31	Nebel / Regen.
1702	2	13	N	SW	29	3	0	0	0	26	Trübe / naße / gelinde Lufft.
1702	2	13	A	WtS	29	3	0	0	0	24	Trübe gelinde Lufft.
1702	2	14	M	SW	29	3	0	1.25	0	25	Heller Sonnenschein / gelind.
1702	2	14	N	SW	29	3	0	1	0	28	wie vor Mittag.
1702	2	14	A	S	29	1	0	0	0	27	Regen / heller Mondsch. still / gelind.
1702	2	15	M	SO	28	11	0	0.25	0	26	Morgenröth / windigt / heller Sonnensch.
1702	2	15	N	OtS	28	8	0	1	0	23	helle / stille warme Lufft.
1702	2	15	A	OtS	28	9	0	0.75	0	21	bestirnter heller Himmel.
1702	2	16	M	SO	28	8	0	0.75	0	22	Angenehmer Sonnensch. Frühlings Lufft.
1702	2	16	N	S	28	9	0	0.75	0	24	warm Wetter / Sonnenschein.
1702	2	16	A	S	28	10	0	0.5	0	26	bestirnt / hernach beschworckt / warm.
1702	2	17	M	NO	28	11	0	0.25	0	25	Unbeständiger Wind / Regen.
1702	2	17	N	O	29	0	0	0	0	23	Trübe warme Lufft / Regen.
1702	2	17	A	O	29	0	0	0.125	0	24	Regen.
1702	2	18	M	O	28	11	0	0.25	0	24	Trübe / dunckle Lufft.
1702	2	18	N	O	28	11	0	0.5	0	23	Trübe dunckle Lufft.
1702	2	18	A	SO	28	11	0	0.375	0	21	halb bestirnt / sturm / und Regen.
1702	2	19	M	OSO	28	11	0	0.375	0	19	gelind und klar / hernach trüb Wetter.
1702	2	19	N	SO	28	11	0	0.25	0	20	Trüb gelind Wetter.
1702	2	19	A	O	28	11	0	0.25	0	18	wie nach mittag. starcker Nacht-sturm.
1702	2	20	M	SO	28	11	0	0.25	0	17	Morgenroth / aber hernach klar gelind Wetter.
1702	2	20	N	SO	29	0	0	0.125	0	16	Sonnenschein / gelind.
1702	2	20	A	SO	29	1	0	0.125	0	15	Abendroth / bewolckt / warm.
1702	2	21	M	NW	29	2	0.25	0	0	15	Bewölck / kalt / gegen Mittag Regen.
1702	2	21	N	NW	29	2	0.25	0	0	14	Schnee / Schlagg / Regen.
1702	2	21	A	NW	29	2	0.25	0	0	13	Trüb / beschworckt.
1702	2	22	M	NO	29	2	0.125	0	0	12	Trüb / dunckel / frostricht Wetter,
1702	2	22	N	O	29	1	0	0	0	13	Wie vor Mittag.
1702	2	22	A	OSO	29	1	0	0	0	11	Eben auch solch Wetter.
1702	2	23	M	NO	29	1	0.125	0	0	12	Dunckele Lufft / stinckender Nebel.
1702	2	23	N	NW	29	1	0.1	0	0	13	Dunckel / gelind Wetter.
1702	2	23	A	NW	29	1	0.1	0	0	14	Dunckel / gelind Wetter.
1702	2	24	M	NO	29	2	0.25	0	0	14	Trüb / frostrich Wetter.
1702	2	24	N	NO	29	2	0.375	0	0	15	Trüb / dunckel Wetter / kalter Wind.
1702	2	24	A	NO	29	3	0.375	0	0	16	Wie nach Mittag.
1702	2	25	M	O	29	4	0.25	0	0	16	Trüb / neblich / unfreundlich.
1702	2	25	N	SO	29	4	0.375	0	0	14	Eben also.
1702	2	25	A	SO	29	4	0.375	0	0	14	Neblicht / Staub-Regen.
1702	2	26	M	SO	29	3	0.25	0	0	15	Morgenröth / hernach trüb.
1702	2	26	N	S	29	1	0.125	0	0	17	Theils klahr & theils bewolckt / Sturm.
1702	2	26	A	S	29	0	0	0	0	18	Halb bestirnt / Sturm / Regen.
1702	2	27	M	SSW	28	9	0	0.5	0	20	Dunckel / sturmicht / Regenhafft.
1702	2	27	N	SW	28	7	0	8	0	19	Finstre Lufft / starcker Regen und Sturm.
1702	2	27	A	W	28	6	0	0.375	0	17	Trüb / starcker Sturm / ohne Regen.
1702	2	28	M	SW	28	6	0	0.625	0	20	klar / dunckel / Schnee / sturm / hagel / schlag.
1702	2	28	N	SW	28	6	0	0.5	0	18	Sonnensch. etwas Schnee / sturm / hagel / schlag.
1702	2	28	A	SW	28	7	0	0.625	0	12	Sturm / schnee / Stauwaßer im Pregel.
1702	3	1	M	S	28	9	0.125	0	0	8	Morgenröth / klar / Wolcken / etwas Frost.
1702	3	1	N	W	28	11	0	0	0	8	Sonnenschein / windicht / etwas Schnee.
1702	3	1	A	W	29	0	0.125	0	0	8	bestirnt / still / in der Nacht Frost.
1702	3	2	M	W	28	11	1	0	0	5	Morgenröth / Bewölckt / Sonnenschein.
1702	3	2	N	S	28	9	0	0.625	11	0	Starcker Wind / dicker Schnee.
1702	3	2	A	S	28	9	0	0.25	10	0	hell bestirnt / kühler Wind.
1702	3	3	M	S	28	7	0	0.5	9	0	Dunckle dicke Lufft / Schnee / Schlagg.
1702	3	3	N	SW	28	6	0	0.375	8	0	meistens StaubRegen / Schlagg.
1702	3	3	A	W	28	6	0	0.625	7	0	bestirnter Himmel / in d' Nacht Schnee.
1702	3	4	M	SW	28	6	0	0.625	5	0	Dunckle rauhe Lufft / Schnee / Schnagg.
1702	3	4	N	WSW	28	7	0	0.5	5	0	Sonnenblicke und Schnee abgewechselt.
1702	3	4	A	WSW	28	8	0	0.25	5	0	halb bestirnt / halb bewolckt / Sturm.
1702	3	5	M	SW	28	11	0.125	0	4	0	Sonnenschein / bewölckt / starcker Wind.
1702	3	5	N	SW	28	11	0.25	0	3	0	Fliegende Wolcken / meistens Sonnensch.
1702	3	5	A	SSO	29	1	0.25	0	3	0	Schnee / Schlagg.
1702	3	6	M	SW	29	2	0.5	0	3	0	Morgenröth / Schlagg. gegen Mitt. klar
1702	3	6	N	NW	29	3	0.625	0	3	0	Starcker Hagel Schlagg / Sonnensch.
1702	3	6	A	W	29	4	0.75	0	3	0	heller Mondsch. Bestirnt / Nachtfrost.
1702	3	7	M	SSW	29	5	0.875	0	3	0	hell / daben kühl und windig.
1702	3	7	N	S	29	5	0.75	0	3	0	heiter schön Vorjahrs-Wetter.
1702	3	7	A	SO	29	4	0.5	0	1	0	heller Mondschein / klar bestirnt.
1702	3	8	M	SO	29	2	0.375	0	1	0	Trübe / dunckle Lufft / Schnee Bebrockel.
1702	3	8	N	S	29	2	0.375	0	1	0	dunckle räuchrige Lufft.
1702	3	8	A	S	29	2	0.375	0	1	0	Nebel / Schlagg.
1702	3	9	M	W	29	3	0.625	0	1	0	Nebel / darauff heller Sonnensch. und Frost.
1702	3	9	N	W	29	3	0.625	0	1	0	heller Sonnenschein.
1702	3	9	A	W	29	4	0.75	0	1	0	klares helles Wetter. In d' Nacht Reiff
1702	3	10	M	S	29	4	0.625	0	1	0	heller Sonnen-Schein.
1702	3	10	N	S	29	3	0.75	0	1	0	erst klar / hernach bewolckt / kleiner Regen und Frost
1702	3	10	A	S	29	2	0.125	0	1	0	beschworckt / Regen / gelind. Nacht-Regen.
1702	3	11	M	S	28	10	0	0.25	1	1	Trüb Regenwetter / Sturm
1702	3	11	N	S	28	8	0	0.625	0	5	Sturm beschworckt / Regen Sonnenschein
1702	3	11	A	SW	28	8	0	0.5	0	5	Sturm / trüb / Mondblick / Schnee.
1702	3	12	M	SW	28	7	0	0.5	0	4	sturm / sonnenblicke / bewolckt.
1702	3	12	N	SSW	28	7	0	0.625	0	4	Sturm / Schnee / Schlagg.
1702	3	12	A	SSW	28	7	0	0.625	0	4	Sturm / Schnee / Schlagg.
1702	3	13	M	SW	28	7	0	0.5	0	4	sturm / trüb / Schnee / Schlagg.
1702	3	13	N	W	28	8	0	0.375	0	4	Schnee / Schlagg / trübe Lufft / Sonnenbl.
1702	3	13	A	W	28	8	0	0.25	0	4	stille Lufft / bewolckt / starcker Nachtfrost.
1702	3	14	M	WNW	28	9	0	0	0	4	Kühl / bewolckt / schnee / sonnenschein.
1702	3	14	N	NW	28	11	0.125	0	0	3	sturm / starcker schnee / schlag / sonnenbl.
1702	3	14	A	NW	29	0	0.125	0	0	3	sturm / beschworckt. In der nacht hell.
1702	3	15	M	NW	29	0	0.25	0	0	4	dicker schnee / und haagel / Sonnenblicke.
1702	3	15	N	NW	29	1	0.375	0	0	3	Trüb / schnee / windig.
1702	3	15	A	NW	29	2	0.375	0	0	2	Trüb / auff die Nacht schnee.
1702	3	16	M	NW	29	3	0.625	0	0	2	Trüb / schnee / sonnenblicke.
1702	3	16	N	NW	29	4	0.75	0	0	1	theils klar / theils fliegende trübe Wolcken
1702	3	16	A	NW	29	4	0.75	0	0	0	Dunckel / Nachtfrost.
1702	3	17	M	NNO	29	3	0.625	0	0	0	sturm / dunckel.
1702	3	17	N	N	29	4	0.75	0	1	0	Trübe kühle Lufft.
1702	3	17	A	NNW	29	4	0.875	0	3	0	Windig / halb auffgeklart / Frost.
1702	3	18	M	N	29	4	0.875	0	3	0	Frost / daben trüb und sehr dunckel.
1702	3	18	N	NW	29	4	0.75	0	5	0	Dunckel / zuweiten sonnenblicke.
1702	3	18	A	NW	29	5	0.875	0	4	0	Beschworckt.
1702	3	19	M	SO	29	6	1	0	4	0	Dicker Nebel.
1702	3	19	N	SW	29	6	1	0	4	0	Nebel / staub-Regen.
1702	3	19	A	SW	29	6	1	0	4	0	Nebel.
1702	3	20	M	W	29	7	1	0	4	0	Nebel.
1702	3	20	N	NW	29	6	0.875	0	3	0	Trüb / durchbrechende sonnenbl. Frühlings Lufft.
1702	3	20	A	NNW	29	7	1	0	3	0	starck Abendroth / starck bestirnter Himmel
1702	3	21	M	NW	29	8	1.375	0	4	0	starcker Nebel.
1702	3	21	N	W	29	8	1.25	0	4	0	Nebel
1702	3	21	A	W	29	9	1.125	0	4	0	dunckel Wett. Tag und Nacht gleich.
1702	3	22	M	W	29	8	1	0	2	0	Nebel / darauff heller Sonnenschein.
1702	3	22	N	W	29	8	0.75	0	0	1	Schön klar warm Vorjahrs Wetter.
1702	3	22	A	WSW	29	7	1	0	0	2	Hell bestirnt / stille gelinde Lufft.
1702	3	23	M	N	29	7	0.875	0	0	2	Hell angenehmes Frühlings- Wetter.
1702	3	23	N	N	29	5	0	0.25	2	0	Heller warmer Sonnenschein.
1702	3	23	A	NNW	29	7	0.75	0	8	0	Bestirnter Himmel.
1702	3	24	M	W	29	4	0.5	0	9	0	Sonnenschein / fliegende Wolcken / kalter Wind.
1702	3	24	N	NW	29	3	0.25	0	9	0	Kalter Wind / sonnenschein.
1702	3	24	A	NW	29	4	0.375	0	9	0	Windig / hell bestirnt.
1702	3	25	M	NW	29	3	0.25	0	10	0	Kalt / sturmig / fliegende Wolcke / sonnenbl.
1702	3	25	N	NW	29	3	0.25	0	11	0	Sturm / sonnenschein / Bewolckt.
1702	3	25	A	NW	29	4	0.375	0	11	0	Windig / hell / bestirnter Himmel.
1702	3	26	M	WSW	29	1	0	0	11	0	sturmigt / trüb / sonnenblicke.
1702	3	26	N	NW	29	1	0	0.125	11	0	So wie vor Mittag.
1702	3	26	A	NW	29	1	0	0	11	0	Gelinder sturm / Bewolckt / Sternbl.
1702	3	27	M	NW	28	11	0	0	12	0	Trübe sturmige Lufft / sonnenschein.
1702	3	27	N	NW	28	11	0	0.125	15	0	sturm / sonnenschein / fliegend Bewölckt.
1702	3	27	A	NW	29	0	0.125	0	26	0	Schworcken-sternblicke / sturm.
1702	3	28	M	NW	29	1	0.125	1	30	0	Hell / kühl.
1702	3	28	N	N	29	0	0	0	31	0	Hell.
1702	3	28	A	N	29	2	0.125	0	34	0	Klar bestirnt / kühl.
1702	3	29	M	S	29	3	0.375	0	33	0	Nebel / hernach Sonnenschein.
1702	3	29	N	SW	29	3	0	0	34	0	Dunckel warm Wetter / etwas windig.
1702	3	29	A	SW	29	3	0.125	0	31	0	Trüber beschworckter Himmel.
1702	3	30	M	SW	29	2	0.125	0	28	0	Hell / klar / mild Wetter / sonnenschein.
1702	3	30	N	SW	28	11	0	0.5	25	0	sturm / trüb / beschworckt.
1702	3	30	A	NNW	29	1	0.125	0	25	0	sturm / hell bestirnt.
1702	3	31	M	NW	29	4	0.5	0	25	0	Kalter Wind / sturm hagel / sonnenbl.
1702	3	31	N	NW	29	6	0.75	0	35	0	Rauher Wind / beschworckt / sonnenbl.
1702	3	31	A	NW	29	7	1	0	46	0	Windig hell bestirnt / Nachtfrost.
1702	4	1	M	NNW	29	9	1	0	46	0	Angenehm Frühlingswetter / sonnenschein wind.
1702	4	1	N	WSW	29	7	0.75	0	52	0	Wie vor mittag.
1702	4	1	A	WSW	29	6	0.75	0	60	0	Abendroth / hell bestirnt / unsre mdl. kalter
1702	4	2	M	SW	29	5	0.5	0	61	0	Heller Sonnenschein.
1702	4	2	N	SW	29	3	0.75	0	61	0	Heitrer Himmel / windig.
1702	4	2	A	SW	29	1	0	0.125	61	0	Hell bestirnt.
1702	4	3	M	W	28	11	0	0.25	60	0	Sturm / beschworckt.
1702	4	3	N	W	28	11	0	0.75	61	0	starker sturm. Regen. Abend warmer Reg.
1702	4	3	A	W	28	11	0	0.25	61	0	Beschworckt / windig. Nacht Regen.
1702	4	4	M	SW	28	10	0	0.375	55	0	Windig / Regen.
1702	4	4	N	SW	28	9	0	0.5	45	0	starcker Sturm mit Regen gemischt.
1702	4	4	A	SW	28	8	0	0.75	38	0	Windig / beschworcken.
1702	4	5	M	W	28	4	0	1.25	35	0	Hefftiger Sturm / hagel / Regen / schlagg.
1702	4	5	N	S	28	3	0	1.375	38	0	Sturm / hagel / Regen / Sonnenschein.
1702	4	5	A	S	28	3	0	1.25	38	0	Dunckele Lufft / starcker Sturm.
1702	4	6	M	WSW	28	6	0	NA	38	0	starcker Sturm / trübe dunckele Lufft.
1702	4	6	N	SW	28	7	0	0.5	42	0	Windig / trüb / Staub-Regen.
1702	4	6	A	SSW	28	9	0	0.375	45	0	Still / bestirnt / in der Nacht Frost.
1702	4	7	M	SW	28	10	0	0	44	0	Heller Sonnenschein.
1702	4	7	N	N	28	11	0	0.25	45	0	Theils klar / Staub-Regen.
1702	4	7	A	NW	28	9	0	0.25	44	0	sturm / schnee / schlag / Kreiselwind / schnee.
1702	4	8	M	NO	28	7	0	0.375	45	0	Sturm / trüb / schlagg.
1702	4	8	N	S	28	9	0	0.25	45	0	Hefftiger sturm / schlagg. Hohes Wasser im Pregel.
1702	4	8	A	S	29	1	0.375	0	44	0	Windig / bewolckt / frost.
1702	4	9	M	NO	29	3	0.625	0	45	0	Trübe / windige kalte Lufft.
1702	4	9	N	O	29	3	0.25	0	43	0	Trüb / angenehm warm stiller Regen.
1702	4	9	A	NO	29	3	0.25	0	40	0	Halb und halb bestirnt / Mondschein.
1702	4	10	M	NO	29	2	0.125	0	35	0	Windig / trüb / warme Lufft.
1702	4	10	N	ONO	29	1	0.25	0	19	0	Warm / trüb / hefftger Sturm.
1702	4	10	A	NO	29	1	0	0.125	11	0	Heller Mondschein / starcker wind / warm
1702	4	11	M	NO	29	1	0	NA	11	0	Trübe / windige doch warme Lufft.
1702	4	11	N	NO	29	1	0	0.25	8	0	Trübe Lufft mit sonnenschein gemengt.
1702	4	11	A	NO	29	2	0	0	9	0	Kalter Wind / fliegende Wolcken.
1702	4	12	M	NO	29	4	0	0	9	0	Klarer Sonnenschein.
1702	4	12	N	NNO	29	3	0	0	9	0	Warmer heller Sonnenschein. Regen-Bogen.
1702	4	12	A	NNO	29	3	0	0.125	9	0	Windig Klitz / Donner / Regen / bestirnt.
1702	4	13	M	ONO	29	1	0	0.25	8	0	Heitre Lufft / heller Sonnenschein.
1702	4	13	N	N	29	0	0	0.5	8	0	Trüb / blitz / donner / Regen / still / sonnensch.
1702	4	13	A	N	29	0	0	0.5	11	0	Bestirnt / sanffter warmer Wind.
1702	4	14	M	NO	29	0	0	0.625	9	0	Neblicht / hernach Sonnenschein.
1702	4	14	N	NNO	28	11	0	0.625	8	0	Sonnenschein / warmer Regen / Donner.
1702	4	14	A	N	28	11	0	0.5	9	0	Regen / stille Lufft.
1702	4	15	M	N	28	11	0	0.5	12	0	Rauchrig Wetter / Regen.
1702	4	15	N	SW	28	9	0	0.75	12	0	Warmer Sonnenschein.
1702	4	15	A	SO	28	10	0	0.625	12	0	Gelinde klare angenehme Lufft.
1702	4	16	M	O	28	10	0	0.625	15	0	Kühl / Bewolckt mit Sonnensch. gemischt.
1702	4	16	N	SO	28	8	0	1.25	18	0	Hell warm angenehm Wetter.
1702	4	16	A	S	28	9	0	0.875	23	0	Regen.
1702	4	17	M	W	28	10	0	0.5	13	0	Hell Wetter / kühle Lufft.
1702	4	17	N	W	28	11	0	0.5	20	0	Kühler Wind / heller Sonnenschein.
1702	4	17	A	W	28	11	0	0.5	28	0	Kühle Lufft / hell bestirnt.
1702	4	18	M	WSW	28	11	0	0.25	27	0	Kühle Lufft / heller Himmel.
1702	4	18	N	W	28	11	0	0.25	30	0	Heller Sonnenschein / kühler Wind.
1702	4	18	A	WSW	29	0	0	0.25	35	0	Abendroth / klarer Himmel.
1702	4	19	M	SW	29	1	0	0.125	36	0	Heller Sonnensch. temperirte Lufft.
1702	4	19	N	SW	29	1	0	0.5	45	0	Temperirte Lufft / heller Sonnenschein
1702	4	19	A	WtW	29	1	0	0.375	55	0	Hell bestirnt.
1702	4	20	M	NW	29	0	0	0.375	54	0	Trüb / kühl Wetter / Regen.
1702	4	20	N	W	29	0	0	0.25	54	0	Etwas Hagel / Sonnenblicke Bewölckt.
1702	4	20	A	W	29	0	0	0.125	54	0	Hell bestirnt / kühl.
1702	4	21	M	StW	29	0	0	0.125	54	0	Trübe kühle Lufft / kleiner Regen.
1702	4	21	N	O	29	0	0	0.5	54	0	Trübes regenhaftes Wetter.
1702	4	21	A	OtS	29	0	0	0.25	54	0	beschworckt / Regen. In d' Nacht Reiff.
1702	4	22	M	SO	28	11	0	0.5	54	0	Nebel / kühl. Gegen mittag sonnensch.
1702	4	22	N	N	28	11	0	0.5	54	0	beschworckt / mehrth. sanffter Regen.
1702	4	22	A	NO	28	10	0	0.375	54	0	Trüb / kleiner stiller Regen.
1702	4	23	M	NW	28	11	0	0.25	54	0	Kühler wind / fliegende wolcken / sonnensch.
1702	4	23	N	N	28	11	0	0.5	54	0	heller sonnensch. kalter Wind.
1702	4	23	A	NO	29	1	0	0	54	0	Kühl / klar bestirnt / Nacht-Reiff.
1702	4	24	M	OtS	29	2	0.33	0	54	0	Kühl / still / klar.
1702	4	24	N	O	29	2	0	0.25	54	0	windig / bewolckt / sonnenblicke / schwuhl.
1702	4	24	A	OtN	29	2	0	0.125	54	0	still / warm / beschworckt. Nacht-Regen.
1702	4	25	M	O	29	1	0	0.25	54	0	windig / warmer sanffter Regen.
1702	4	25	N	S	28	11	0	0.5	54	0	windig / warmer ärckerer Regen.
1702	4	25	A	S	28	11	0	0.5	54	0	Beschworckt / zum Regen geneigt.
1702	4	26	M	S	28	10	0	0.625	51	0	Sonnensch. hernach trüb / kühl / regenhafft.
1702	4	26	N	SW	28	10	0	0.75	51	0	Trüb / kühl / Regen.
1702	4	26	A	SW	28	9	0	0.625	51	0	Sturm / Regen / Schlagg / kalt.
1702	4	27	M	NW	28	10	0	0.5	49	0	Kalt / sturmicht / Regen.
1702	4	27	N	NW	28	11	0	0.375	48	0	Trüb / windig / Staub-Regen.
1702	4	27	A	NNW	29	0	0	0.125	48	0	Kühl / beschworckt.
1702	4	28	M	NNW	29	1	0	0.125	48	0	Kühl beschworckt.
1702	4	28	N	NW	29	1	0	0	48	0	Kalt / beschworckt / weniger Regen.
1702	4	28	A	NW	29	1	0	0	48	0	Kühl / beschworckt / Regen / kalt.
1702	4	29	M	WNW	29	1	0	0	48	0	Kühl / trüb / gegen Mittag klar.
1702	4	29	N	NW	29	2	0	0	48	0	Trüb / beschworckt / kühl.
1702	4	29	A	N	29	2	0	0	49	0	Kalt / unfreundl. dunckle Lufft.
1702	4	30	M	NO	29	2	0	0	49	0	widerliche dirchbrigende Lufft trüb / hell.
1702	4	30	N	NO	29	1	0	0.25	49	0	Kalter Wind Sonnenschein.
1702	4	30	A	NO	29	1	0	0.125	49	0	Kalte Lufft / halb und halb bestirnt.
1702	5	1	M	NO	29	0	0	0.125	49	0	Kalte windige Lufft / trüb hernach hell.
1702	5	1	N	NO	29	0	0	0.5	49	0	Helle / gelindere Lufft.
1702	5	1	A	NO	28	11	0	0.5	49	0	staub-Regen / trüber Himmel / sturm.
1702	5	2	M	NO	28	10	0	0.625	38	0	sturmicht / trübe regnichte Lufft.
1702	5	2	N	NNO	28	10	0	0.125	33	0	Dunckel / naß / kalte Lufft.
1702	5	2	A	NNO	28	10	0	0.5	30	0	Beschworckt / windig.
1702	5	3	M	NO	28	11	0	0.375	30	0	sturm / dick bewolckt / gegen Mittag klar.
1702	5	3	N	NO	28	11	0	0.625	30	0	heller sonnenschein / kühle Lufft.
1702	5	3	A	NO	29	0	0	0.375	32	0	hell bestirnt / kühler Wind.
1702	5	4	M	NO	29	0	0	0.125	36	0	heitrer Himmel / sonnensch. etwas kühl.
1702	5	4	N	N	29	0	0	0.375	45	0	heller sonnenschein / kühl.
1702	5	4	A	NW	29	1	0	0.25	51	0	Kühl / heller Himmel.
1702	5	5	M	NO	29	1	0	0.125	50	0	Kühl / doch angenehm Vorjahrswetter.
1702	5	5	N	N	29	1	0	0.75	60	0	Wie vor Mittag.
1702	5	5	A	NO	29	1	0	0.25	90	0	Kühle Lufft / heller Himmel.
1702	5	6	M	NO	28	11	0	0.25	95	0	Gelindre Lufft / heller sonnenschein.
1702	5	6	N	NO	28	11	0	0.5	110	0	warm / heller reiner Himmel.
1702	5	6	A	NO	29	1	0	0.5	105	0	Klare stille angenehme Lufft.
1702	5	7	M	WNW	29	0	0	0.375	105	0	Klare kühle Lufft / fliegende Wolcken.
1702	5	7	N	WNW	29	1	0	0.75	105	0	Kalter Wind / sonnenschein.
1702	5	7	A	NW	29	2	0	0.25	107	0	Recht kalter starcker Wind / klar.
1702	5	8	M	W	29	3	0	0.125	108	0	Kühle Lufft / heitrer Himmel.
1702	5	8	N	N	29	3	0	0.25	108	0	Kühl / theils bewolckt.
1702	5	8	A	NW	29	3	0	0	108	0	Recht kühl / daben hell / Nacht-Frost.
1702	5	9	M	NW	29	3	0	0	108	0	Anfangs klar u. kalt / dann trüb u. Regen
1702	5	9	N	N	29	3	0	0	108	0	Trüb / gegen Abend auffgeklart / kühl /
1702	5	9	A	NW	29	3	0	0	108	0	Kalte klare Lufft.
1702	5	10	M	NW	29	3	0.125	0	108	0	Theils klar / theils trüb / staub-regen / kalt.
1702	5	10	N	NW	29	1	0	0.5	108	0	Gelinder klar Dauwetter.
1702	5	10	A	W	29	2	0	0.125	108	0	Kühl und klar.
1702	5	11	M	W	29	1	0	0.375	108	0	Kühler Wind / trüb / hell / flieg. wolken.
1702	5	11	N	NW	28	11	0	1	108	0	Heller Sonnenschein / daben windig.
1702	5	11	A	NW	29	0	0	0.5	108	0	Heller Voll-Mond / gelindre Lufft / winde.
1702	5	12	M	NW	29	1	0	0.125	104	0	Kühle Lufft / meistentheils klar.
1702	5	12	N	W	28	11	0	1.5	98	0	Stille Lufft / angenehm klar Wetter.
1702	5	12	A	S	28	11	0	0.75	98	0	Recht warm / schön Vorjahrs-Wetter.
1702	5	13	M	SO	28	11	0	0.75	98	0	Warmer Sonnensch. starcker Wind.
1702	5	13	N	S	28	11	0	1.75	98	0	Windig / angenehm warm und hell.
1702	5	13	A	S	28	11	0	1.25	98	0	stillere Lufft / kleiuer warmer Regen / bew.
1702	5	14	M	NO	28	11	0	1	99	0	Still / angenehm / klar / gelind Wetter.
1702	5	14	N	W	28	11	0	1.5	99	0	Windigt / beschworckt / fruchtbahr. Regen
1702	5	14	A	N	29	2	0	0.625	97	0	Kühl / trüb / beschworckt / etwas Regen.
1702	5	15	M	WtW	29	3	0	0.25	90	0	Kühl / hell / klar Wetter.
1702	5	15	N	N	29	3	0	0.5	91	0	Wie vor mittag.
1702	5	15	A	N	29	3	0	0.25	90	0	Kühle Lufft / heller Himmel.
1702	5	16	M	NO	29	4	0	0.25	92	0	Kühle klare Lufft.
1702	5	16	N	N	29	3	0	0.5	93	0	Klar / etwas kühl.
1702	5	16	A	N	29	4	0	0.5	93	0	Wie nach Mittag.
1702	5	17	M	ONO	29	5	0	0.25	93	0	Kühl / Sonnenschein / Bewölckt.
1702	5	17	N	ONO	29	4	0	1	93	0	Warmer heller Sonnensch. Bewölckt.
1702	5	17	A	NO	29	4	0	0.5	96	0	Temperirte Lufft / heller Himmel.
1702	5	18	M	NO	29	4	0	0.25	96	0	Kühl / windigt / daben heller Himmel.
1702	5	18	N	NO	29	3	0	1	100	0	Warme helle Lufft / etwas windigt.
1702	5	18	A	NO	29	3	0	0.5	110	0	Warme stille helle Lufft.
1702	5	19	M	NO	29	4	0	0.25	112	0	Kühl / heller Himmel.
1702	5	19	N	N	29	3	0	1	117	4	Warme / helle Lufft / windigt.
1702	5	19	A	NtW	29	3	0	0.5	117	0	Windigt / kühl / heller Himmel.
1702	5	20	M	NW	29	2	0	0.5	115	0	Freundlich / hell klar Wetter.
1702	5	20	N	NW	29	1	0	1.5	117	0	Klare Lufft / warmer sonnensch. Wind.
1702	5	20	A	NW	29	2	0	0.75	116	0	Lufftig / temperirte Wärm / klarer Himmel.
1702	5	21	M	N	29	3	0	0.5	116	0	kühl / haben hell klar Wetter.
1702	5	21	N	N	29	2	0	1.5	117	0	Schwuhl Wetter / beschworten.
1702	5	21	A	N	29	3	0	0.75	117	0	Trüb / beschworcken / warm.
1702	5	22	M	NW	29	2	0	0.5	117	0	Dunckel / sanffter Regen / kühl / windigt.
1702	5	22	N	W	29	0	0	1.375	117	0	Kühler starcker Wind / hell.
1702	5	22	A	W	29	0	0	1.125	117	0	Kühler Wind / klar Lufft.
1702	5	23	M	N	28	11	0	1.125	117	0	Kühle trübe Lufft / beschworcken.
1702	5	23	N	NNW	28	11	0	1.5	117	0	Trüb / beschworcken / warm.
1702	5	23	A	NW	28	11	0	1	117	0	Schwuhl / beschwurcken.
1702	5	24	M	NtW	29	0	0	0.375	115	0	Angenehm klar Wetter.
1702	5	24	N	N	28	11	0	1	115	0	Warme Lufft / heller Himmel.
1702	5	24	A	NW	28	11	0	0.375	115	0	Angenehme Lufft / hell.
1702	5	25	M	NW	29	0	0	1	115	0	Kalte Lufft / sonnenbl. Bewölck / haagel.
1702	5	25	N	N	29	0	0	1.125	115	0	Kalter starcker wind / klar / fliegende wolcken.
1702	5	25	A	NNW	29	1	0	0.5	115	0	Kalter wind / meistens klarer Himmel.
1702	5	26	M	NtW	29	1	0	0.25	115	0	Sonnensch. mit Schworcken vermischt.
1702	5	26	N	NtW	29	0	0	0.75	116	0	Sonnenschein / kalt.
1702	5	26	A	N	29	0	0	0.625	117	0	Kühle Lufft / etwas beschworcken.
1702	5	27	M	N	29	1	0	0.625	117	0	Kühl klar / heller Sonnenschein.
1702	5	27	N	NW	29	0	0	1	117	0	Klarer Himmel / kühl.
1702	5	27	A	NW	29	0	0	0.625	116	0	Kühl / heller Himmel.
1702	5	28	M	WtN	29	0	0	0.625	117	0	Theils klar / theils trüb / kalt.
1702	5	28	N	WNW	29	0	0	1	117	0	Wärmere / helle stille Lufft.
1702	5	28	A	WNW	29	0	0	0.75	117	0	Temperirte Lufft / heller Himm. Nahctfrost
1702	5	29	M	W	29	0	0	0.625	113	0	Klar u. trüb abgewechselt / daben kühl.
1702	5	29	N	NW	29	0	0	1	110	0	Heller Himmel / daben warm.
1702	5	29	A	NW	29	0	0	0.75	107	0	Klar / daben kalter Wind.
1702	5	30	M	N	29	1	0	0.5	108	0	Starcker kalter Wind / heller Himmel.
1702	5	30	N	N	29	1	0	0.75	108	0	Warmer Sonnenschein / kühler Wind.
1702	5	30	A	NtW	29	1	0	0.625	108	0	Kühle Lufft / heller Himmel.
1702	5	31	M	NNO	29	2	0	0.5	108	0	Kühle Lufft / klar / windig.
1702	5	31	N	N	29	1	0	1.25	108	0	Warm und hell / daben windig.
1702	5	31	A	NO	29	2	0	0.75	108	0	Gelind und still / hell. Nacht-Frost.
1702	6	1	M	NO	29	1	0	0.5	107	0	Kühl / klar Wetter.
1702	6	1	N	O	29	1	0	1.25	108	0	Schwuhl / stille Lufft.
1702	6	1	A	NO	29	1	0	1	108	0	warme angenehme Abend-Lufft.
1702	6	2	M	NO	29	0	0	1.125	108	0	Trüb / hernach klar und warm.
1702	6	2	N	N	28	11	0	2	107	0	Schwuhl / sanffter warmer Regen.
1702	6	2	A	NW	28	11	0	1.375	107	0	Sanffter Regen / lufftig / kühl.
1702	6	3	M	NW	28	9	0	1.5	101	0	Trübe Lufft / Regen.
1702	6	3	N	NW	28	10	0	1.375	93	0	Regen / sturm.
1702	6	3	A	NW	28	10	0	1.75	94	0	Trübe kühl windige Lufft.
1702	6	4	M	N	28	10	0	1.25	93	0	Trüb / kühl / sturmicht / fliegende Wolcken.
1702	6	4	N	NW	28	10	0	1.875	93	0	Kühl / Wind / Regen.
1702	6	4	A	NW	28	11	0	0.875	93	0	Trüb / kühl.
1702	6	5	M	NO	28	11	0	0.75	93	0	Kühl / windig / klar / fliegende Wolcken.
1702	6	5	N	O	28	10	0	1.5	93	0	warme Lufft / angenehm sonnensch. Regen
1702	6	5	A	O	28	10	0	1.25	94	0	warm / windig / trüb / Nacht-sturm.
1702	6	6	M	W	28	10	0	1	94	0	windig / trüb / zuweilen Sonnenblicke.
1702	6	6	N	W	28	10	0	1.5	97	0	Sonnenschein / lufftig / warm.
1702	6	6	A	NW	28	11	0	1	98	0	Abendroth / streiffende Wolcken / still.
1702	6	7	M	NW	28	11	0	0.75	99	0	Klarer Himmel / stille Lufft.
1702	6	7	N	N	28	11	0	1.25	98	0	Klar Wetter mit Wolcken gemischt.
1702	6	7	A	N	28	11	0	1	98	0	Kühl / Mondsch. trübe streiff Wolcken.
1702	6	8	M	NW	29	0	0	1	99	0	Kühler Wind / sonnensch. mit Bewölck
1702	6	8	N	N	29	0	0	1.25	99	0	Trüb / windig / etwas Regen.
1702	6	8	A	N	28	11	0	1	99	0	sturmicht / kühl beschworckt / Nacht-Regen.
1702	6	9	M	O	28	10	0	1.5	93	0	Warm / trüb / hernach klar.
1702	6	9	N	S	29	9	0	2	74	4	Recht warm / hell / Wolckenstreiffen.
1702	6	9	A	W	29	10	0	1.5	74	0	warm / lufftig / wolken / starcker nacht-reg.
1702	6	10	M	W	28	10	0	1.25	68	0	Kühl / beschworcken.
1702	6	10	N	WtN	28	11	0	1.375	68	0	Trüb / sonnenschein / Staub-Regen.
1702	6	10	A	N	28	11	0	1.125	68	0	Bewolckt / trüb / gelind.
1702	6	11	M	WNW	28	11	0	1.125	68	0	Beschworcken / windigt / Sonnenblicke.
1702	6	11	N	W	28	9	0	2	68	0	Heller Sonnenschein / warm.
1702	6	11	A	W	28	11	0	1.25	68	0	Starcker Thau / Nebel / kühl.
1702	6	12	M	WNW	28	10	0	1.375	65	0	Kühl / neblicht.
1702	6	12	N	N	28	9	0	2	50	0	Auffgeklart / schwuhl / donner / platzregen.
1702	6	12	A	NNO	28	9	0	1.5	50	0	Auffgeklart / stille warme Lufft.
1702	6	13	M	NNO	28	10	0	1.5	49	0	Heller sonnensch. etwas neblicht / warm.
1702	6	13	N	N	28	9	0	2.25	35	0	Schwuhl heller sonnensch. kleiner Regen.
1702	6	13	A	N	28	10	0	1.75	34	0	Klar / still / warm.
1702	6	14	M	N	28	11	0	2.5	34	0	Heller Himmel / stille warme Lufft.
1702	6	14	N	N	28	9	0	2.75	30	0	Recht warm / klar und still.
1702	6	14	A	N	28	11	0	1.875	32	0	Warm / still / heitrer Himmel.
1702	6	15	M	N	28	11	0	1.625	32	0	Stille warme Lufft / auffgeklart.
1702	6	15	N	N	28	10	0	3.75	51	0	Hell / schwuhl / still Wetter.
1702	6	15	A	N	28	10	0	1.875	78	0	Sanffte gelinde / warme klare Lufft.
1702	6	16	M	N	28	10	0	1.875	78	0	Angenehm klar Sommerwetter.
1702	6	16	N	N	28	10	0	2.5	78	0	Recht liebliche / stille / klare warme Lufft.
1702	6	16	A	NNW	28	10	0	2	78	0	Heitrer Himmel / liebliche Abendlufft.
1702	6	17	M	NW	28	10	0	1.875	78	0	Angenehme helle warme Lufft.
1702	6	17	N	NO	28	10	0	2.5	78	0	So wie vor mittag / soch was lufftiger
1702	6	17	A	NO	28	11	0	1.75	78	0	Heller Himmel / lufftig / windig.
1702	6	18	M	ONO	28	0	0	1.5	98	0	Klar / daben zimlich windig.
1702	6	18	N	ONO	28	10	0	2.5	100	0	Hell / warm / daben etwas windig.
1702	6	18	A	NO	28	11	0	2	105	0	Heller anmühtiger Himmel / daben kühl.
1702	6	19	M	ONO	28	11	0	2	105	0	Heller Himmel / etwas kühl.
1702	6	19	N	ONO	28	10	0	2.75	105	0	Warme / klare Lufft / daben windig.
1702	6	19	A	NO	28	10	0	2.25	105	0	Abendröth / angenehme Abend-lufft.
1702	6	20	M	ONO	28	10	0	2.25	105	0	Schön Sommer-Wetter.
1702	6	20	N	S	28	9	0	2.25	105	0	um 4 Uhr Wirbelwind / Regen u. donner.
1702	6	20	A	SO	28	9	0	1.875	105	0	warm / beschworcken / starcker nachtregen.
1702	6	21	M	OW	28	9	0	1.875	96	0	Warm / hell / hernach trüb und Regen.
1702	6	21	N	NW	28	9	0	2.5	85	0	Theils klar / theils starcker Regen.
1702	6	21	A	NW	28	10	0	2	81	0	beschworckt / warm / windig / Nacht-regen.
1702	6	22	M	NW	28	11	0	1.625	80	0	Trüb / kühl / klar / warm. Solstitiu Aestivu d' längste tag.
1702	6	22	N	WtN	28	11	0	2.25	80	0	Schwuhl / streiffwolcken.
1702	6	22	A	WtN	28	11	0	1.75	80	0	Temperirte Sommer-Lufft / klar.
1702	6	23	M	NNW	28	11	0	1.625	80	0	Temperirte Sommer-lufft / etwas nebel.
1702	6	23	N	NO	28	10	0	2.25	80	0	Warm klar Sommerwetter.
1702	6	23	A	NO	28	10	0	2	80	0	Angenehme lufftige Abend- u. sommer-lufft.
1702	6	24	M	O	28	9	0	2.25	80	0	Warm / klar / lufftig
1702	6	24	N	OSO	28	8	0	2.75	80	0	Schwuhl / klar / umb 3 uhr hefftger sturm u. Kreiselwind.
1702	6	24	A	OSO	28	8	0	2.375	80	0	Sanffter Regen / hernach still u. klar.
1702	6	25	M	NW	28	9	0	2	80	0	Gelind / klar / und warm.
1702	6	25	N	N	28	9	0	2.75	80	0	Anmuthig sommerwett. daben windigt.
1702	6	25	A	N	28	9	0	2.25	80	0	Schnee / Abendlufft. In der Nacht Regen.
1702	6	26	M	NNO	28	8	0	2.375	80	0	Theils klar / heils trüb / warmer Regen
1702	6	26	N	N	28	8	0	2.5	75	0	meistentheils starcker warmer Regen
1702	6	26	A	W	28	8	0	2.5	60	0	Etwas auffgeklart / windigt / angenehm.
1702	6	27	M	W	28	8	0	2.125	70	0	Trüb / zuweilen Sonnenblicke.
1702	6	27	N	W	28	9	0	2.5	68	0	Heller sonnensch. angenehm sommerwett.
1702	6	27	A	N	28	9	0	2.25	67	0	Schöne Sommer- und Abend-lufft.
1702	6	28	M	O	28	9	0	2.5	60	0	Trüb / hernach klar und warm wetter.
1702	6	28	N	SW	28	8	0	2.375	60	0	Trüb / hernach klar und shcwuhl.
1702	6	28	A	NW	28	8	0	2.375	63	0	stille schwuhle Lufft / starcker Nacht-regen.
1702	6	29	M	WNW	28	9	0	1.875	63	0	Auffgeklart. temperirte Wärm.
1702	6	29	N	NW	28	8	0	2.5	69	4	Erst klar u. warm / dann Regen / Regenbogen.
1702	6	29	A	SW	28	9	0	2	72	0	Theils trüb / theils klar / temper. wärm.
1702	6	30	M	SW	28	9	0	1.875	81	0	Klar / mäßiger Wärm.
1702	6	30	N	S	28	9	0	2.25	86	0	Etwas beschworckt / doch wieder klar.
1702	6	30	A	SO	28	9	0	2.25	87	0	Beschworckt / Regen / hernach klar.
1702	7	1	M	O	28	9	0	2.125	87	0	Klar angenehm Sommerwetter.
1702	7	1	N	N	28	8	0	2.625	87	0	wie vor mittag / umb 6 uhr Regen.
1702	7	1	A	NW	28	10	0	2.125	87	0	Temperirt Sommerwett. heller Himmel.
1702	7	2	M	NW	28	10	0	2	90	0	Schön still klar warm Sommerwetter.
1702	7	2	N	NtW	28	10	0	2.5	80	0	Recht warm und klar.
1702	7	2	A	N	28	10	0	2	80	0	Warme stille helle Lufft.
1702	7	3	M	N	28	9	0	2.25	80	0	Recht warm / hell und still.
1702	7	3	N	N	28	10	0	2.75	87	0	Still / hell und warm.
1702	7	3	A	N	28	10	0	2	87	0	Wie am Tage.
1702	7	4	M	N	28	9	0	2.5	88	0	Warm / hell und still.
1702	7	4	N	N	28	9	0	2.875	88	0	wie vor mittag / gegen Abend lufftiger.
1702	7	4	A	N	28	9	0	2.5	88	0	Wie nach mittag.
1702	7	5	M	NW	28	8	0	2.375	88	0	Schön warm / hell / lufftig.
1702	7	5	N	SW	28	8	0	3.25	88	0	wie vor mittag / doch ganz still.
1702	7	5	A	NO	28	8	0	2.75	88	0	Wie nach mittag.
1702	7	6	M	SW	28	8	0	2.625	88	0	Schwul / hell / daben stooßweis lufftig
1702	7	6	N	OSO	28	8	0	3.75	88	0	Warm / klar / still Wetter.
1702	7	6	A	SO	28	7	0	3.25	92	0	Schwuhl / etwas trüb und stille Lufft.
1702	7	7	M	OSO	28	7	0	3	92	0	Warm / klar / windig.
1702	7	7	N	SW	28	7	0	3.5	92	0	Gelind / donner windigt / fliegende wolcken
1702	7	7	A	NW	28	9	0	2.5	91	0	Kühl / windig / platzregen. hart Gewitter.
1702	7	8	M	N	28	9	0	2.5	85	0	Fliegende wolcken / mäßige wärme / sonnensch.
1702	7	8	N	NO	28	8	0	3.25	77	0	windig / warm / sonnensch. fliegende wolcken.
1702	7	8	A	SO	28	8	0	3	77	0	Schwuhl / theils klar / theils beschworckt
1702	7	9	M	NO	28	8	0	2.75	77	0	Etwas neblicht / schwuhl / klar & lufftig.
1702	7	9	N	O	28	7	0	4	95	0	Schwuhl / hell und still. eilender sturm.
1702	7	9	A	NO	28	7	0	3.25	103	0	In Norden beschworckt / donner / blitz / windig
1702	7	10	M	O	28	8	0	3	102	0	Hell / still / schwuhl.
1702	7	10	N	SO	28	7	0	4.5	101	0	Kreiselwind / schwuhl / klar.
1702	7	10	A	SW NW	28	8	0	3	104	0	Von Söden klitz / donner / regen. drauss angenehm
1702	7	11	M	NW	28	9	0	2.75	97	0	Sonnenbl. laufende wolcken / windig / warm
1702	7	11	N	NW	28	8	0	3.75	97	0	Schwuhl / lufftig / streiffige Wolcken.
1702	7	11	A	NW	28	9	0	3	97	0	warm / um 2. 3. uhr morg. blitz / donner Regen.
1702	7	12	M	NW	28	8	0	2.75	92	0	Schwuhl / klar.
1702	7	12	N	NW	28	7	0	3.5	90	0	Wie vor mittag.
1702	7	12	A	NW	28	8	0	3	90	0	Wie vor mittag.
1702	7	13	M	W	28	8	0	2.75	90	0	Theils klar / theils trüb / stil / mäßige wärm
1702	7	13	N	NW	28	7	0	3.75	80	0	Recht schwuhl / gegen Abend neblicht.
1702	7	13	A	N	28	7	0	3	81	0	Windigt / neblicht / kühl.
1702	7	14	M	NW	28	7	0	3	75	0	Neblicht / temperirte Wärm.
1702	7	14	N	N	28	7	0	3.5	75	0	Dunckel / daben warm.
1702	7	14	A	NNW	28	7	0	3	75	0	Halb dunckel / still / mäßige Wärm.
1702	7	15	M	WNW	28	7	0	3	75	0	Heller sonnenschein / zimlich heiß.
1702	7	15	N	W	28	7	0	3.25	85	0	wie vor mittag / daben kühler Wind.
1702	7	15	A	W	28	6	0	2.75	100	0	Meistens beolckt / kühler Wind.
1702	7	16	M	WNW	28	6	0	2.75	98	0	Sanffter Regen / hernach sonnenbl. Regen.
1702	7	16	N	W	28	6	0	2.75	98	0	Trüb / sonnenbl. abgewechselt / windig.
1702	7	16	A	W	28	6	0	2.5	103	0	Theils klar / theils bewolckt / kühl.
1702	7	17	M	W	28	7	0	2.125	104	0	Fliegende Schworcken / sonnensch. kühl.
1702	7	17	N	W	28	7	0	2.25	104	0	Bewölckt / Regen / u. sonnensch. abgewechselt.
1702	7	17	A	WtN	28	8	0	2.125	104	0	Meistentheils bewolckt / kühl.
1702	7	18	M	SW	28	8	0	2	103	0	Theils trüb / theils Sonnenblicke.
1702	7	18	N	NO	28	7	0	2.75	96	0	Hell / warm.
1702	7	18	A	NO	28	6	0	2.5	94	0	Wolckigt / lufftig.
1702	7	19	M	SO	28	6	0	2.5	94	0	Meistens trüb / zuweilen sonnenblicke.
1702	7	19	N	S	28	4	0	3.75	94	0	warmer sonnensch. fliegende wolcken.
1702	7	19	A	SW	28	6	0	2.75	93	0	Klar / temperirt / Bewölckt / Nachtregen.
1702	7	20	M	SW	28	4	0	2.75	94	0	Theils klar / theils trüb / windig.
1702	7	20	N	SW	28	4	0	3.5	92	0	Ezliche schauerstarcker regen / klar / wind.
1702	7	20	A	W	28	5	0	2.75	92	0	Still / temperurte wärm / Nachtregen.
1702	7	21	M	SO	28	6	0	2.75	93	0	Theils trüb / theils klar / mäßige Wärm
1702	7	21	N	N	28	4	0	3.25	90	0	Halb u. halb beschworcken / warm.
1702	7	21	A	NW	28	3	0	2.75	91	0	Bewolckt / sonnensch. Regen / windig.
1702	7	22	M	O	28	2	0	3.5	79	0	Trüb / beschworckt.
1702	7	22	N	O	28	1	0	2.75	73	0	Wie vor mittag.
1702	7	22	A	NW	28	1	0	2.75	72	0	Trüb / windig / starcker platz-Regen.
1702	7	23	M	W	28	4	0	2.25	77	0	Unbeständig Wetter / windig.
1702	7	23	N	W	28	4	0	3.25	80	0	starcker anhaltend Regen / klein Gewitter.
1702	7	23	A	O	28	4	0	2.25	81	0	Ganz still und klar.
1702	7	24	M	W	28	5	0	2	81	0	Klar / beständiger sonnensch. sehr windig.
1702	7	24	N	W	28	5	0	2	81	0	Veränderlich / bald Regen / bald sonnensch.
1702	7	24	A	SW	28	6	0	2.25	82	0	Trüb / starcker Regen / groß Gewitter
1702	7	25	M	S	28	5	0	2	88	0	Beständiger Sonnenschein.
1702	7	25	N	SW	28	5	0	2.25	87	0	Trüb / windigt / regenhafftig.
1702	7	25	A	S	28	5	0	2.5	88	0	Etwas klarer Himmel / ganz still.
1702	7	26	M	S	28	4	0	2.25	88	0	Schön hell / beständiger sonnenschein
1702	7	26	N	SW	28	4	0	2.5	88	0	beschworckt / Regen / hefftiges Ungewitt.
1702	7	26	A	SW	28	4	0	2.25	88	0	Veränderlich / bald regen / bald sonnensch.
1702	7	27	M	NW	28	5	0	2	80	0	Trüb / windig / zum Regen geneigt.
1702	7	27	N	N	28	6	0	2.25	78	0	Klar / doch unbeständig / windig.
1702	7	27	A	W	28	6	0	2	78	0	Schön klar / doch zimlich windig.
1702	7	28	M	W	28	6	0	1.5	77	0	Heller beständiger sonnensch. kalter wind
1702	7	28	N	W	28	7	0	1.75	79	0	Hell / daben recht warm.
1702	7	28	A	W	28	7	0	2	85	0	Hell / still und warm.
1702	7	29	M	S	28	7	0	1.75	86	0	Schön klares Wetter / ganz still.
1702	7	29	N	S	28	6	0	1.75	86	0	Beständig sonnensch. reine warme Lufft.
1702	7	29	A	SW	28	6	0	1.5	85	0	Hell klar still und warm.
1702	7	30	M	SO	28	7	0	2	90	0	Warm / hell klar still Wetter.
1702	7	30	N	SO	28	6	0	2.75	90	0	Wie vor mittag / schwuhl.
1702	7	30	A	SO	28	6	0	2.375	92	0	Klar angenehm warme Lufft.
1702	7	31	M	SO	28	6	0	2.25	91	0	Klarer Himmel / warm / still.
1702	7	31	N	W	28	5	0	3.25	90	0	Wie vor mittag / schwuhl.
1702	7	31	A	NW	28	6	0	2.5	96	0	Klare / angenehme warme Lufft.
1702	8	1	M	NNW	28	6	0	2	89	0	Hell / warm und angenehm.
1702	8	1	N	NW	28	7	0	2.75	88	0	Schwuhl / klar / trocken.
1702	8	1	A	NtW	28	6	0	2.25	90	0	Angenehme Sommer- und Abend-Lufft
1702	8	2	M	ONO	28	6	0	2.33	90	0	Meistentheils trüb / Sonnenblicke.
1702	8	2	N	NW	28	6	0	2.75	93	0	Regen / mäßige Wärm.
1702	8	2	A	WNW	28	5	0	2.25	83	0	Beschworckt.
1702	8	3	M	WNW	28	6	0	2.125	83	0	Heller Sonnenschein / kühl.
1702	8	3	N	WtN	28	6	0	2.5	86	0	Helle temperurte Lufft / windig.
1702	8	3	A	WtN	28	6	0	0.125	89	0	Hell / daben kühl.
1702	8	4	M	WSW	28	6	0	2	89	0	Hell / daben / kühl.
1702	8	4	N	SW	28	6	0	2.5	88	0	Sonnensch. hernach trüb / Staub-Regen
1702	8	4	A	SW	28	5	0	2.375	88	0	Staub-Regen / sturmicht.
1702	8	5	M	W	28	4	0	2.375	83	0	Fliegende schworcken / sonnenbl. sturm
1702	8	5	N	W	28	4	0	2.5	85	0	Sonnensch. fliegende Wolcken / wind.
1702	8	5	A	W	28	4	0	2.375	87	0	Wind / meistentheils beschworckt.
1702	8	6	M	SWtS	28	4	0	2.25	83	0	Trüb / reinigt / windig / tempr. wärme.
1702	8	6	N	SW	28	4	0	2.375	88	0	starcker wind / trüb / sonnenb. / Regen.
1702	8	6	A	W	28	5	0	2	86	0	halb und halb aufgeklärt.
1702	8	7	M	W	28	5	0	2	84	0	Sonnenschein / Bewölckt / mäßige wärm.
1702	8	7	N	W	28	5	0	2.25	85	0	Wie vor Mittag.
1702	8	7	A	NW	28	6	0	2	92	0	Stille temperirte klare Lufft.
1702	8	8	M	SOtO	28	7	0	1.625	91	0	Hell / still temperirtes Wetter.
1702	8	8	N	O	28	6	0	2.25	92	0	Heller Sonnenschein / warm und still.
1702	8	8	A	N	28	6	0	2	93	0	Hell.
1702	8	9	M	NO	28	5	0	1.875	91	0	Hell und kühl.
1702	8	9	N	NO	28	5	0	2.25	91	0	Ziemlich warm / hell / lufftig.
1702	8	9	A	N	28	5	0	2.125	92	0	Klare angenehme Abend-Lufft.
1702	8	10	M	NO	28	6	0	0.875	92	0	Klare / kühle Morgen-Lufft.
1702	8	10	N	N	28	5	0	2.75	92	0	Schwuhl klar / lufftig.
1702	8	10	A	N	28	5	0	2	92	0	Heller angenehmer Himmel.
1702	8	11	M	O	28	6	0	1.875	92	0	Anmuthig / hell / warm / lufftig.
1702	8	11	N	N	28	5	0	3.25	92	0	Schwuhl / klar / lufftig.
1702	8	11	A	N	28	6	0	2.125	92	0	Angenehme Sommer- Abend-Lufft.
1702	8	12	M	SO	28	6	0	2	93	0	Klar / still und warm.
1702	8	12	N	SO	28	5	0	3.25	95	0	Recht schwuhl / klar und still.
1702	8	12	A	SO	28	4	0	2.5	95	0	Angenehm / warm und lufftig.
1702	8	13	M	OSO	28	5	0	2.33	94	0	Schön / still / klar warm Wetter.
1702	8	13	N	SO	28	3	0	3.5	95	0	Schwuhl / klar / lufftig.
1702	8	13	A	SO	28	3	0	2.75	95	0	Angenehm / warm und lufftig.
1702	8	14	M	SO	28	3	0	2.5	95	0	Helle / stille warme Lufft.
1702	8	14	N	SO	28	3	0	3.5	96	0	Schön klar / schwuhl / lufftig.
1702	8	14	A	SO	28	2	0	3	97	0	Heller lieblicher Himmel.
1702	8	15	M	SW	28	3	0	2.5	97	0	Nebel / daben still und warm.
1702	8	15	N	W	28	2	0	3.5	83	0	Sonnenschein / schwuhl / still.
1702	8	15	A	W	28	3	0	2.875	81	0	Hell bestirnt / warme stille Lufft.
1702	8	16	M	SW	28	2	0	2.5	81	0	Trüb / sonnenblicke / lufftig / Regen.
1702	8	16	N	W	28	3	0	3.5	87	0	Schwuhl klar / fliegende Wolcken.
1702	8	16	A	NW	28	3	0	2.5	89	0	Klarer Himmel / temperirte Lufft.
1702	8	17	M	W	28	4	0	2.25	89	0	Hell mit Wolcken gemischt / kühl.
1702	8	17	N	W	28	3	0	3	93	0	Hell / fliegende Wolcken gemischt / kühl.
1702	8	17	A	SO	28	4	0	2.5	94	0	Ziemlich klar / kühl und lufftig.
1702	8	18	M	SO	28	3	0	2.5	93	0	Trüb und klar / mäßige wärm / Regen
1702	8	18	N	S	28	1	0	3.25	93	0	Regen / Sonnenschein.
1702	8	18	A	W	28	1	0	2.75	92	0	Trüb.
1702	8	19	M	SW	28	3	0	2	92	0	Sturm / kühl / fliegende Wolcken / sonnenbl.
1702	8	19	N	W	28	3	0	3	94	0	Sonnenschein / windig / warm.
1702	8	19	A	W	28	4	0	2.25	95	0	Temperirt Wetter.
1702	8	20	M	O	28	4	0	2	95	0	Trüb / Sonnenblicke / etwas windig.
1702	8	20	N	NW	28	4	0	2.5	95	0	Trüb / Regen.
1702	8	20	A	NW	28	4	0	2.125	95	0	Regnigt / trüb.
1702	8	21	M	SW	28	4	0	1.875	95	0	Sonnensch. dicke Lufft / gegen mitt. klar
1702	8	21	N	SW	28	4	0	3	95	0	Warm und hell.
1702	8	21	A	NO	28	4	0	2.25	95	0	Angenehme etws kühle Abendlufft.
1702	8	22	M	SOtO	28	4	0	2	94	0	Meistentheils trüb / stille Lufft.
1702	8	22	N	NO	28	4	0	2.75	91	0	Sonnensch. warm / strefige Wolcken.
1702	8	22	A	NO	28	4	0	2	91	0	Still / klar / warm Bewölckt.
1702	8	23	M	NO	28	4	0	2	89	0	Stille Lufft / heller warmer sonnensch.
1702	8	23	N	NO	28	3	0	3.75	89	0	Schwuhl / Donnerwolcken.
1702	8	23	A	NO	28	4	0	2.5	89	0	Schwuhl / stille Lufft.
1702	8	24	M	NO	28	3	0	2	89	0	Kühl klar Wetter.
1702	8	24	N	N	28	2	0	3.75	92	0	Schwuhl / hell.
1702	8	24	A	NW	28	1	0	2.75	95	0	Angenehm warm / stille Abendlufft.
1702	8	25	M	SW	28	2	0	2.25	95	0	Klar warm Wetter.
1702	8	25	N	SW	28	2	0	2.5	87	0	Schwuhl klar still Wetter.
1702	8	25	A	SW	28	2	0	2.5	87	0	Warme stille Lufft.
1702	8	26	M	SO	28	2	0	2.5	87	0	Recht warm klar / freundlich wetter.
1702	8	26	N	SO	28	1	0	4.33	87	0	Hell / schwuhl / daben windigt.
1702	8	26	A	SO	28	1	0	3	88	0	Warme / hell / lufftig.
1702	8	27	M	O	28	1	0	2.75	88	0	Warm / klar / windig.
1702	8	27	N	SO	28	0.5	0	3.75	88	0	starcker Wind / schwuhl / fliegende wolcken
1702	8	27	A	SO	28	0	0	3.25	92	0	Warme stillere Luft.
1702	8	28	M	O	28	6	0	3	91	0	Hell / luftig u. kühl / gegen mitt. Warm
1702	8	28	N	SO	28	9	0	4.5	93	0	Windig / schwuhl / trocken.
1702	8	28	A	SO	28	9	0	3.5	95	0	Lufftig hell / zimlich warm / Wetterleuchten.
1702	8	29	M	SSW	28	9	0	3.125	95	0	Trüb / lufftig / kühl.
1702	8	29	N	SW	28	9	0	3.125	95	4	Trüb / kühl / hernach auffgeklärt.
1702	8	29	A	SW	28	9	0	3	95	0	Helle / warme stille Lufft.
1702	8	30	M	SW	28	0	0	2.875	95	0	Dunckel / kühl / starcker platzregen.
1702	8	30	N	W	28	1	0	3	95	0	Sonnenblicke / gewölckt / windig.
1702	8	30	A	SW	28	2	0	2.25	95	0	Windigt / fliegende Schworcken.
1702	8	31	M	NW	28	3	0	2	95	0	Kühl ( dick gewölckt / Regen / sonnenblicke
1702	8	31	N	NW	28	3	0	1.75	95	0	Kühl / trüb / sonnenblicke.
1702	8	31	A	NW	28	4	0	1.75	98	0	Kühl / trüb / fliegende Wolcken.
1702	9	1	M	O	28	5	0	1.5	95	0	Trüb / kühl / gegen mittag klar.
1702	9	1	N	SO	28	4	0	1.75	95	0	Sonnenschein / klar kühl.
1702	9	1	A	SO	28	4	0	1.75	95	0	Hell bestirnt / kühl.
1702	9	2	M	S	28	4	0	1.75	95	0	Hell und warm.
1702	9	2	N	S	28	2	0	3	95	0	Warm / hell / Sonnenschein / Bewölck.
1702	9	2	A	SW	28	1	0	2.5	95	0	Trüb / die ganze Nacht Regen.
1702	9	3	M	W	28	0	0	2.5	96	0	Regen / hernach etwas klar.
1702	9	3	N	W	28	0	0	2.75	95	0	Sturm / kühl trüb.
1702	9	3	A	W	28	0	0	2.625	94	0	Trüb / kühl / Nacht-Regen.
1702	9	4	M	W	28	1	0	2	94	0	Des Morgens auffgeklärt / windig.
1702	9	4	N	W	28	1	0	2.5	95	0	starcker sturm / sonnensch. Regen / Regenbog.
1702	9	4	A	W	28	2	0	2	95	0	Hell / kühl / in der Nacht Regen.
1702	9	5	M	W	28	2	0	1.5	95	0	Regen / auffgeklärt / kühl / windig.
1702	9	5	N	W	28	2.5	0	1.75	95	0	meistentheils / Regen / Wind u. Kälte.
1702	9	5	A	W	28	2.5	0	1.75	95	0	Trüb / windig / kühl / Nacht.Regen.
1702	9	6	M	SW	28	2	0	1.75	95	0	Trüb / kühl / windig etwas Regen.
1702	9	6	N	SW	28	2	0	2.25	88	0	Trüb / Regen / sonnensch. abgewechselt.
1702	9	6	A	SW	28	2	0	2	88	0	Streiffige Wolcken / meistens trüb.
1702	9	7	M	SSW	28	1	0	1.5	85	0	Klarer Himmel.
1702	9	7	N	W	28	2	0	2.5	85	0	Heller sonnensch. still und warm.
1702	9	7	A	WSW	28	3	0	2	88	0	Trüb / Staub-Regen / Nacht-Regen
1702	9	8	M	WSW	28	3	0	1.5	85	0	Trüb / hernach ganz auffgeklärt.
1702	9	8	N	SW	28	3	0	2.5	85	0	Warm / still hell Wetter.
1702	9	8	A	S	28	3	0	1.875	85	0	Angenehme / helle / warme Abendlufft.
1702	9	9	M	S	28	3	0	1.875	83	0	Trüb / bewolckt / hernach hell.
1702	9	9	N	SW	28	3	0	2.75	80	0	Heller sonnensch. fliegende schworcken.
1702	9	9	A	SW	28	2	0	2.25	75	0	Beschworckt / in der Nacht Regen.
1702	9	10	M	SW	28	2	0	2	75	0	Trüb / sturmig / hernach etwas klar.
1702	9	10	N	SW	28	2	0	2.5	73	0	windig / warm / trüb / hernach klar.
1702	9	10	A	SW	28	2	0	2.25	71	0	Bestirnt / fliegende Wolcken.
1702	9	11	M	WNW	28	2	0	2.25	70	0	Theils klar / theils trüb.
1702	9	11	N	W	28	1	0	2.25	70	0	Meistentheils trüb / warm.
1702	9	11	A	W	28	1	0	1.875	70	0	Hell bestirnt / kühl.
1702	9	12	M	W	28	1	0	1.75	69	0	Meistentheils klar.
1702	9	12	N	NNW	28	1	0	2.25	80	0	Hell / windig / kühl.
1702	9	12	A	NNW	28	2	0	1.625	90	0	Klarer Himmel / kühl.
1702	9	13	M	NW	28	2	0	1.5	90	0	Klar und trüb / kühl / Regen / Haagel.
1702	9	13	N	NW	28	2	0	2	92	0	Klar / daben kühl.
1702	9	13	A	NW	28	2	0	1.625	94	0	Kühl / etwas klar / die ganze Nacht regen.
1702	9	14	M	NW	27	9	0	1.5	93	0	Kalt / windig / starcker Regen u. Haagel.
1702	9	14	N	NNW	27	9	0	1.75	93	0	Wie vor mittag continuirlich.
1702	9	14	A	N	28	0	0	1.625	94	0	Wie vor mittag / die ganze Nacht Regen.
1702	9	15	M	NW	28	0	0	1.375	94	0	Kalt / Sonnenblicke / Regen.
1702	9	15	N	NW	28	1	0	1.75	90	0	Wie vor mittag.
1702	9	15	A	NW	28	1	0	1.625	88	0	Regen / kalr / die ganze Nacht Regen.
1702	9	16	M	W	28	1	0	1.375	86	0	Regen / kühl.
1702	9	16	N	NW	28	1	0	1.5	84	0	Meistens klar / fliegende Schworcken
1702	9	16	A	N	28	1	0	1.5	83	0	Beschworckt zu Nacjt klar / Frost / Reiff
1702	9	17	M	O	28	2	0	1	84	0	Helle klare kalte Lufft.
1702	9	17	N	ONO	28	2	0	1.5	84	0	Etwas warm / klarer Himmel.
1702	9	17	A	O	28	2	0	1.75	83	0	Klar bestirnt / still / kühl / Nacht Reiff / frost.
1702	9	18	M	O	28	3	0	1	86	0	Kalte dicke Lufft / klarer Sonnenschein
1702	9	18	N	O	28	2	0	1.75	86	0	Heller Sonnenschein / warme Lufft.
1702	9	18	A	SO	28	2	0	1.375	84	0	Abendroth / hell bestirnt.
1702	9	19	M	SO	28	2	0	1.5	84	0	Trüb / hernach klar und still.
1702	9	19	N	S	28	2	0	1.75	86	0	Warm klar und still.
1702	9	19	A	SW	28	2	0	1.5	84	0	Wie nach mittag / des Nachts Regen.
1702	9	20	M	S	27	9	0	2	65	0	Trüb / warm / gegen mittag Regen.
1702	9	20	N	S	27	9	0	2.5	45	0	Auffegeklärt / Bewölckt / Regen.
1702	9	20	A	W	27	8	0	2.25	45	0	Trüber Himmel / Nachtregen.
1702	9	21	M	SW	27	9	0	2	43	0	Regen / trüb / starcker Sturm.
1702	9	21	N	SW	28	0	0	1.75	45	0	Sonnenbl. Regen / starcker sturm / hagel.
1702	9	21	A	SW	28	1	0	1.5	45	0	Windig / kühl trüb / klar.
1702	9	22	M	NW	28	3	0	1	46	0	Kühl / hell / windig /
1702	9	22	N	NW	28	3	0	1.25	66	0	Windig / klare Lufft / kühl.
1702	9	22	A	NW	28	4	0	0.875	78	0	Hell bestirnt / kühl.
1702	9	23	M	SW	28	4	0	0.75	80	0	Kühl / beschworcken / Sonnenblicke.
1702	9	23	N	S	28	3	0	1.25	83	0	Meistens trüb. Aequinoct. Autumn.
1702	9	23	A	S	28	3	0	1.25	83	0	Trüb / still / kühl. Tag u. Nacht gleich.
1702	9	24	M	W	28	1	0	1.5	84	0	Trüb / hernach auffgeklärt.
1702	9	24	N	SW	28	1	0	2.25	83	0	Sonnenschein / windig.
1702	9	24	A	SW	28	0	0	1.75	83	0	Etwas klar und bestirnt.
1702	9	25	M	S	28	0	0	2	80	0	Sonnenblicke und Wolcken.
1702	9	25	N	SW	27	8	0	3	75	0	Wie vor mittag / daben Sturm.
1702	9	25	A	SW	27	9	0	2.375	75	0	Hefftiger Sturm / trüb.
1702	9	26	M	SW	27	9	0	2	70	0	Hefftiger Sturm / trüb / Regen.
1702	9	26	N	SW	27	9	0	3	85	0	Wie vor mittag.
1702	9	26	A	SW	27	8	0	2.375	74	0	Sturm / doch gelinder Regen / Nachtregen.
1702	9	27	M	SW	27	7	0	2.75	67	0	Sturm und Regen.
1702	9	27	N	N	27	9	0	3	67	0	Sturm / Regen u. sonnenbl. gewechselt.
1702	9	27	A	N	27	10	0	1.875	67	0	Bestirnt / fliegende Regenwolcken platzregen.
1702	9	28	M	NW	27	11	0	1.5	67	0	Starcker Regen Sonnenblicke.
1702	9	28	N	NW	27	11	0	1.75	67	0	starcker platz-Regen / Regenbog. sonnenbl.
1702	9	28	A	NW	28	0	0	1.5	67	0	Beschworcken / in der Nacht Regen.
1702	9	29	M	S	28	0	0	1.5	67	0	Trüb / kühl / Regen.
1702	9	29	N	S	27	9	0	1.75	67	0	Wie vor mittag / daben windig.
1702	9	29	A	S	27	4	0	2.25	67	0	Trüb / Regen / sturm / Nacht-Regen.
1702	9	30	M	SSW	27	9	0	2.25	67	0	Hefftiger reißender sturm u. platzregen
1702	9	30	N	W	28	0	0	2.5	67	0	Regen / windigt / Sonnenblicke.
1702	9	30	A	NW	28	1	0	1.25	67	0	Meistentheils trüb / auch Regen.
1702	10	1	M	SW	28	1	0	1.75	67	0	Trüb / sturmicht / etwas Regen.
1702	10	1	N	SW	28	1	0	2.25	67	0	Sturm / starcjer Regen.
1702	10	1	A	SW	28	0	0	1.75	67	0	Hefftiger Sturm / Regen.
1702	10	2	M	W	27	9	0	1.75	67	0	Reißender starcker sturm / trüb / Regen.
1702	10	2	N	NW	28	0	0	2	67	0	sturm / trüb / Regen / Sonnenbl.
1702	10	2	A	NW	28	1	0	1.25	67	0	Windig / trüb.
1702	10	3	M	SW	28	1	0	1.5	67	0	Trüb / kühl.
1702	10	3	N	SW	27	11	0	2.5	60	0	warme Lufft / Bewölckt / sonnenblicke.
1702	10	3	A	SW	27	11	0	2	59	0	warm / Bewölckt / Mondsch. Nacht-Regen
1702	10	4	M	WSW	27	9	0	2.25	45	0	Früh um 4-5 uhr starcker platzregen und donner / trüb.
1702	10	4	N	SW	27	8	0	2.5	40	0	Sonnenbl. trüb / Regen.
1702	10	4	A	NW	27	8	0	2.375	38	0	Regen / Haagel.
1702	10	5	M	N	27	10	0	1.5	38	0	Kälter / starcker Regen / Haagel.
1702	10	5	N	N	27	11	0	1.375	43	0	Wie vor mittag.
1702	10	5	A	N	28	0	0	1.25	48	0	Wie vor mittag.
1702	10	6	M	W	28	0	0	1	54	0	starcker Regen / schnee / Hagel / schlagg.
1702	10	6	N	WNW	28	1	0	1.25	54	0	Sonnenbl. Regen / kühl.
1702	10	6	A	WNW	28	3	0	1.625	57	0	Kühl / heller Vollmond / Bewölckt.
1702	10	7	M	NW	28	5	0	0.25	63	0	Kühl / schnee / haagel / Schlagg.
1702	10	7	N	N	28	6	0	0.125	64	0	Kalt / continuirlich Regen.
1702	10	7	A	NW	28	6	0	0.125	64	0	Klar. Regen.
1702	10	8	M	W	28	6	0	0	64	0	Kalt / trüb / Sonnenblicke.
1702	10	8	N	NW	28	6	0	0.125	64	0	Kalt / trüb.
1702	10	8	A	NW	28	6	0	0.25	64	0	Kalt / trüb.
1702	10	9	M	W	28	5	0	0.375	64	0	Kalt und trüb.
1702	10	9	N	W	28	5	0	0.125	64	0	Kühl / trüb / Sonnenblicke.
1702	10	9	A	W	28	5	0	0.5	65	0	Hell bestirnt / Mondsch. kühle Lufft.
1702	10	10	M	W	28	5	0	0.5	64	0	meistens sonnensch. stille mäßige Lufft.
1702	10	10	N	WSW	28	4	0	0.625	60	0	Sonnensch. Bewölckt / stille Lufft.
1702	10	10	A	NW	28	4	0	0.5	60	0	Heller Mond und Sternenschein.
1702	10	11	M	NO	28	5	0	0.5	60	0	Sonnensch. stehendes Bewölckt / kühl.
1702	10	11	N	NO	28	6	0	0.25	57	0	Hell und warm. Stille Lufft.
1702	10	11	A	NO	28	6	0	0.25	56	0	still u. hell Mond u. sternsch. Nachtfr.
1702	10	12	M	NO	28	6	0	0	56	0	still / kühle Lufft / heller Sonnensch.
1702	10	12	N	SO	28	6	0	0.5	56	0	Kühle / heitre Lufft / heller Sonnensch.
1702	10	12	A	SO	28	6	0	0.25	56	0	Hell u. klar bestirnt / Nachtfrost / Reiff.
1702	10	13	M	SO	28	5	0	0.25	56	0	still / kalt und klar / Sonnenschein.
1702	10	13	N	SO	28	4	0	0.75	56	0	warmer / heller Sonnensch. Bewölckt.
1702	10	13	A	SO	28	3	0	0.75	56	0	Theils beschworckt / theils bestirnt.
1702	10	14	M	SSO	28	3	0	0.75	56	0	Theils trüb / theils hell. Nicht zu kühl.
1702	10	14	N	W	28	3	0	1	46	0	Wie vor mittag.
1702	10	14	A	W	28	2	0	0.875	40	0	stille temprirte Lufft / bestirnt / Bewölckt
1702	10	15	M	O	28	3	0	0.875	40	0	Dicker Nebel / kühl.
1702	10	15	N	O	28	3	0	1	40	0	Trüb.
1702	10	15	A	O	28	2	0	0.75	40	0	Trüb / In der Nacht Regen.
1702	10	16	M	O	28	2	0	1	30	0	Regen / kühl.
1702	10	16	N	O	28	2	0	1.25	25	0	warm / Bewölckt / Sonnenblicke.
1702	10	16	A	O	28	2	0	1	18	0	Meistentheils trüb.
1702	10	17	M	NO	28	3	0	1	0	3	Dicker Nebel.
1702	10	17	N	NO	28	3	0	1.25	0	1	Dunckle / stille / temperirte Lufft.
1702	10	17	A	O	28	3	0	1	0	10	Hell bestirnt.
1702	10	18	M	SO	28	3	0	1.25	0	15	Dicker / naßer Nebel.
1702	10	18	N	SO	28	3	0	1.75	0	20	Warmer Sonnenschein / still.
1702	10	18	A	SO	28	3	0	1	0	22	Hell bestirnt.
1702	10	19	M	S	28	2	0	1.5	0	30	Neblicht / gegen mittag Sonnenblicke
1702	10	19	N	SW	28	1	0	1.75	0	36	Sonnenschein und Bewölckt.
1702	10	19	A	SW	28	1	0	1.5	0	40	Abendroth / stille temperirte Lufft.
1702	10	20	M	SW	28	0	0	1.5	0	28	Trübe / stille / neblichte Lufft.
1702	10	20	N	SW	28	0	0	1.5	0	30	Trüb.
1702	10	20	A	SW	28	0	0	1.75	0	36	Halb und halb bestirnt.
1702	10	21	M	SW	27	7	0	1.75	0	27	Trüb / sturmicht.
1702	10	21	N	SW	27	6	0	1.75	0	28	Heller angenehmer Sonnenschein.
1702	10	21	A	SW	27	8	0	1.5	0	30	Hell bestirnt / temperirte Lufft.
1702	10	22	M	SO	27	5	0	1.75	0	24	Trübe / stille neblichte Lufft.
1702	10	22	N	SO	27	4	0	2	0	25	Trüb /
1702	10	22	A	SO	27	4	0	0.25	0	28	Halb und halb bestirnt.
1702	10	23	M	SO	27	3	0	2	0	20	Nebel / gegen mittag Sonnenschein.
1702	10	23	N	SO	27	4	0	2.375	0	25	Warm Wetter / meistens klar.
1702	10	23	A	SO	27	5	0	2	0	26	Hell bestirnt.
1702	10	24	M	SSW	27	8	0	1.5	0	25	Nebel / gegen mittag Staubregen.
1702	10	24	N	W	27	8	0	1.75	0	30	Regen / Sturm.
1702	10	24	A	W	27	9	0	1.5	0	37	Hefftiger Regen / Wind.
1702	10	25	M	SO	27	10	0	1.5	0	30	Trüb kühl.
1702	10	25	N	S	27	11	0	1.75	0	29	Regen.
1702	10	25	A	SW	27	11	0	1.5	0	26	Regen.
1702	10	26	M	SO	28	0	0	1	0	21	Helle kühle Lufft.
1702	10	26	N	SO	28	0	0	1.5	0	18	Trüb.
1702	10	26	A	SO	28	0	0	1.25	0	17	Hell bestirnt.
1702	10	27	M	S	28	0	0	1	0	15	Trübe gelinde Lufft / Sonnenblicke.
1702	10	27	N	S	28	0	0	1.5	0	15	Wie vor mittag.
1702	10	27	A	S	28	0	0	1.25	0	13	Meistentheils trüb.
1702	10	28	M	SW	28	1	0	1	0	16	Heller Sonnenschein / Bewölckt.
1702	10	28	N	SW	28	1	0	1.5	0	17	Sonnenblicke / Regen.
1702	10	28	A	SW	28	0	0	1.25	0	17	Regen / kalt / windig.
1702	10	29	M	S	28	0	0	1.5	0	17	Regen / kalt / wind.
1702	10	29	N	S	28	0	0	1.5	0	18	Wie vor mittag.
1702	10	29	A	SO	28	1	0	1.25	0	18	Starcker Regen / Sturm.
1702	10	30	M	SW	28	1	0	0.75	0	18	Klar / kühl / Bewölckt.
1702	10	30	N	W	28	1	0	1	0	18	Regen.
1702	10	30	A	W	28	1	0	1	0	19	Heller Mondsch. temperirt Wetter.
1702	10	31	M	WNW	28	0	0	1.5	0	17	Sonnenblick / fliegende Schworcken.
1702	10	31	N	WNW	28	0	0	1.5	0	19	Bewölckt / Regen.
1702	10	31	A	NW	28	0	0	1.25	0	18	Bewölckt / wind. NB: starcker nachtsturm sehr hoch Pregelwas.
1702	11	1	M	NW	29	0	0	1	0	16	Kühl / Sonnenblicke / Bewölckt.
1702	11	1	N	NW	29	0	0	0.5	0	15	Trüb / Regen / kühl.
1702	11	1	A	N	29	0	0	0.75	0	16	Wie nach mittag.
1702	11	2	M	NW	28	11	0	1	0	18	Regen / kühl.
1702	11	2	N	W	28	11	0	1.5	0	14	Wind / Regen.
1702	11	2	A	SW	29	0	0	1	0	15	Sturm / Bewölckt / Mondschein.
1702	11	3	M	SW	28	10	0	1	0	12	Staub-Regen / trüb.
1702	11	3	N	SW	28	10	0	1.25	0	15	Trüb / daben warm.
1702	11	3	A	SW	29	0	0	0.75	0	8	Fliegende Wolcken / Mondschein.
1702	11	4	M	NW	29	2	0	0.5	0	13	Trübe / dicke / stille / nicht kalte Lufft / sonnensch.
1702	11	4	N	SW	29	2	0	0.75	0	14	Heller warmer sonnensch. Daben wind.
1702	11	4	A	SW	29	2	0	0.5	0	16	Windig / meistens trüb.
1702	11	5	M	SW	29	0	0	0.75	0	18	Stille dicke trübe Lufft / Regen.
1702	11	5	N	SW	28	11	0	0.875	0	18	Wie vor mittag.
1702	11	5	A	SSW	28	10	0	1	0	19	Sturm / trüb / daben warm.
1702	11	6	M	W	28	10	0	0.875	0	16	Sonnenblicke / Bewölckt / Regen.
1702	11	6	N	NW	28	10	0	0.625	0	15	Sonnenschein / Schlagg / kühl.
1702	11	6	A	W	28	10	0	0.5	0	15	Regen / schlagg. Mond- u. Sternsch. frost
1702	11	7	M	NW	28	11	0	0.25	0	15	Reiff / kühle klare Lufft.
1702	11	7	N	NNW	28	11	0	0.25	0	11	Kühl / klar / hernach dicker Schnee.
1702	11	7	A	NNW	28	11	0	0	0	11	Bestirnt / kühle unfreundl. Lufft.
1702	11	8	M	NO	29	0	0.125	0	0	11	Frost / Nebel / Roh-Reiff.
1702	11	8	N	N	28	11	0	0	0	11	Kalt / meistentheils hell.
1702	11	8	A	NO	28	11	0	0	0	11	Trüb / klar / gelind / starcker nachtsturm.
1702	11	9	M	N	28	10	0	0	0	8	Frost / Schnee / trüb.
1702	11	9	N	N	28	10	0	0	0	8	Kalt / starcker Schnee.
1702	11	9	A	N	28	11	0	0	0	8	Meistens beschworckt / kalt.
1702	11	10	M	NO	29	1	0.125	0	0	8	Starcker Schnee / kalt / trüb.
1702	11	10	N	W	29	1	0.25	0	0	8	Ganz stille Lufft / klar.
1702	11	10	A	SW	29	1	0.5	0	0	8	Dicker ungesunder Nebel / stille Lufft.
1702	11	11	M	SO	29	2	0.875	0	0	8	Frost / nebelicht.
1702	11	11	N	S	29	3	0.875	0	0	10	Auffgeklärt / Frost.
1702	11	11	A	SW	29	3	1	0	0	12	Hell bestirnt / windig / zimlicher Frost.
1702	11	12	M	SW	29	4	1.125	0	0	12	meistens trüb / ziml. frost / starcker wind
1702	11	12	N	S	29	4	1	0	0	12	Sonnenschein / Frost.
1702	11	12	A	S	29	4	1.125	0	0	12	Bestirnt / fliegende schneewolcken / Frost.
1702	11	13	M	S	29	5	1.625	0	0	9	meistentheils klar / stille Lufft / Frost.
1702	11	13	N	S	29	6	1.625	0	0	11	Frost / heller Himmel u. Sonnensch.
1702	11	13	A	SO	29	6	1.375	0	0	9	Bestirnt / stiller Frost.
1702	11	14	M	SW	29	5	1.25	0	0	9	meistens trüb / mäßiger frost / Glad-Eiß
1702	11	14	N	SW	29	4	0.5	0	0	10	Regen / Sturm / Dauwetter.
1702	11	14	A	SW	29	2	0.25	0	0	11	Wie nach mittag.
1702	11	15	M	S	29	1	0.0625	0	0	22	Trüb / Dauwetter.
1702	11	15	N	S	28	11	0	0.25	0	25	Trüb / Dauwetter / hohler Wind.
1702	11	15	A	S	28	11	0	0.375	0	24	Wie nach mittag.
1702	11	16	M	S	28	11	0	0.25	0	25	Still / gelind / trüb / Sonnenblicke.
1702	11	16	N	S	28	10	0	0.5	0	25	Sonnenblick / trüb / windig.
1702	11	16	A	S	28	8	0	0.5	0	24	Trüb / windig / in der Nacht Schnee
1702	11	17	M	SW	28	6	0	0.625	0	24	Kühle / dunckle Lufft / Dauwett. Sturm
1702	11	17	N	SW	28	6	0	1	0	23	Windig / Staub-Regen / Sonnenbl.
1702	11	17	A	SW	28	7	0	0.75	0	25	Regen / daben stille Lufft.
1702	11	18	M	W	28	7	0	0.625	0	24	Trüb / Schlagg / Sonnenblicke.
1702	11	18	N	NW	28	8	0	0.5	0	22	Bewälckt / Schlagg / Sonnenbl.
1702	11	18	A	NW	28	9	0	0.25	0	20	Zimlich bestirnt / stille Lufft.
1702	11	19	M	O	28	7	0	0.5	0	20	Nachtfrost / Reiff / trüb / Schneegekrüm.
1702	11	19	N	SO	28	5	0	0.75	0	22	dicker / starcker wäßiger schnee / schlagg.
1702	11	19	A	SO	28	5	0	0.75	0	23	Trübe gelinde stille Lufft.
1702	11	20	M	NO	28	5	0	0.75	0	25	Nacht-Frost / trüb / windig.
1702	11	20	N	O	28	5	0	1	0	26	Trüb.
1702	11	20	A	O	28	4	0	1.125	0	26	Regen / windig.
1702	11	21	M	SO	28	5	0	0.75	0	26	Kühle klare Lufft.
1702	11	21	N	O	28	6	0	0.5	0	25	Heller Himmel / klarer Sonnenschein.
1702	11	21	A	O	28	7	0	0.375	0	25	Meistentheils hell / sharffe Lufft.
1702	11	22	M	NW	28	7	0	0.5	0	25	Regen / schnee / schlag / ungestümer wind
1702	11	22	N	W	28	8	0	0.25	0	25	Etwas auffgeklart / dicke fliegende wolcke
1702	11	22	A	W	28	10	0	0	0	25	Meistentheils trüb / stille Lufft.
1702	11	23	M	SW	29	1	0.25	0	0	25	Etwas kühl / trüb / Sonnenblicke.
1702	11	23	N	SW	29	3	0.25	0	0	27	Wie vor mittag.
1702	11	23	A	SW	29	5	0.625	0	0	27	Kalte stille trübe Lufft /
1702	11	24	M	SO	29	5	0.75	0	0	27	Neblicher / kühl.
1702	11	24	N	SO	29	5	0.75	0	0	27	Kühle stille neblichte Lufft.
1702	11	24	A	SO	29	5	0.75	0	0	27	Starcker Nebel / kalte Lufft.
1702	11	25	M	SO	29	5	0.875	0	0	28	Reiff / Frost / Nebel / windigt.
1702	11	25	N	S	29	5	0.75	0	0	28	Neblicht / kühl.
1702	11	25	A	S	29	5	0.75	0	0	29	Trüb / etwas neblicht / kühl.
1702	11	26	M	S	29	5	0.75	0	0	33	Gelind 7 dicker Nebel.
1702	11	26	N	SO	29	5	0.5	0	0	35	Neblicht / Staub-Regen / gelind.
1702	11	26	A	SO	29	5	0.5	0	0	38	Neblicht / Regen.
1702	11	27	M	SO	29	4	0.5	0	0	37	Gelind / trüb / unluftig Wetter.
1702	11	27	N	S	29	4	0.375	0	0	37	Hohler Wind / trüb / Staub-Regen.
1702	11	27	A	S	29	4	0.375	0	0	36	Wie nach mittag.
1702	11	28	M	SO	29	4	0.25	0	0	36	Rauher Wind / schnee / schlagg / Regen.
1702	11	28	N	SO	29	4	0.125	0	0	36	Ganz trüb / unfreundlich Wetter.
1702	11	28	A	SO	29	4	0.125	0	0	35	Regen / hohler Wind.
1702	11	29	M	SO	29	4	0.125	0	0	41	Trübe / dicke Lufft / rauher Wind.
1702	11	29	N	SO	29	4	0	0	0	46	Wie vor mittag.
1702	11	29	A	SO	29	3	0	0.125	0	4	Regen.
1702	11	30	M	S	29	3	0.33	0	0	48	Heller Sonnenschein / stille gelinde Lufft.
1702	11	30	N	SO	29	3	0	0	0	49	Wie vor mittag.
1702	11	30	A	SO	29	4	0	0	0	46	Heller Mondschein / klar bestirnt gelind
1702	12	1	M	SO	29	4	0.33	0	0	40	Heller Sonnenschein / scharffer Wind.
1702	12	1	N	SO	29	3	0.125	0	0	38	Wie vor mittag.
1702	12	1	A	SO	29	3	0.25	0	0	35	Heller Sonnenschein / kühler Wind.
1702	12	2	M	SSO	29	4	0.375	0	0	35	Reiff Nachtfrost / heller Sonnensch.
1702	12	2	N	SO	29	3	0	0	0	37	Gelind klar Wetter /
1702	12	2	A	SO	29	3	0.25	0	0	36	Heller Mond u. Sternsch. gelind' wind.
1702	12	3	M	SSO	29	1	0	0.25	0	37	Gelind / meistentheils heller sonnensch.
1702	12	3	N	SSO	28	10	0	0.5	0	37	Sonnenschein / gelind.
1702	12	3	A	SSO	28	10	0	0.75	0	37	Beschworckt / warmer Regen.
1702	12	4	M	S	28	9	0	0.75	0	40	Gelind / still meistens trüb.
1702	12	4	N	S	28	9	0	1	0	40	Ganz gelind / still und trübe Lufft.
1702	12	4	A	S	28	9	0	0.75	0	42	Eben so / wie nach Mittag.
1702	12	5	M	N	28	10	0	0.5	0	42	Nachtfrost / von 8. uhr dicker stinck Nebel
1702	12	5	N	N	28	10	0	0.375	0	43	Fliegender fallender Nebel / gelind.
1702	12	5	A	N	28	10	0	0.375	0	44	Dicker stinck Nebel / gelind / zu nacht hell
1702	12	6	M	SW	28	10	0	0.375	0	44	Nacht-schnee. Früh Regen / hernach klar.
1702	12	6	N	S	28	11	0	0.25	0	44	Theils trüb / theils klar / gelind.
1702	12	6	A	S	28	11	0	0.125	0	44	Abendroth / klar bestirnt gelind.
1702	12	7	M	S	29	0	0	0	0	44	Nachtfrost / rächricht / hernach klar.
1702	12	7	N	S	29	0	0	0	0	44	Meist auffgeklart / gewölckt.
1702	12	7	A	S	29	0	0.25	0	0	44	Etwas kühler / zimlich trüb.
1702	12	8	M	S	29	2	0.5	0	0	44	Frost / trüb / gegen mittag klar.
1702	12	8	N	S	29	2	0.375	0	0	44	Klar / kalt / stille Lufft.
1702	12	8	A	S	29	2	0.5	0	0	44	Trüb / kalt / still.
1702	12	9	M	NO	29	3	0.5	0	0	43	Kalt / klar / trüb / bald dicker Schnee.
1702	12	9	N	SW	29	4	0.625	0	0	43	Trübe stille Lufft / kühl / Schnee.
1702	12	9	A	NO	29	6	1	0	0	44	Kalt / trüb / still.
1702	12	10	M	SO	29	7	1.625	0	0	40	Zimliche Kälte / klar u. trüb wechseln.
1702	12	10	N	SO	29	6	1.25	0	0	40	Kalt und windig / Sonnenschein.
1702	12	10	A	S	29	5	0.875	0	0	40	Gelinder / trüb / zimlicher Nachtwind
1702	12	11	M	SW	29	2	0.375	0	0	40	Gelind / meistentheils trüb / windigt.
1702	12	11	N	SW	28	11	0	0.375	0	41	Windig gelind / Dazwetter.
1702	12	11	A	SW	28	9	0	0.375	0	42	Ganz gelind / trüb / Regen.
1702	12	12	M	SW	28	8	0	0.5	0	42	meistens trüb / staub-regen / wind / sonnenbl.
1702	12	12	N	SW	28	8	0	0.75	0	45	Trüb / Sturm.
1702	12	12	A	SW	28	8	0	0.75	0	44	Dunckel / hefftger Sturm / schnee / Regen.
1702	12	13	M	SW	28	7	0	0.625	0	45	Trüb / dicker schnee / schlagg / sonnenbl.
1702	12	13	N	SW	28	9	0	0.5	0	44	meistens trüb / gelind / schnee-getrümel.
1702	12	13	A	SW	28	10	0	0.25	0	44	Schnee / gelind / hell bestirnt.
1702	12	14	M	SW	29	0	0	0.25	0	43	Frost / meistentheils klar still.
1702	12	14	N	S	29	0	0	0.25	0	43	Wie vor mittag.
1702	12	14	A	WSW	28	11	0	0	0	43	Gelinder / Trüb.
1702	12	15	M	S	28	7	0	0.375	0	40	ungestühm / kalter wind / dicker schnee.
1702	12	15	N	SSO	28	6	0	0.5	0	41	meistentheils trüb / nicht zu windig.
1702	12	15	A	SSO	28	7	0	0.5	0	41	Gelind / still und trüb.
1702	12	16	M	SW	28	8	0	0.5	0	41	Gelind / still / trüb / Dauwetter.
1702	12	16	N	SW	28	8	0	0.625	0	42	Wie vor mittag.
1702	12	16	A	SW	28	8	0	0.375	0	42	Noch einerlen Wetter / Nachtschnee.
1702	12	17	M	N	28	10	0	0.125	0	43	Trüb / kalter Wind / sonnenbl.
1702	12	17	N	WNW	28	11	0.125	0	0	42	Trüb / still / starcker dicker Schnee
1702	12	17	A	WNW	29	0	0.5	0	0	40	Still / trüb / kalt.
1702	12	18	M	SW	29	1	0.375	0	0	29	Zimlicher / Frost / hell und klar.
1702	12	18	N	SO	29	2	1	0	0	25	Frost / windig / heitrer Himmel.
1702	12	18	A	SO	29	1	0.375	0	0	20	Gelind / hohler Wind / sturm stühm.
1702	12	19	M	SO	29	2	0.375	0	0	20	Windig / kalt / heller Sonnenschein.
1702	12	19	N	S	29	2	0.25	0	0	20	Sonnenschein / schneidender Wind / kalt
1702	12	19	A	SSO	29	2	0	0.25	0	19	Hohler Sturm- Wind / gelind.
1702	12	20	M	SSO	29	2	0	0.25	0	21	Gelinder Kält / stille klare Lufft.
1702	12	20	N	S	29	0	0	0.5	0	26	Klar / still Wetter / mäßige Kält.
1702	12	20	A	O	28	5	0	1	0	29	Hell bestirnt.
1702	12	21	M	S	28	3	0	1	0	39	Trüb / gelind / Dauwetter / Regen.
1702	12	21	N	SW	28	4	0	0.5	0	40	Wie vor mittag / starcker Sturm.
1702	12	21	A	SW	28	5	0	0.75	0	40	Dauwetter / kalt / Sturm.
1702	12	22	M	W	29	0	0.25	0	0	41	Etwas kühler / stiller / klar.
1702	12	22	N	W	29	2	0.5	0	0	32	Kalt / heller Sonnenschein / still.
1702	12	22	A	W	29	4	1	0	0	24	Hell bestirnt / stille Lufft / Frost.
1702	12	23	M	SSO	29	4	0.75	0	0	23	morgenröth / starcker scheidender Wind
1702	12	23	N	S	29	4	0.5	0	0	23	Kühl / windig / Hagel / Regen.
1702	12	23	A	SW	28	10	0	0.125	0	15	starcker Haagel / Regen / starcker nachtfr.
1702	12	24	M	WSW	28	7	0	0.75	0	23	Hefftiger reißender sturm / Dauw. Regen
1702	12	24	N	W	29	0	0	0.5	0	30	Gelindere / stillere Lufft / trüb.
1702	12	24	A	W	29	0	0	0.25	0	40	Gelind / still / trüb.
1702	12	25	M	W	28	10	0	0.75	0	39	Dunckel / warmer starcker Regen.
1702	12	25	N	SW	28	6	0	1	0	45	Räuchrig / warm / starcker Regen.
1702	12	25	A	SW	28	7	0	0.75	0	46	Still / gelind / zimlich bestirnt.
1702	12	26	M	NW	28	10	0	0.5	0	41	Trüb / windig / kühl / Schnee.
1702	12	26	N	NW	29	0	0.25	0	0	41	Starcker Schnee / Sonnenbl. windig.
1702	12	26	A	NW	29	2	0.5	0	0	40	Hell bestirnt / still / kühl.
1702	12	27	M	SO	29	1	0.625	0	0	34	Trüb / kühl / windig.
1702	12	27	N	SO	28	9	0	0.25	0	32	Trüb / kühl / hohler Wind.
1702	12	27	A	O	28	8	0	0.375	0	31	Trüb / Schnee / Stühm / kühler Wind.
1702	12	28	M	SSW	28	6	0	0.5	0	34	Trüb / schnee / stühm / kühler starcker wind
1702	12	28	N	SW	28	6	0	0.5	0	30	Dicker starcker Schnee / Stühm.
1702	12	28	A	W	28	6	0	0.5	0	38	Stühm / NB. Starcker Nacht-Schnee.
1702	12	29	M	NW	28	6	0	0.5	0	40	Gelind / meistentheils trüb / sonnenblicke.
1702	12	29	N	NW	28	8	0	0.25	0	40	Wie vor mittag.
1702	12	29	A	N	28	11	0.375	0	0	34	Still trüb / mäßige Kält.
1702	12	30	M	NO	28	1	0.375	0	0	37	Kalt / trüb / sonnenbl. windig.
1702	12	30	N	SO	28	11	0.5	0	0	37	Scharffer kalter hohler Wind / trüb.
1702	12	30	A	SSO	28	10	0.75	0	0	37	Trübe Lufft etwas windig kühl.
1702	12	31	M	SW	28	7	0	0.5	0	37	Gelind / Dauwetter / trüb hohler Wind.
1702	12	31	N	SW	28	6	0	0.625	0	41	Wie vor mittag
1702	12	31	A	SW	28	4	0	1	0	41	Einerlen Wetter.
